# Supplementary material for: Electrochemical trifluoromethylation of 2-isocyanobiaryls using CF3SO2Na: synthesis of 6-(trifluoromethyl)phenanthridines
Source: Royal Society of Chemistry journal article supplement (doi:10.1039/d3ob00239j), 2023-01-01

## Supporting information

### **Electrochemical trifluoromethylation of 2-isocyanobiaryls using $\text{CF}_3\text{SO}_2\text{Na}$ : Synthesis of 6-(trifluoromethyl)phenanthridines**

Kannika La-ongthong, Teera Chantarojsiri, Darunee Soorukram, Pawaret Leowanawat, Vichai Reutrakul and  
Chutima Kuhakarn

Department of Chemistry, Faculty of Science, Mahidol University, Rama VI Road, Bangkok 10400, Thailand.  
Center of Excellence for Innovation in Chemistry (PERCH-CIC), Faculty of Science, Mahidol University, Rama VI  
Road, Bangkok 10400, Thailand.

E-mail: [chutima.kon@mahidol.ac.th](mailto:chutima.kon@mahidol.ac.th)

**Table of Contents**

|                                                                                |     |
|--------------------------------------------------------------------------------|-----|
| 1. Cyclic voltammetry: Fig. S1, S2                                             | S3  |
| 2. Faradaic calculation                                                        | S3  |
| 3. General procedure A (Synthesis of 2-isocyanobiphenyls <b>1</b> ): Scheme S1 | S4  |
| 4. General procedure B (Synthesis of phenanthridines <b>3</b> ): Scheme S2     | S4  |
| 5. Radical trapping experiment: Scheme S3                                      | S4  |
| 6. Picture of experimental set up: Fig. S3                                     | S4  |
| 7. NMR spectra of 2-isocyanobiphenyls <b>1a-1s</b>                             | S5  |
| 8. NMR spectra of 6-(trifluoromethyl)phenanthridines <b>3a-3s</b>              | S28 |
| 9. NMR spectra of (3,3,3-trifluoroprop-1-ene-1,1-diyl)dibenzene <b>4</b>       | S68 |

## 1. Cyclic voltammetry

Cyclic voltammetry experiments were conducted in a 4-neck flask that contained the analytes dissolved in a 0.1 M solution of tetrabutylammonium hexafluorophosphate in acetonitrile. A glassy carbon disc ( $\varnothing$  3 mm), a Pt wire ( $\varnothing$  0.5 mm), and Ag/AgCl electrode were used as a working electrode, a counter electrode, and a pseudo-reference electrode, respectively. The voltage was measured by PalmSens4 potentiostat in the presence of ferrocene as an external standard, at a scan rate of 0.1V/s (Fig. S1 and S2).

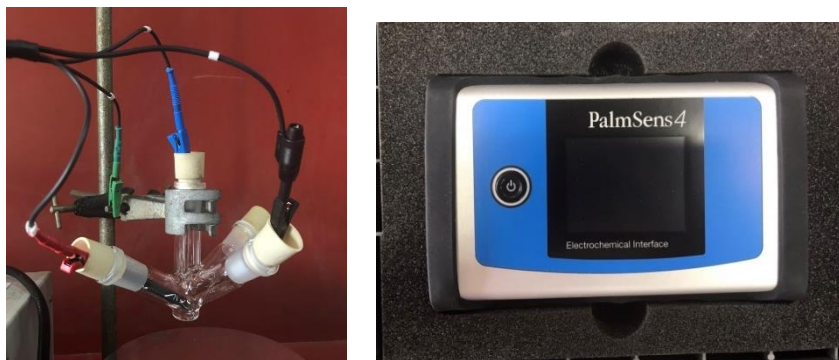

Fig. S1 Cyclic voltammetry experiment set up.

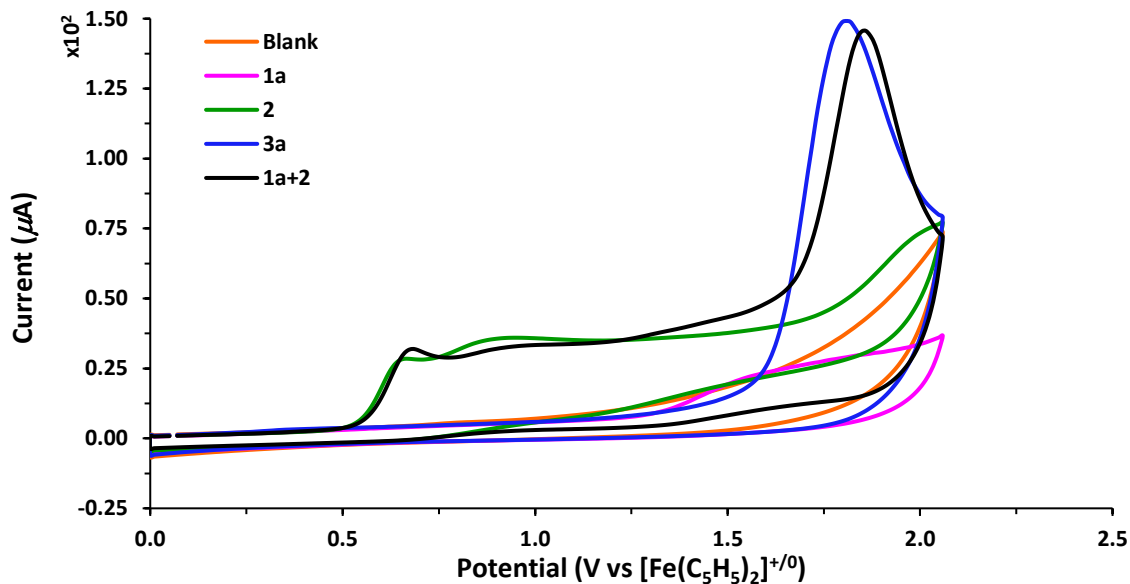

Fig. S2 Cyclic voltammograms of Blank, 1a, 2, and 3a.

## 2. Faradaic calculation

$$\text{Faradaic efficiency} = \frac{Q_{\text{experimental}}}{Q_{\text{theoretical}}} \times 100$$

$$\text{Faradaic efficiency} = \frac{z \times n \times F}{Q_{\text{theoretical}}} \times 100$$

With  $z$  = number of electron required for the reaction used = 2

$n$  = mol of product obtained = (maybe use the number in moles here and list the mass in parentheses) 0.0447 g (88%, MW. of product = 247.2202 g/mol)

F = Faradaic constant (96485 C/mol)

$Q_{\text{theoretical}} = I \text{ (current, Ampere)} \times t \text{ (reaction time, second)}$

$$\text{Faradaic efficiency} = \frac{2 \times \left( \frac{0.0447 \text{ g}}{247.2202 \text{ g/mol}} \right) \times 96485}{0.005 \text{ A} \times 7200 \text{ second}} \times 100$$

Faradaic efficiency = 94%

### 3. General procedure A (Synthesis of 2-isocyanobiphenyls 1)

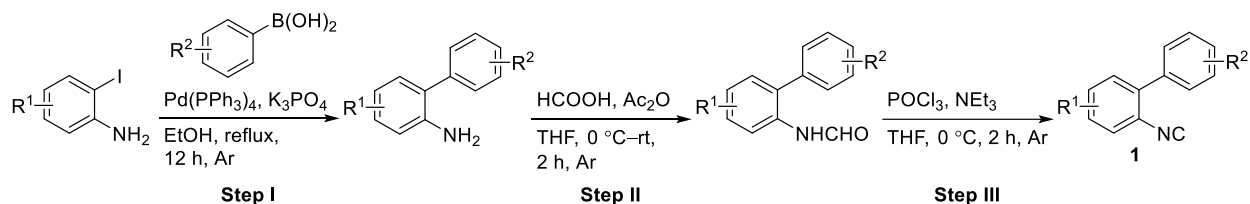

Scheme S1 Synthesis of 2-isocyanobiphenyls 1

### 4. General procedure B (Synthesis of phenanthridines 3)

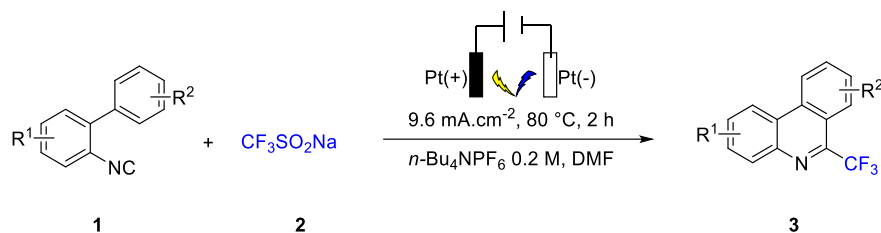

Scheme S2 Synthesis of phenanthridines 3.

### 5. Radical trapping experiment

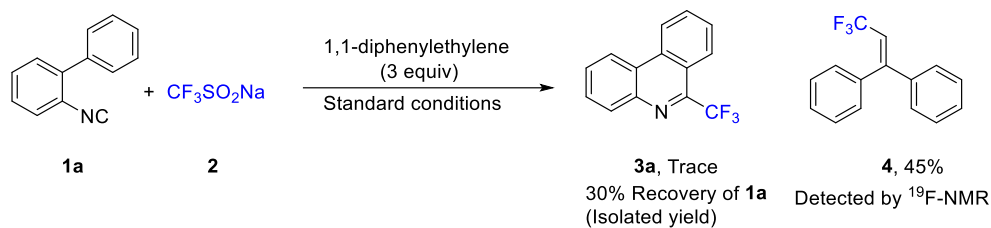

Scheme S3 Radical trapping experiment.

### 6. Picture of experiment set up

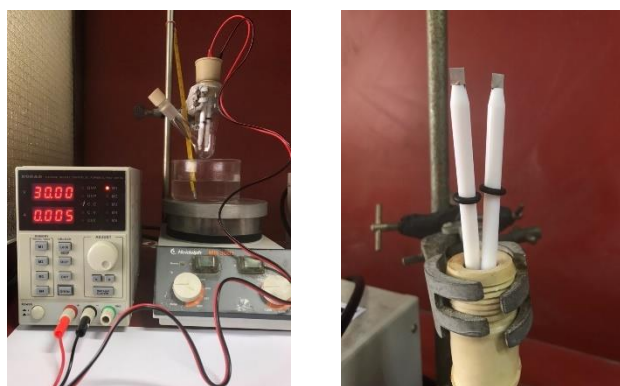

Fig. S3 Reactors set up and electrode.

## 7. NMR spectra of 2-isocyanobiphenyls 1a-1s

 $^1\text{H}$  NMR spectrum of **1a** (400 MHz,  $\text{CDCl}_3$ )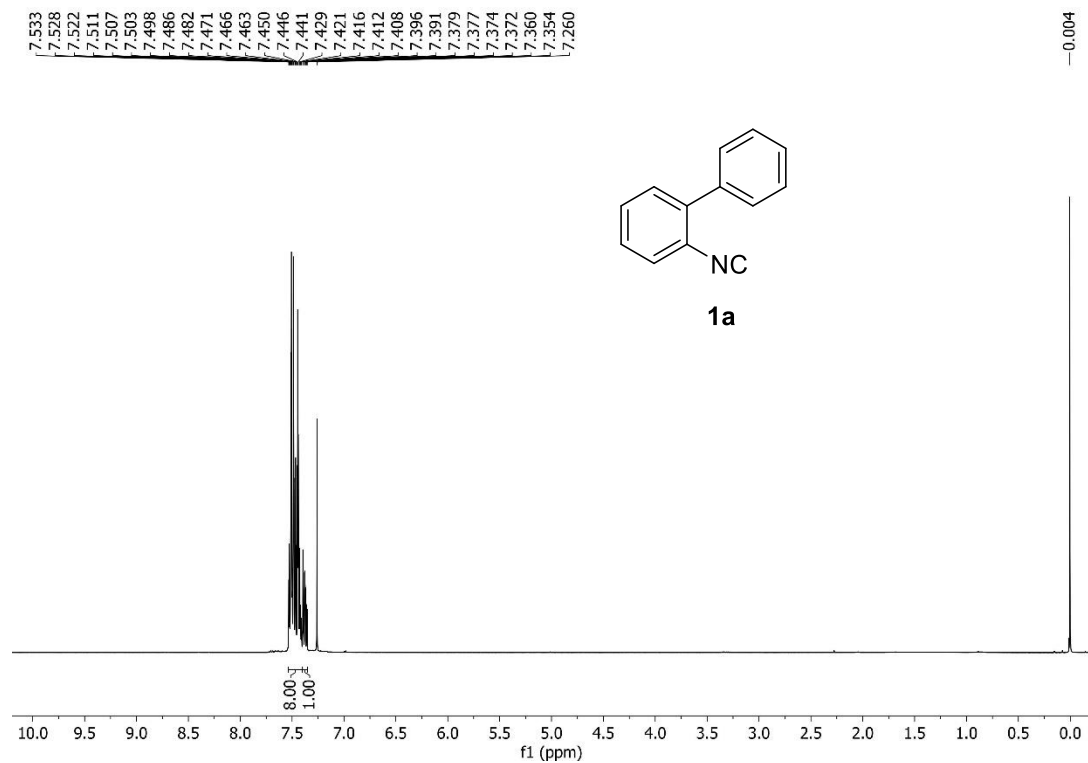 $^{13}\text{C}$  NMR spectrum of **1a** (100 MHz,  $\text{CDCl}_3$ )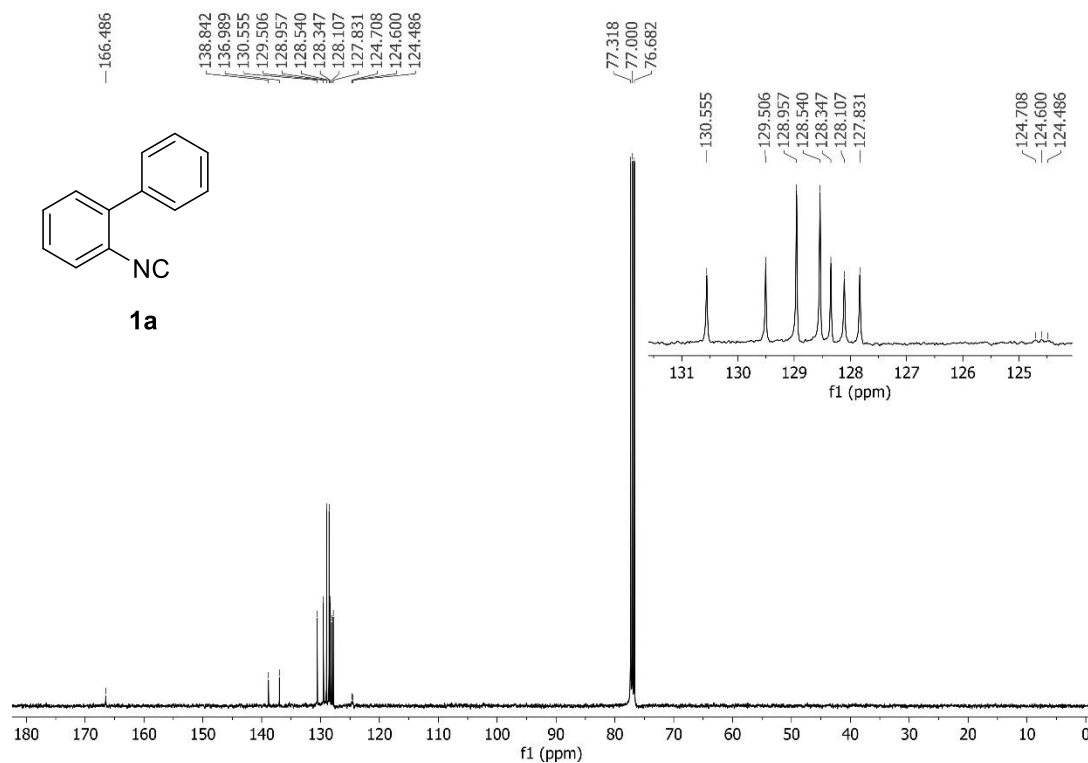

$^1\text{H}$  NMR spectrum of **1b** (400 MHz,  $\text{CDCl}_3$ )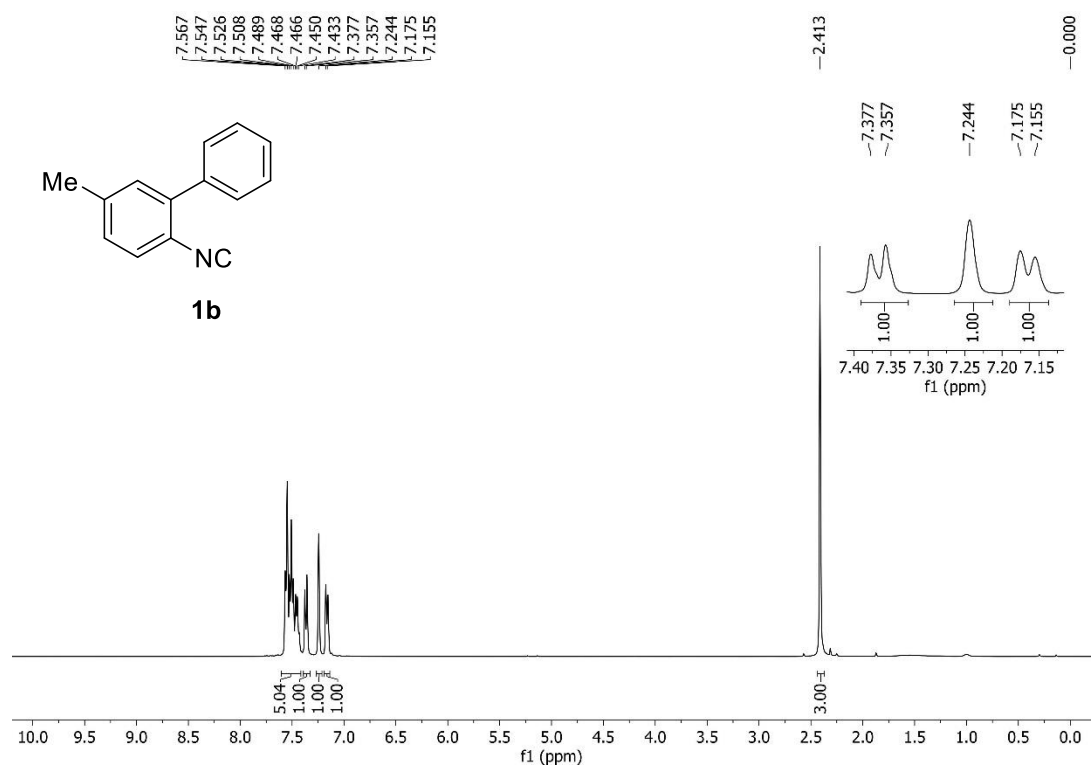 $^{13}\text{C}$  NMR spectrum of **1b** (100 MHz,  $\text{CDCl}_3$ )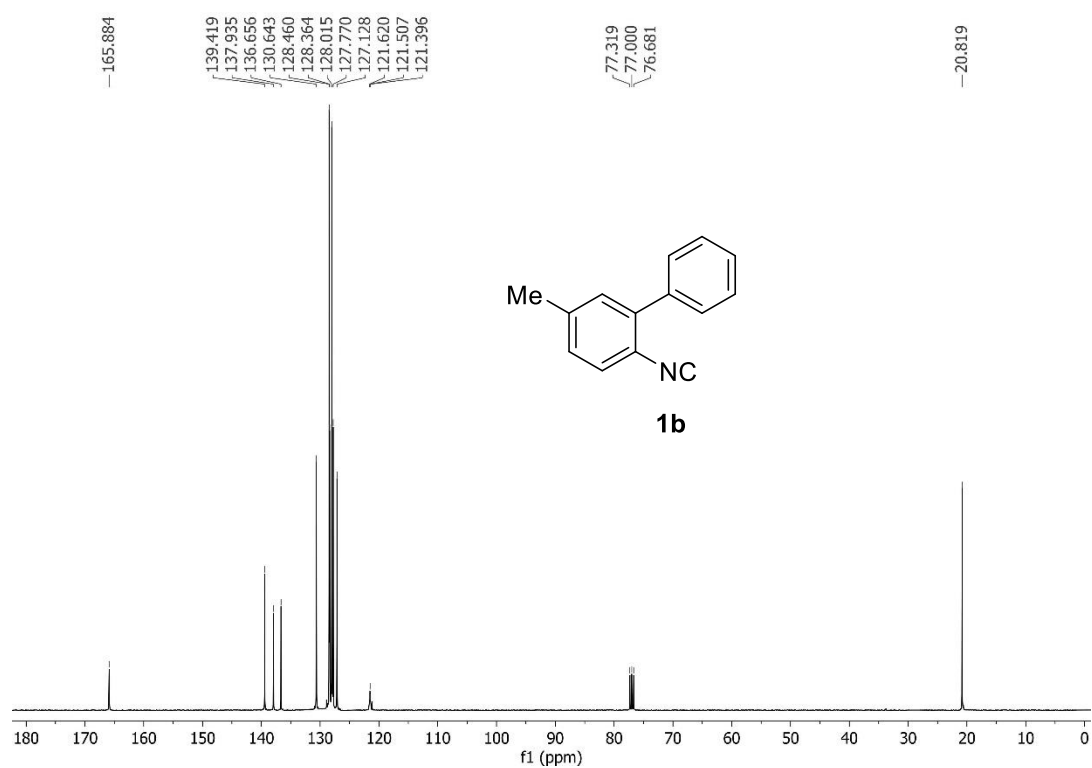

$^1\text{H}$  NMR spectrum of **1c** (400 MHz,  $\text{CDCl}_3$ )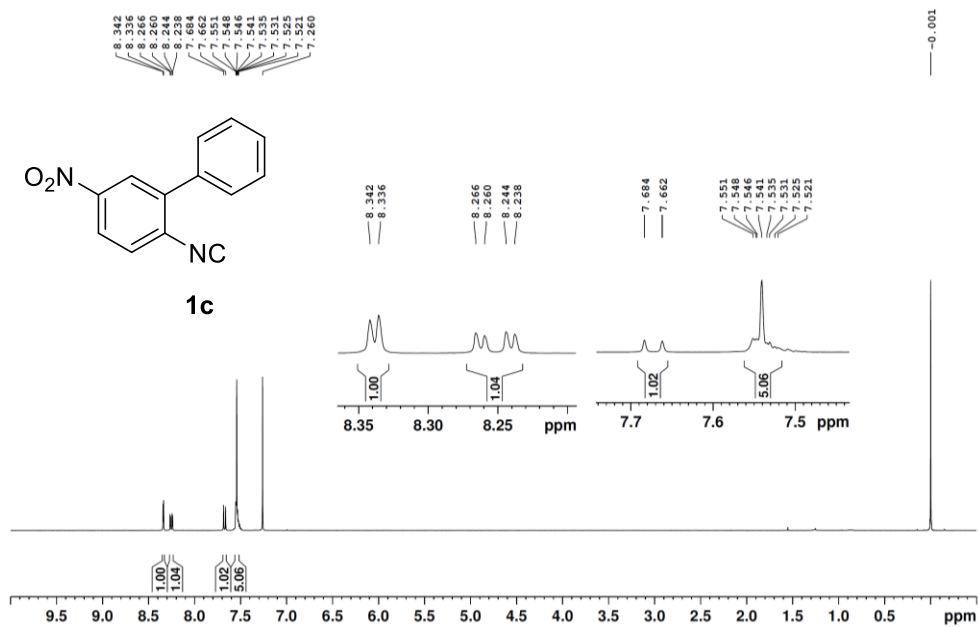 $^{13}\text{C}$  NMR spectrum of **1c** (100 MHz,  $\text{CDCl}_3$ )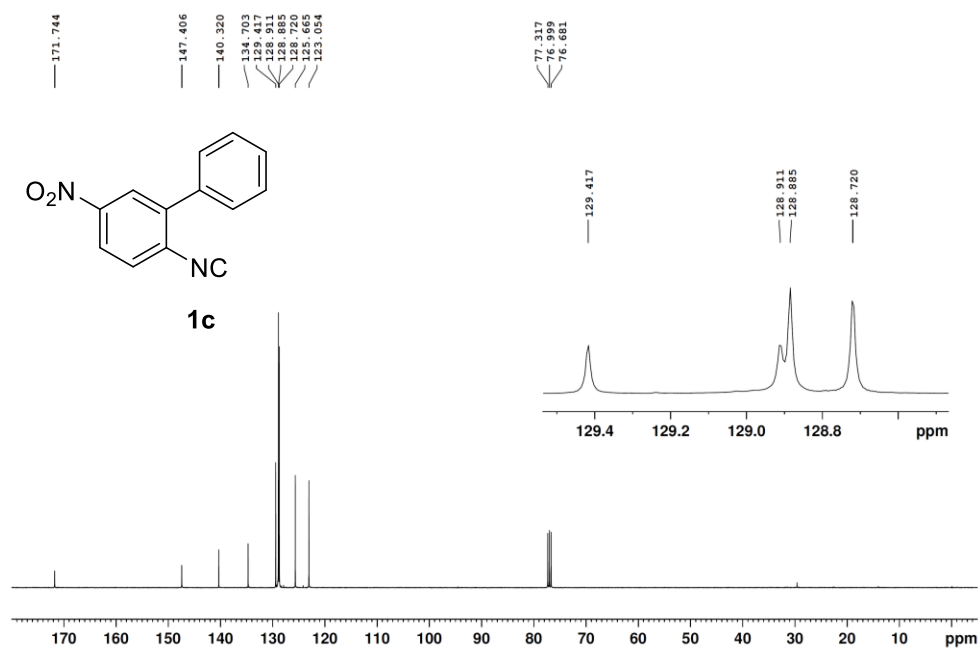

<sup>1</sup>H NMR spectrum of **1d** (400 MHz, CDCl<sub>3</sub>)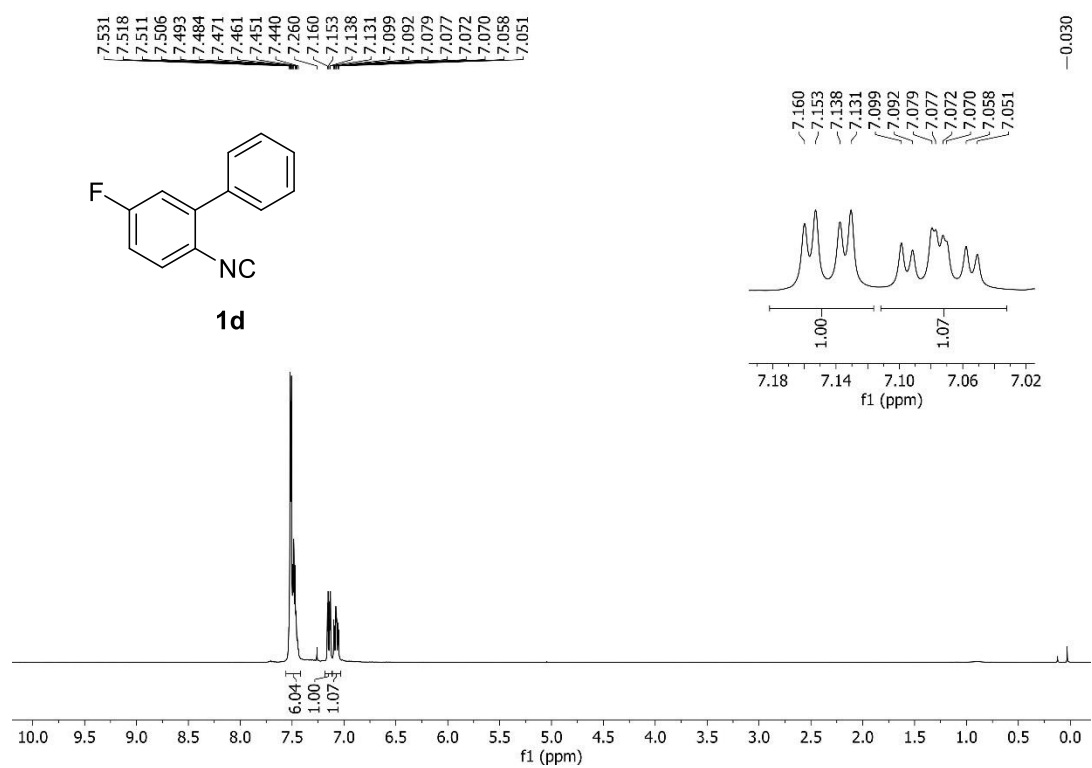<sup>13</sup>C NMR spectrum of **1d** (100 MHz, CDCl<sub>3</sub>)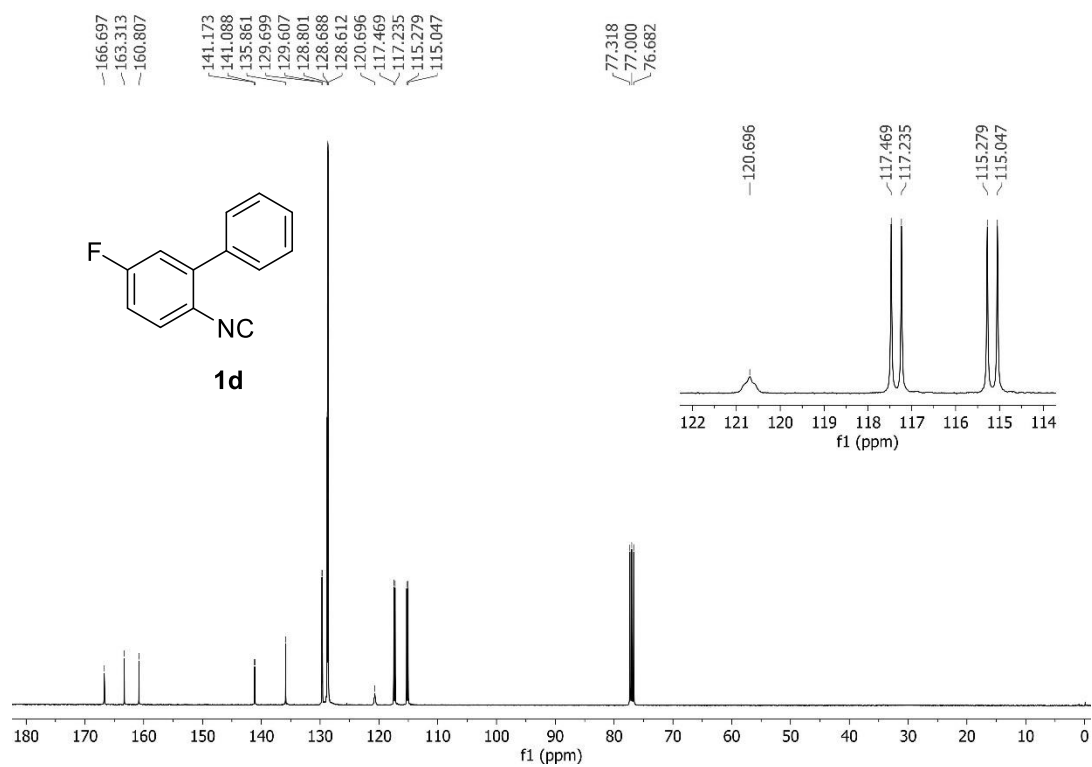



$^{19}\text{F}$  NMR spectrum of **1d** (376 MHz,  $\text{CDCl}_3$ )

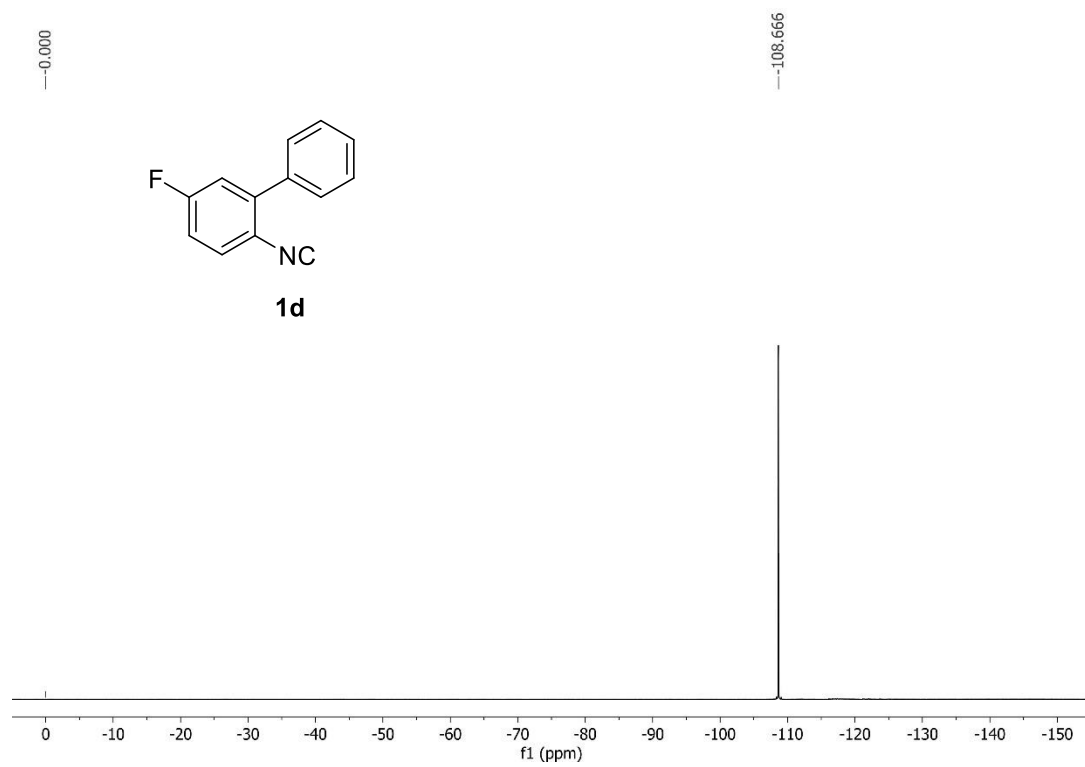

<sup>1</sup>H NMR spectrum of **1e** (400 MHz, CDCl<sub>3</sub>)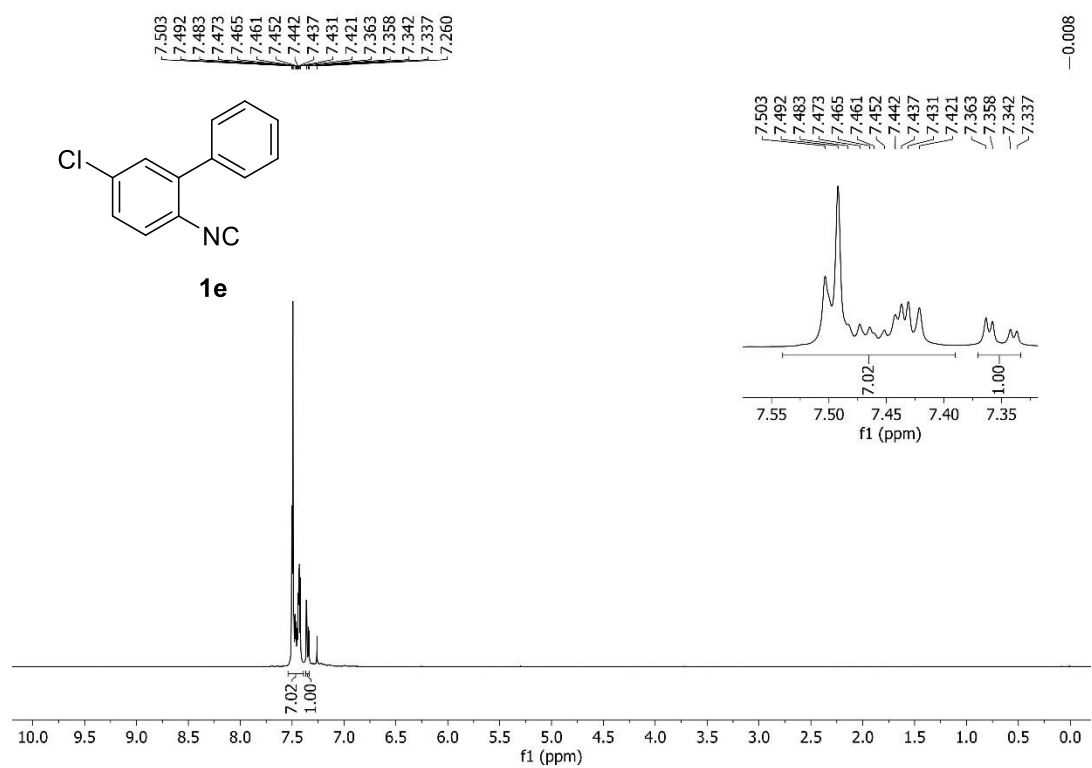<sup>13</sup>C NMR spectrum of **1e** (100 MHz, CDCl<sub>3</sub>)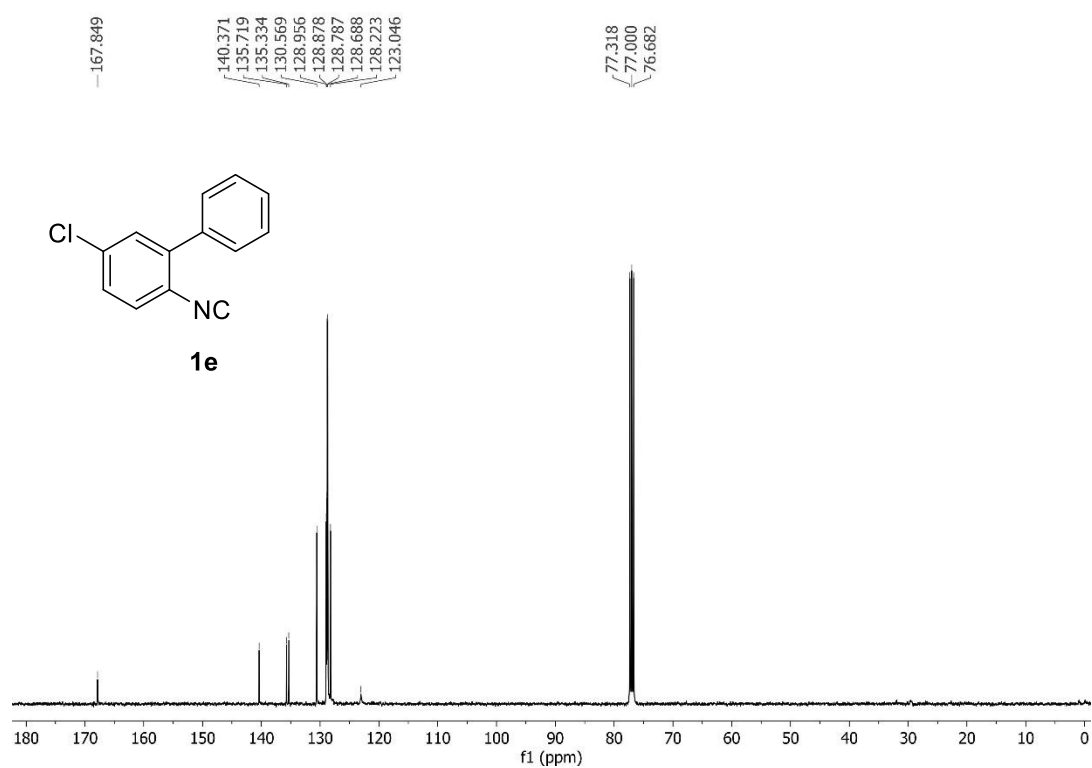

<sup>1</sup>H NMR spectrum of **1f** (400 MHz, CDCl<sub>3</sub>)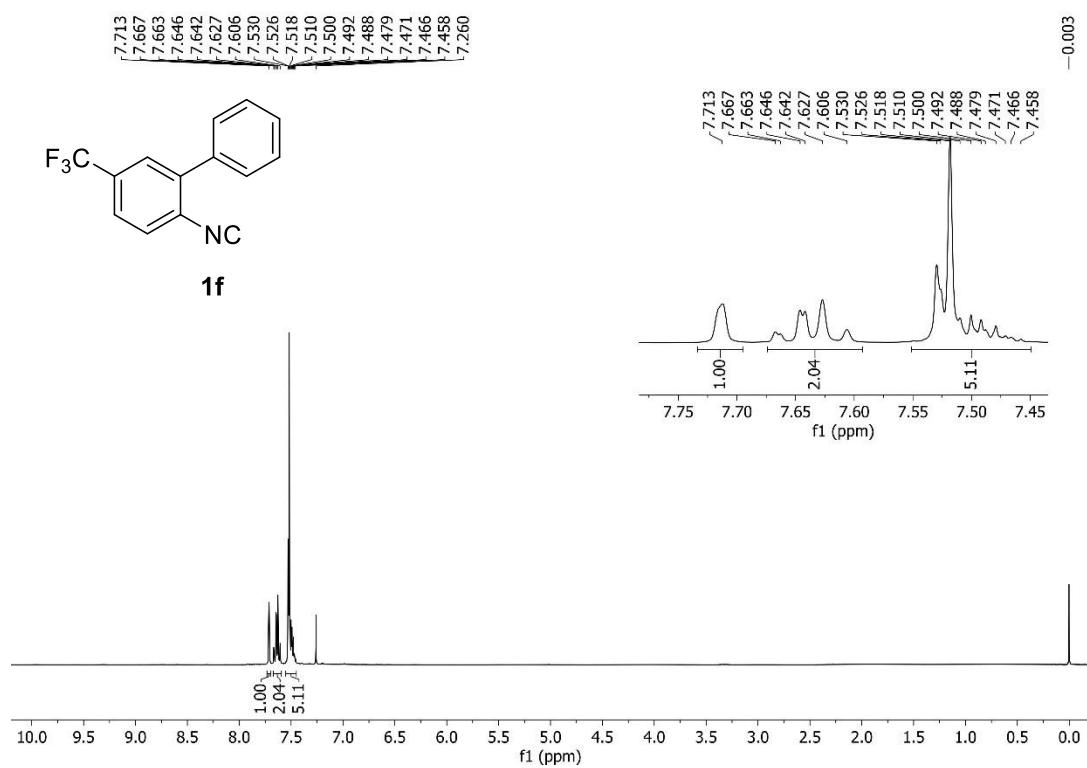<sup>13</sup>C NMR spectrum of **1f** (100 MHz, CDCl<sub>3</sub>)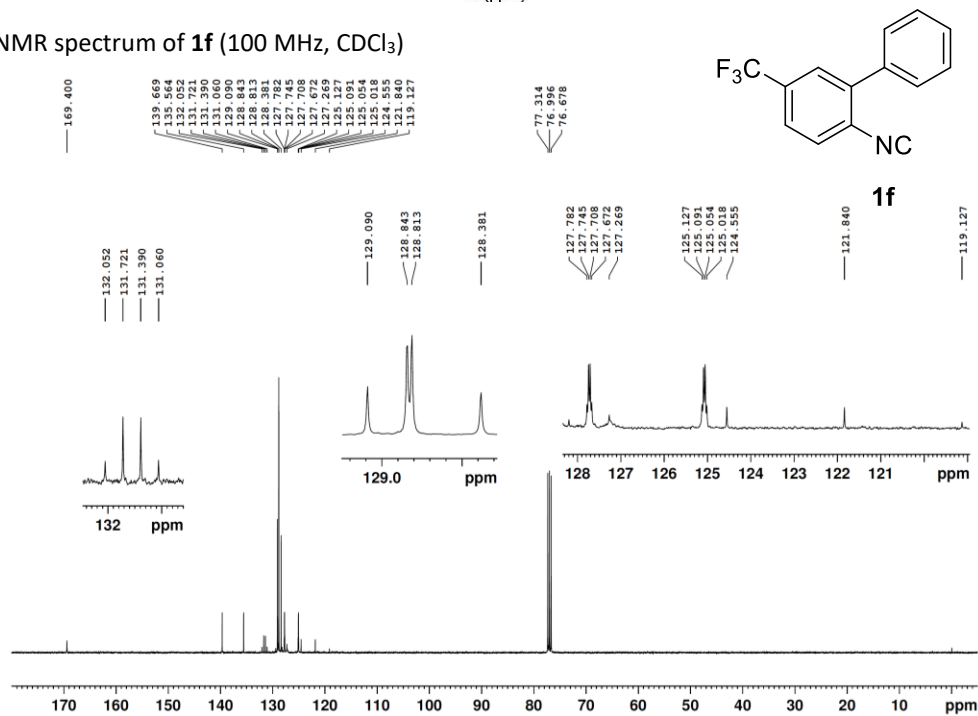

$^{19}\text{F}$  NMR spectrum of **1f** (376 MHz,  $\text{CDCl}_3$ )

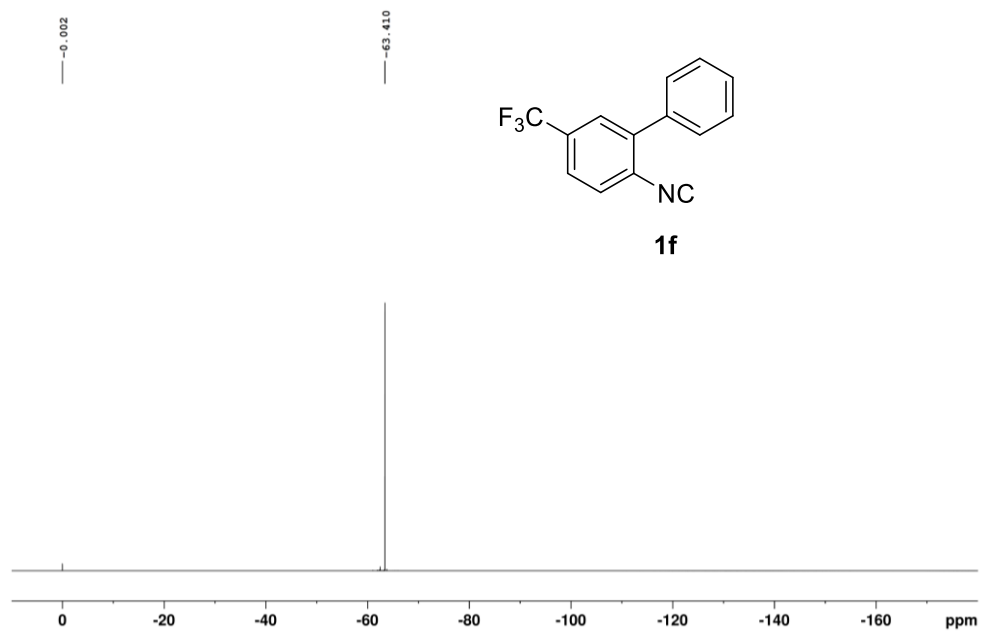

$^1\text{H}$  NMR spectrum of **1g** (400 MHz,  $\text{CDCl}_3$ )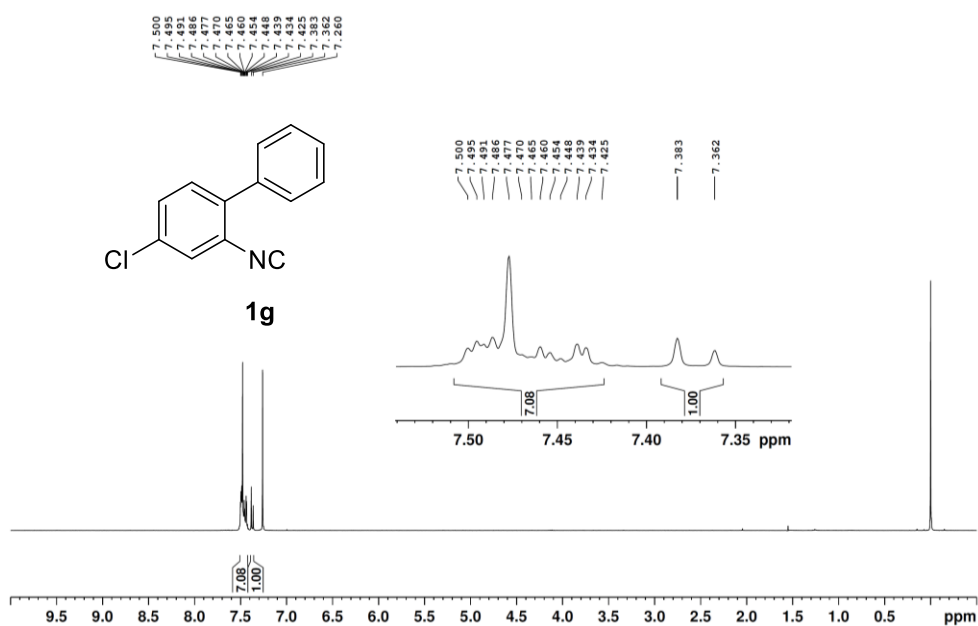 $^{13}\text{C}$  NMR spectrum of **1g** (100 MHz,  $\text{CDCl}_3$ )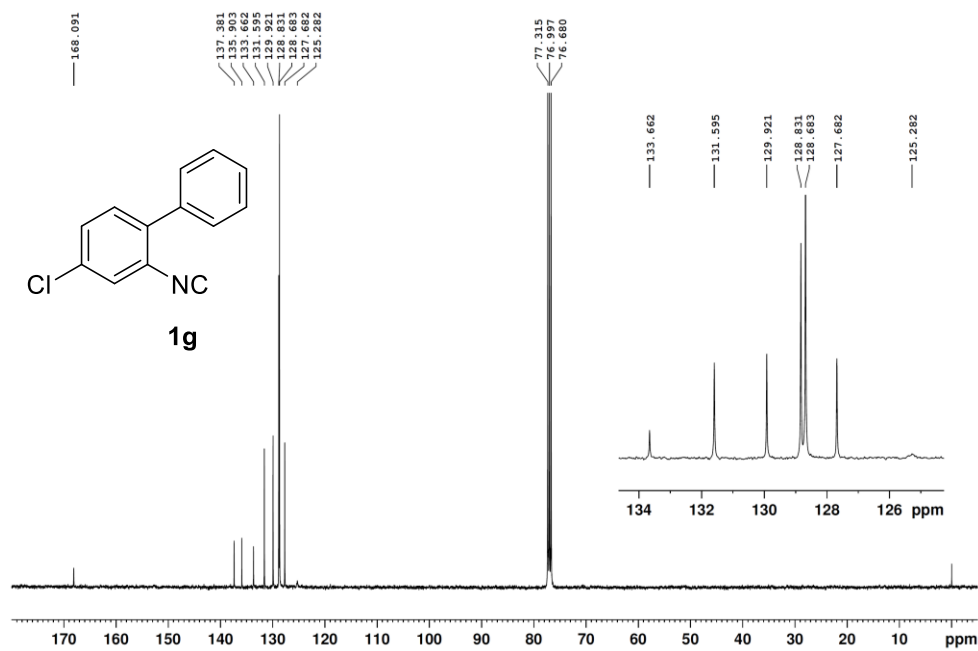

$^1\text{H}$  NMR spectrum of **1h** (400 MHz,  $\text{CDCl}_3$ )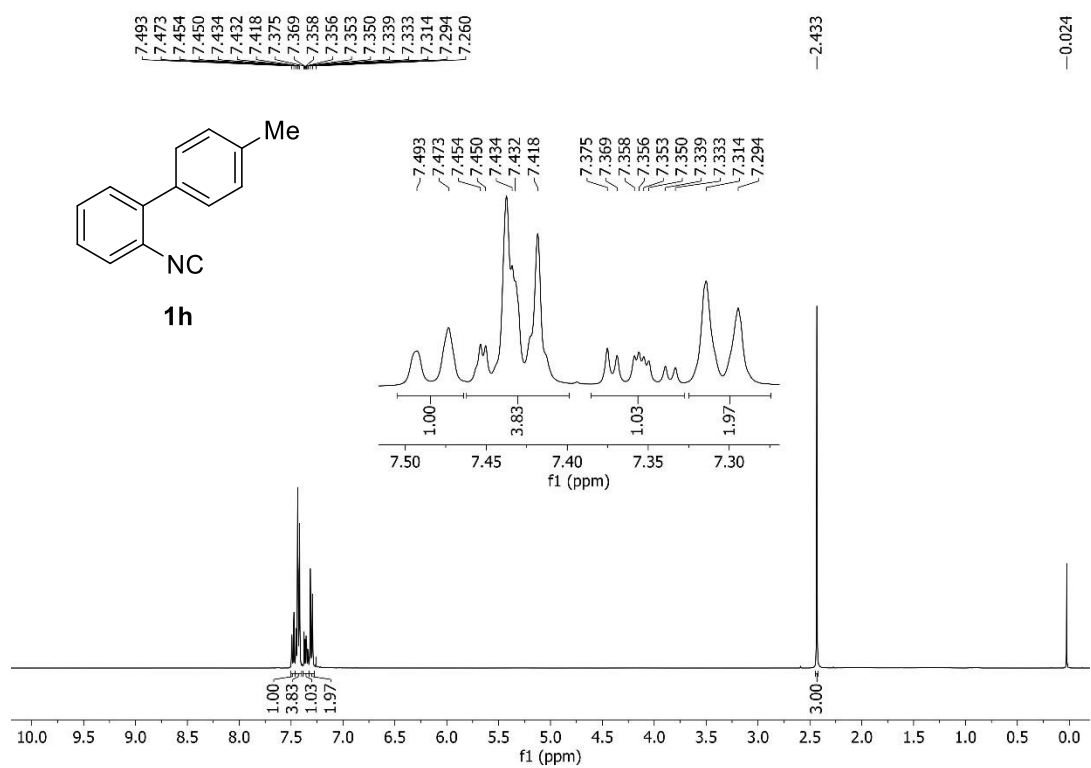 $^{13}\text{C}$  NMR spectrum of **1h** (100 MHz,  $\text{CDCl}_3$ )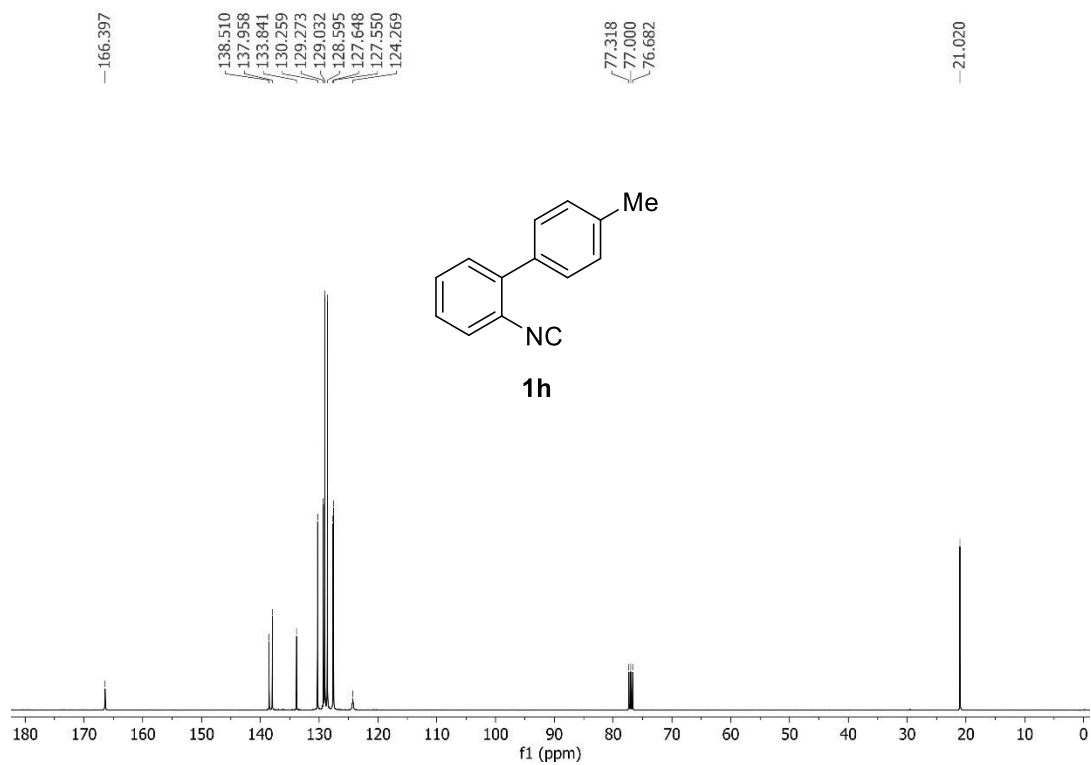

<sup>1</sup>H NMR spectrum of **1i** (400 MHz, CDCl<sub>3</sub>)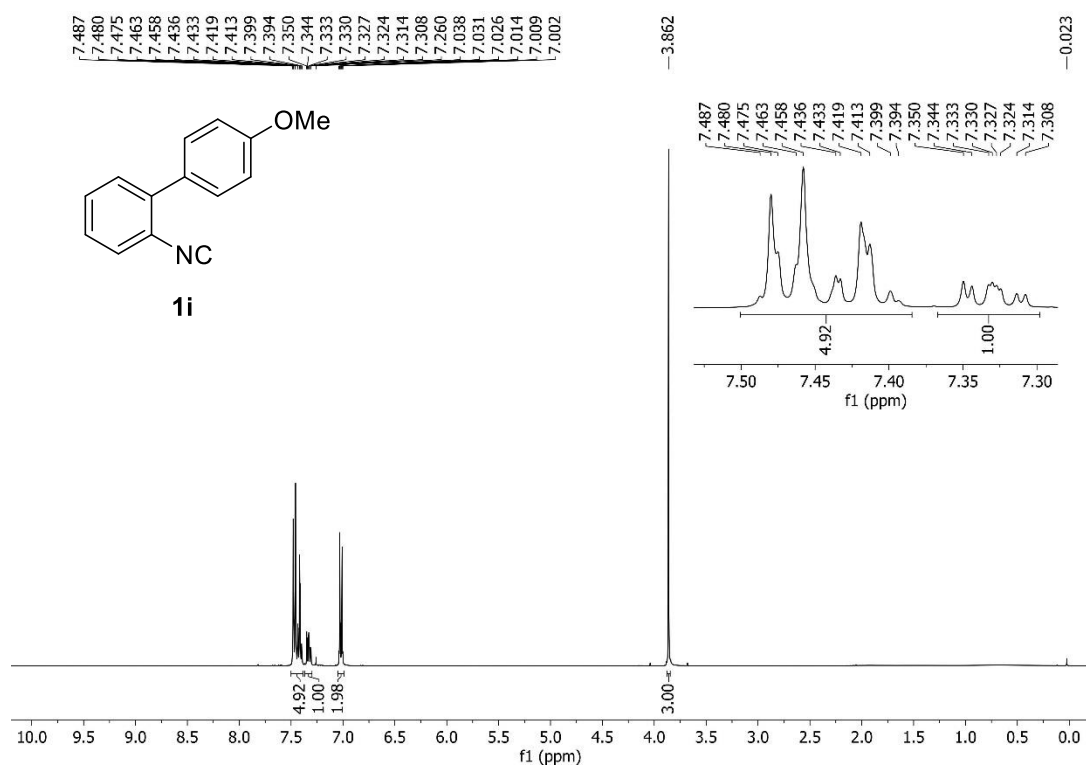<sup>13</sup>C NMR spectrum of **1i** (100 MHz, CDCl<sub>3</sub>)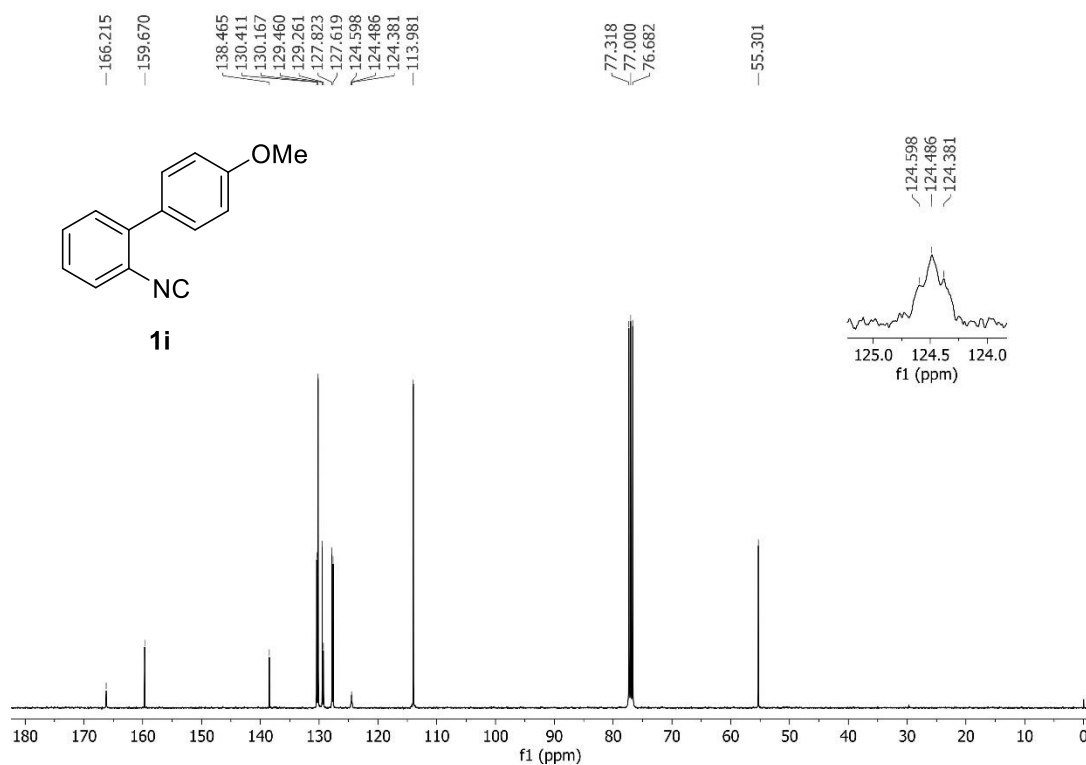

<sup>1</sup>H NMR spectrum of **1j** (400 MHz, CDCl<sub>3</sub>)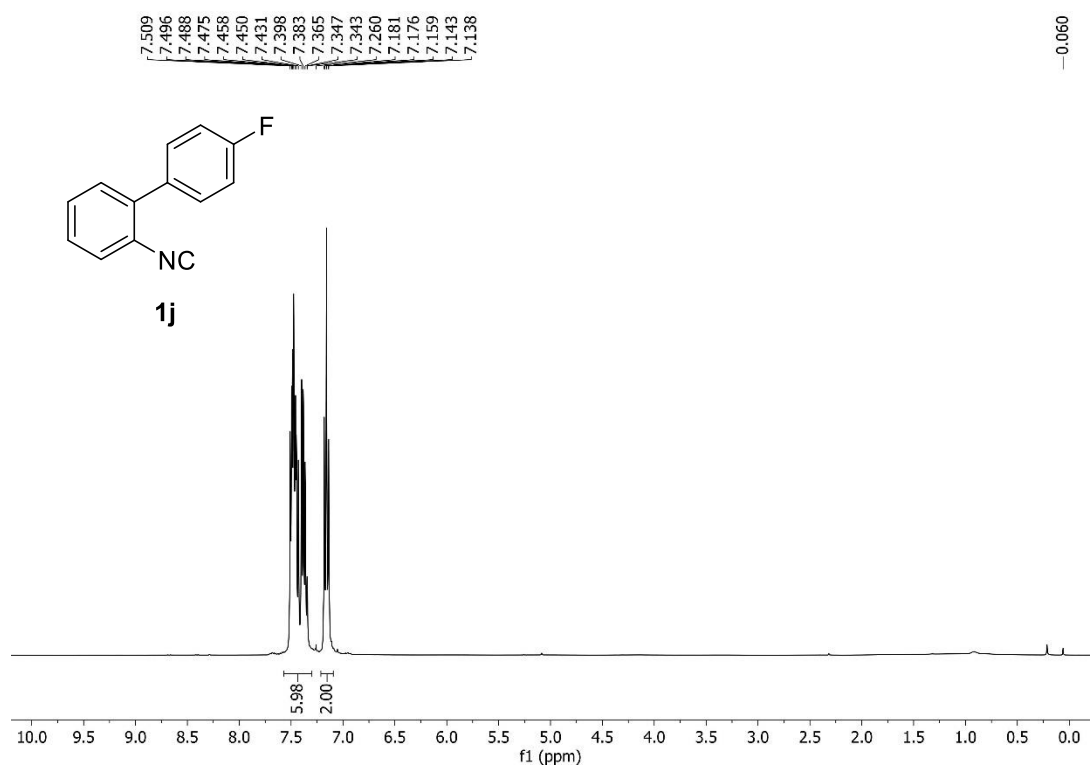<sup>13</sup>C NMR spectrum of **1j** (100 MHz, CDCl<sub>3</sub>)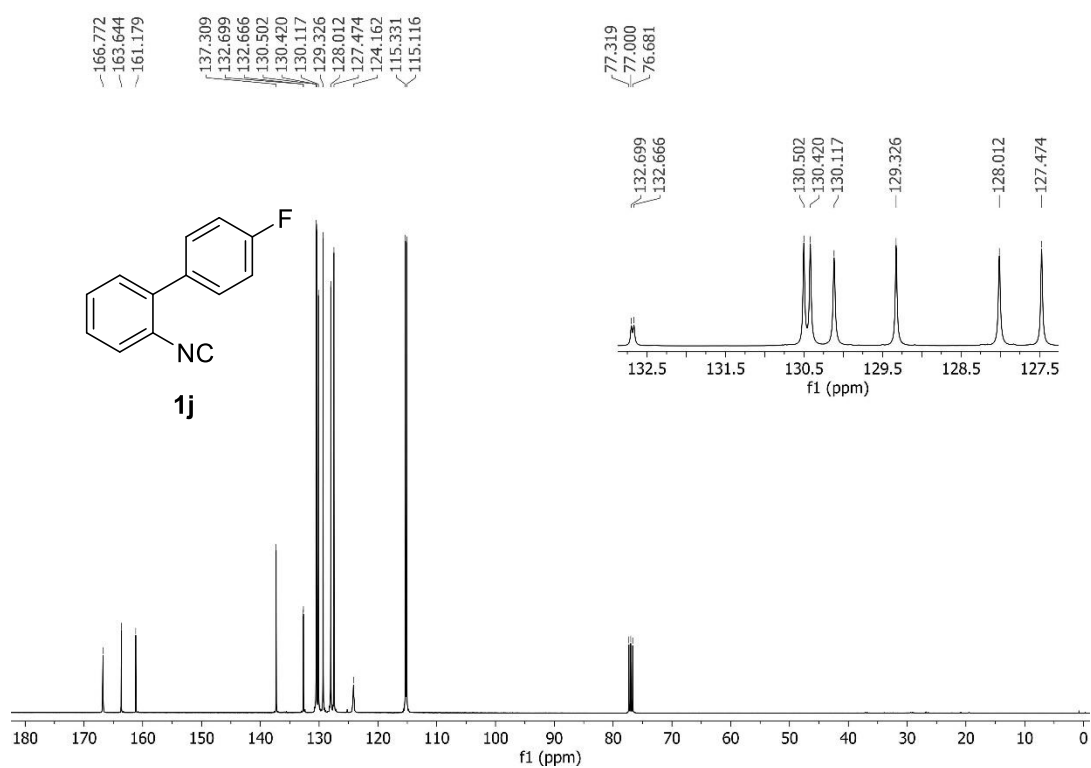



$^{19}\text{F}$  NMR spectrum of **1j** (376 MHz,  $\text{CDCl}_3$ )

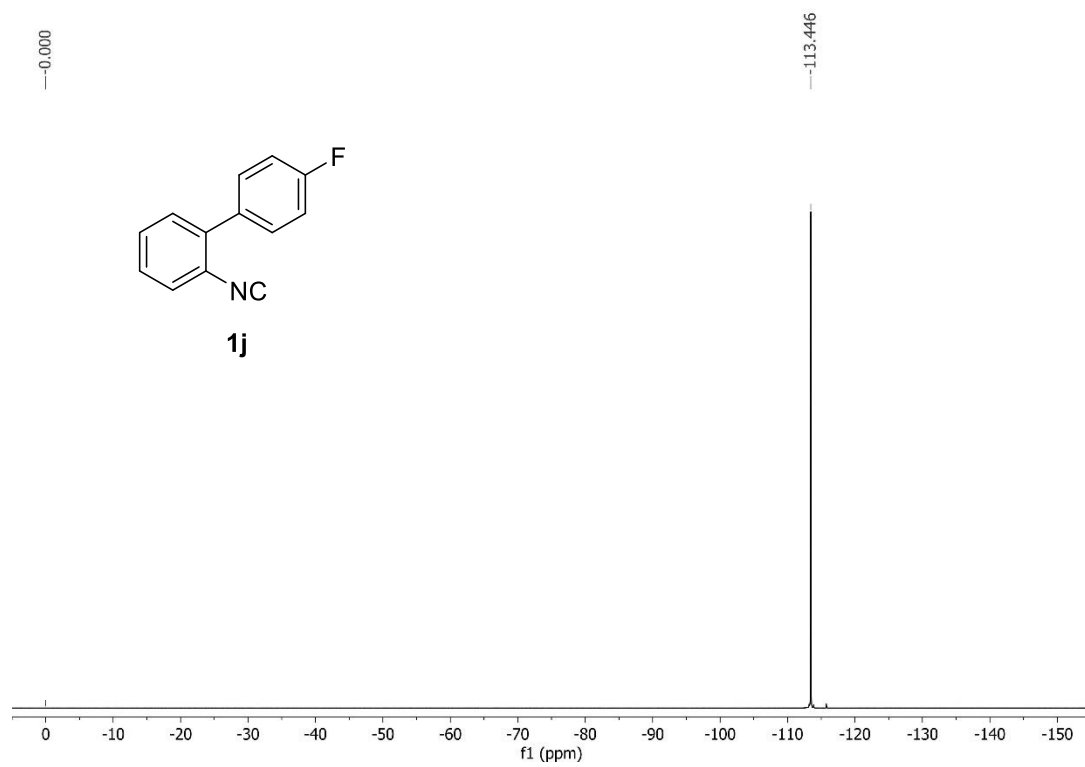

<sup>1</sup>H NMR spectrum of **1k** (400 MHz, CDCl<sub>3</sub>)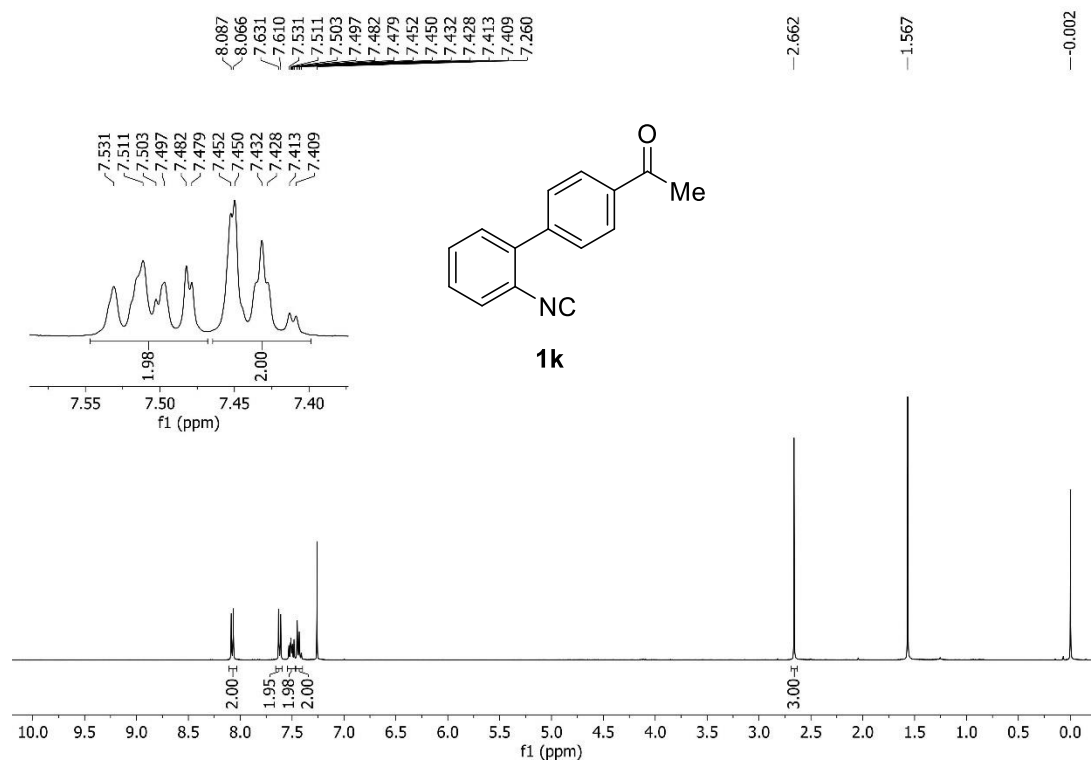<sup>13</sup>C NMR spectrum of **1k** (100 MHz, CDCl<sub>3</sub>)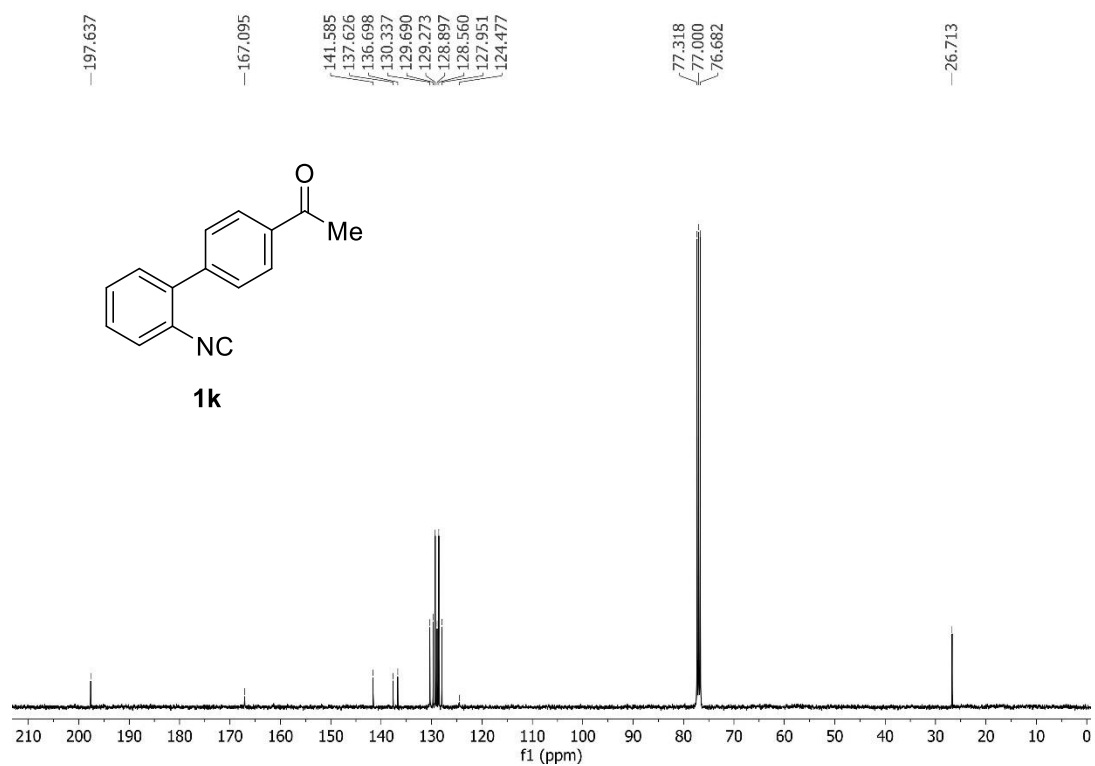

<sup>1</sup>H NMR spectrum of **1I** (400 MHz, CDCl<sub>3</sub>)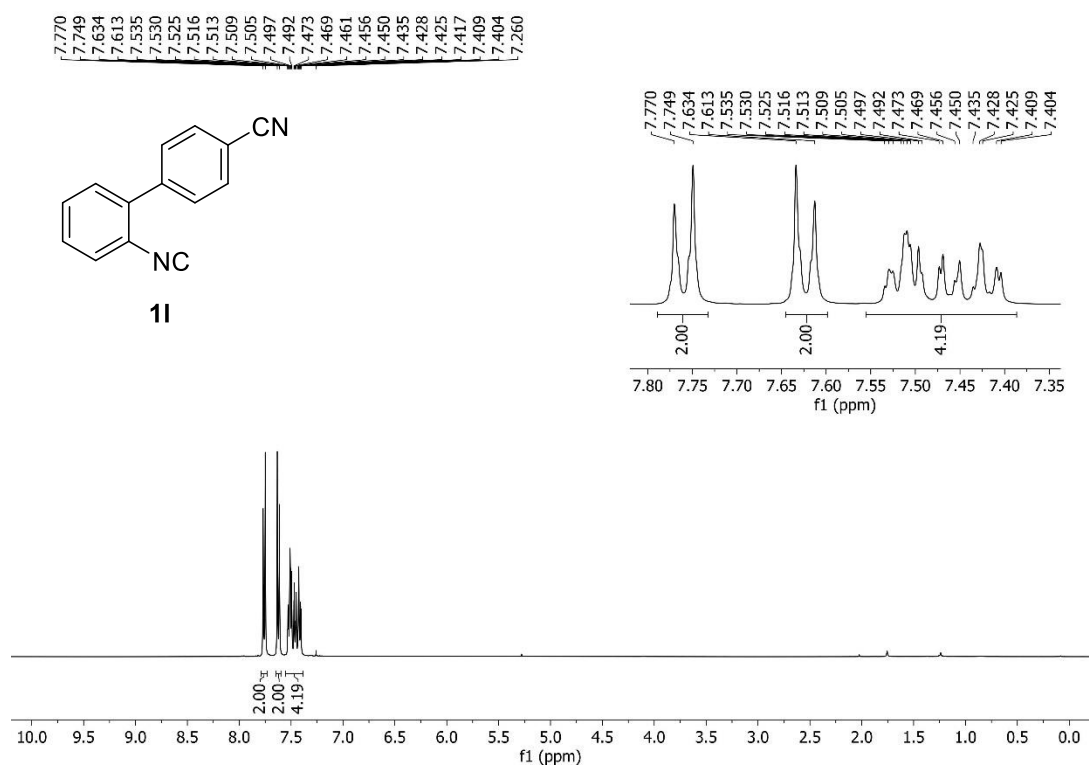<sup>13</sup>C NMR spectrum of **1I** (100 MHz, CDCl<sub>3</sub>)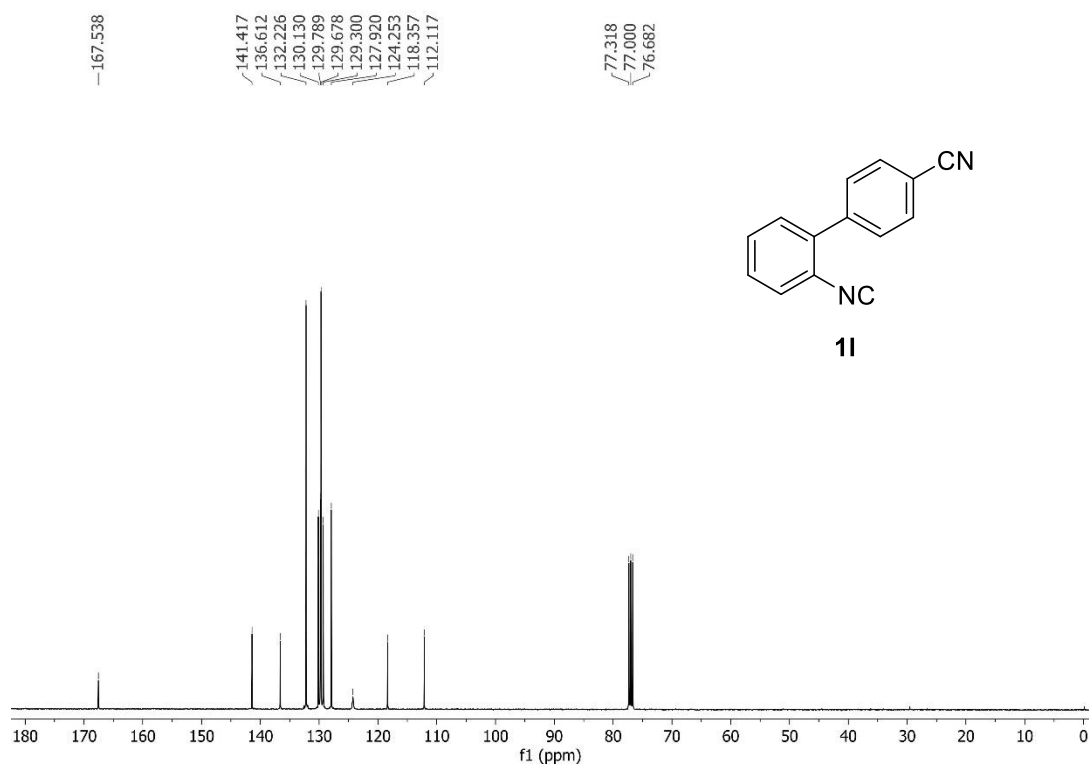

<sup>1</sup>H NMR spectrum of **1m** (400 MHz, CDCl<sub>3</sub>)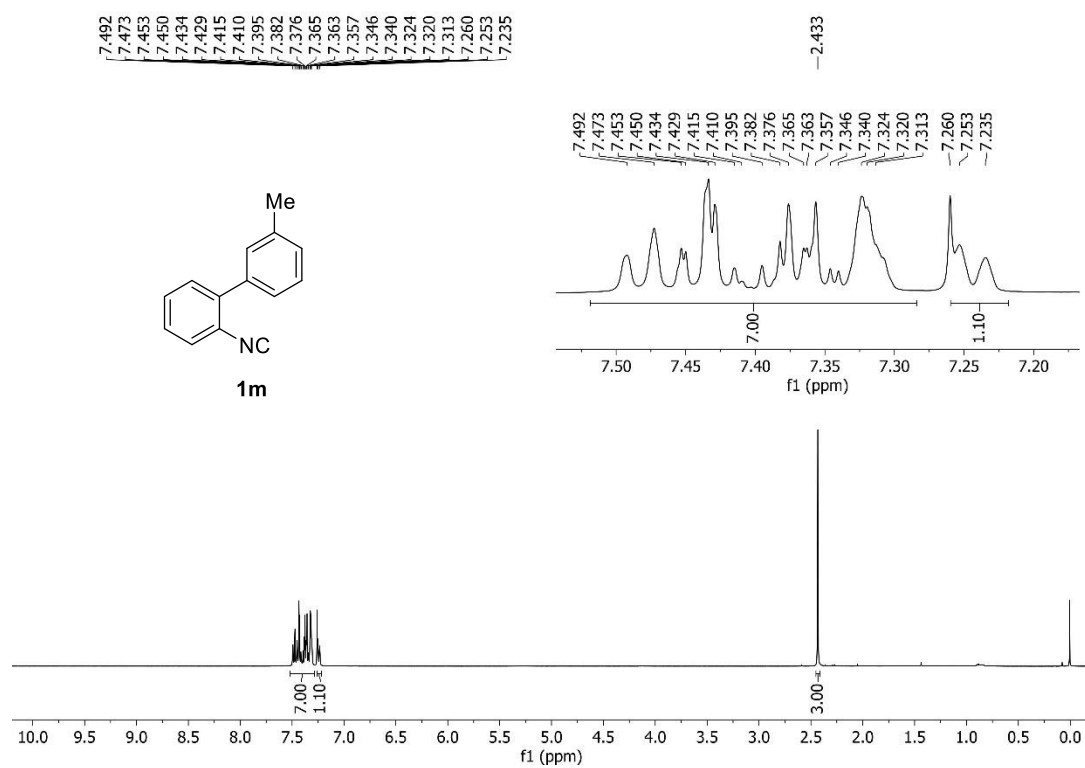<sup>13</sup>C NMR spectrum of **1m** (100 MHz, CDCl<sub>3</sub>)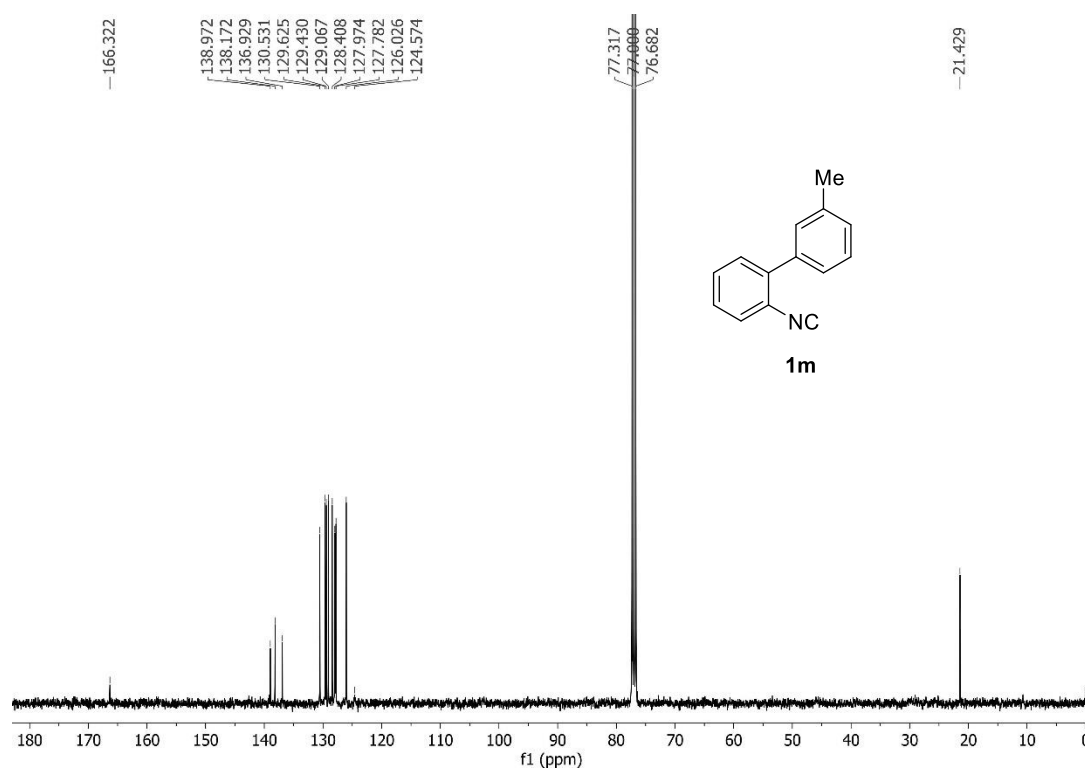

$^1\text{H}$  NMR spectrum of **1n** (400 MHz,  $\text{CDCl}_3$ )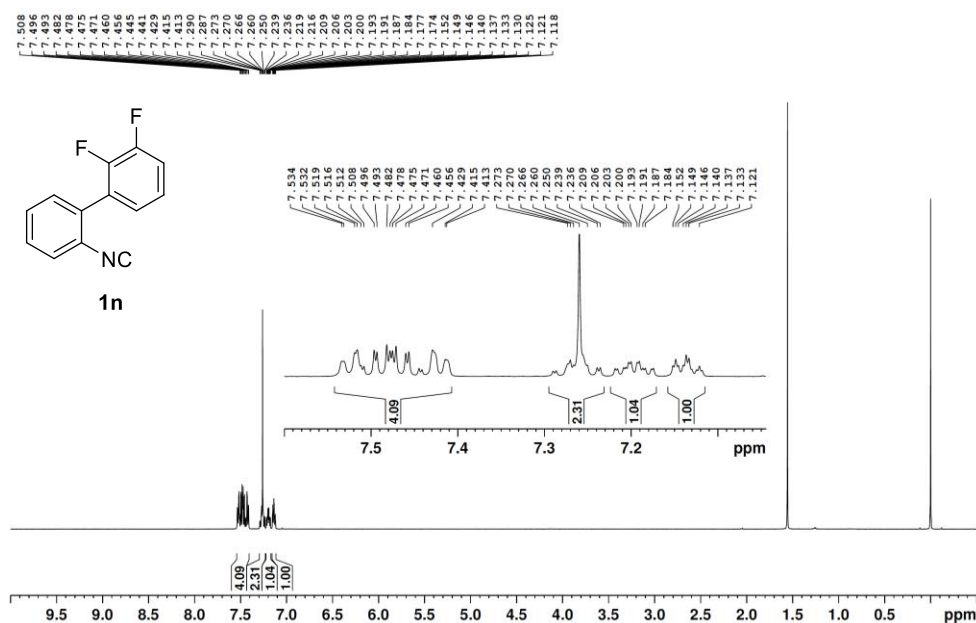 $^{13}\text{C}$  NMR spectrum of **1n** (100 MHz,  $\text{CDCl}_3$ )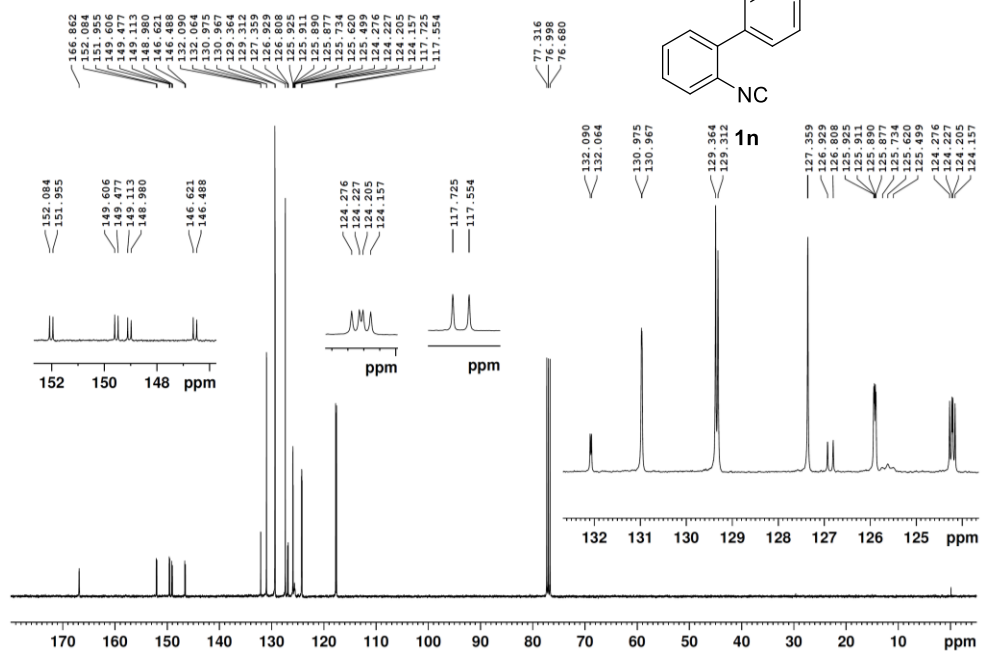

$^{19}\text{F}$  NMR spectrum of **1n** (470 MHz,  $\text{CDCl}_3$ )

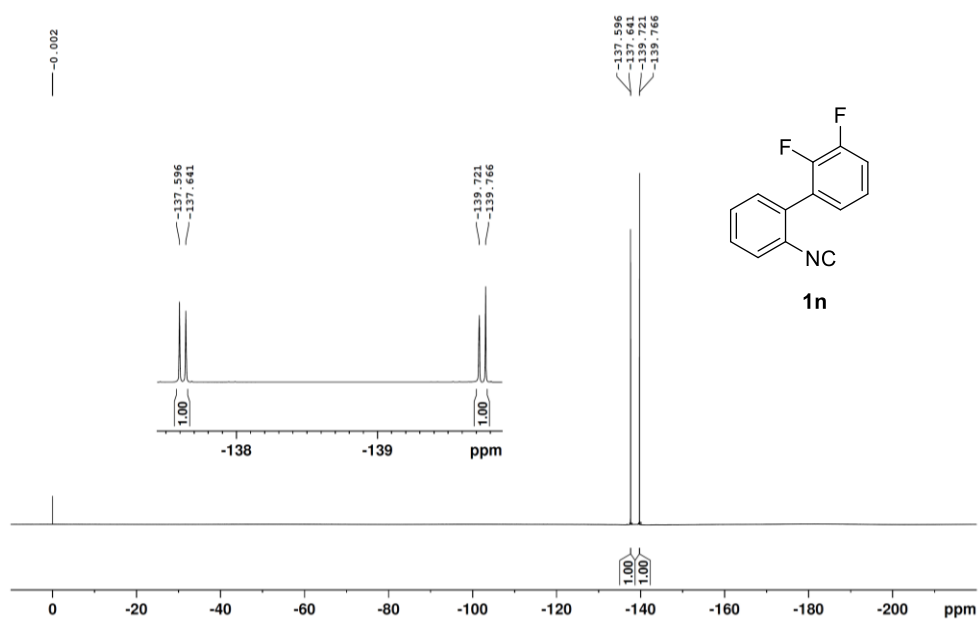

<sup>1</sup>H NMR spectrum of **1o** (500 MHz, CDCl<sub>3</sub>)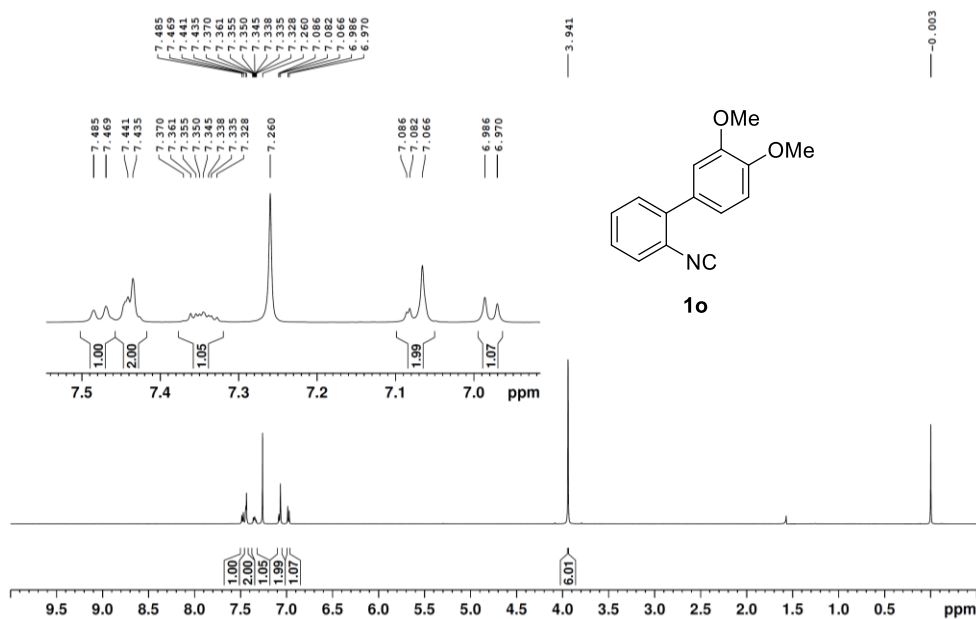<sup>13</sup>C NMR spectrum of **1o** (125 MHz, CDCl<sub>3</sub>)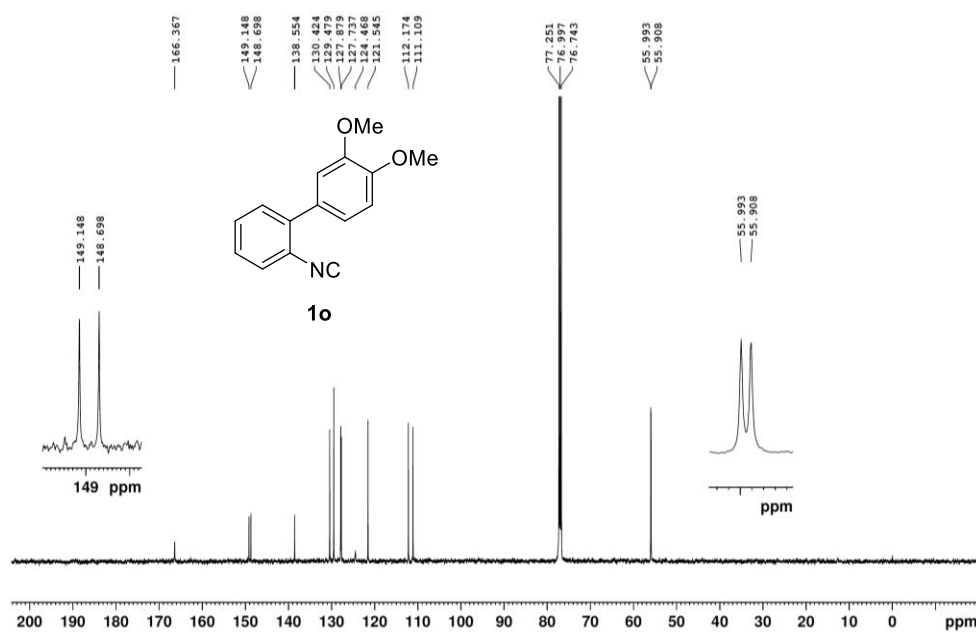

<sup>1</sup>H NMR spectrum of **1p** (400 MHz, CDCl<sub>3</sub>)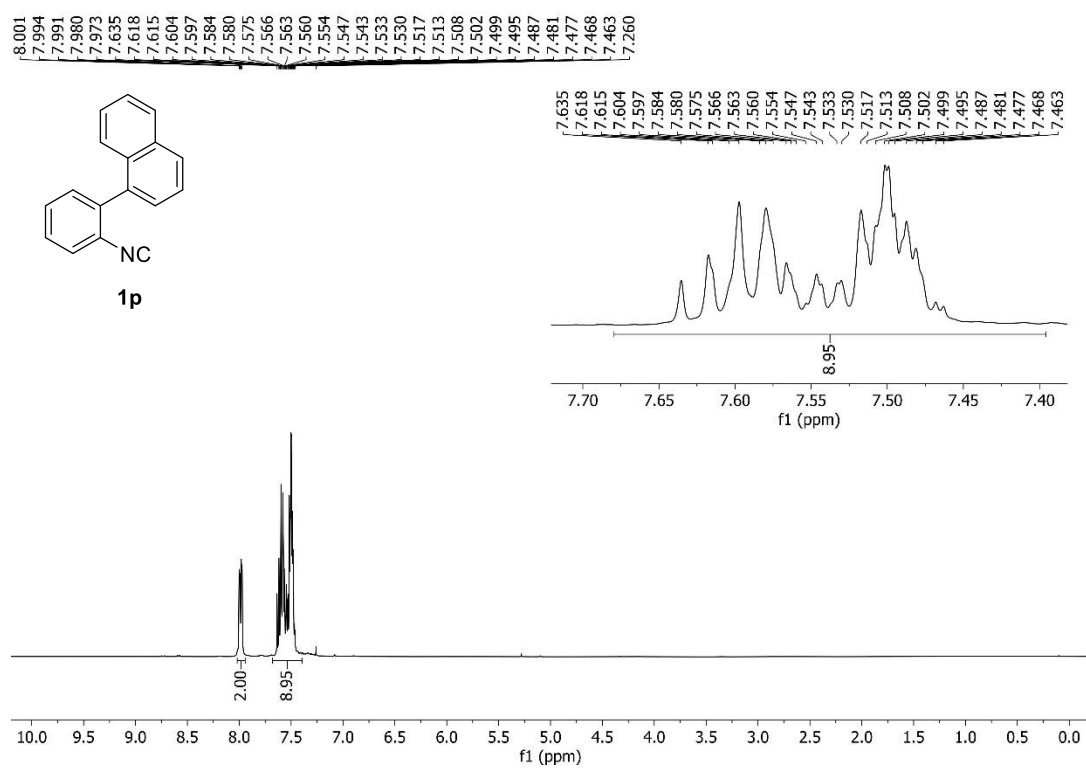<sup>13</sup>C NMR spectrum of **1p** (100 MHz, CDCl<sub>3</sub>)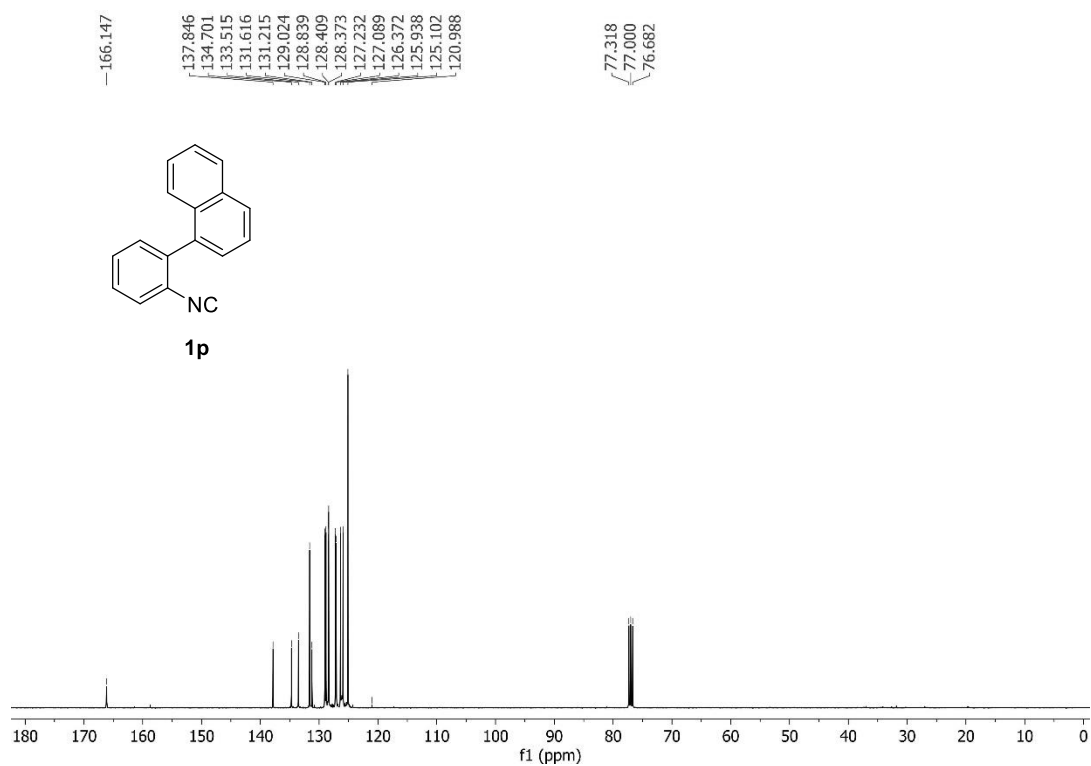



<sup>1</sup>H NMR spectrum of **1q** (400 MHz, CDCl<sub>3</sub>)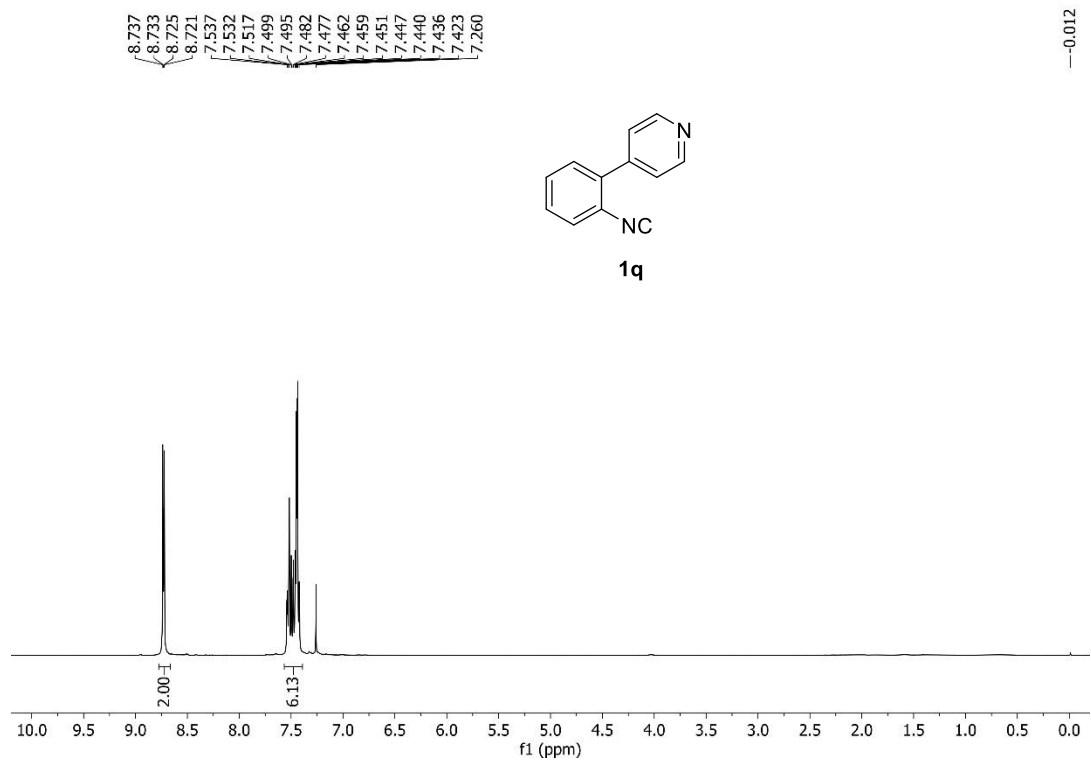<sup>13</sup>C NMR spectrum of **1q** (100 MHz, CDCl<sub>3</sub>)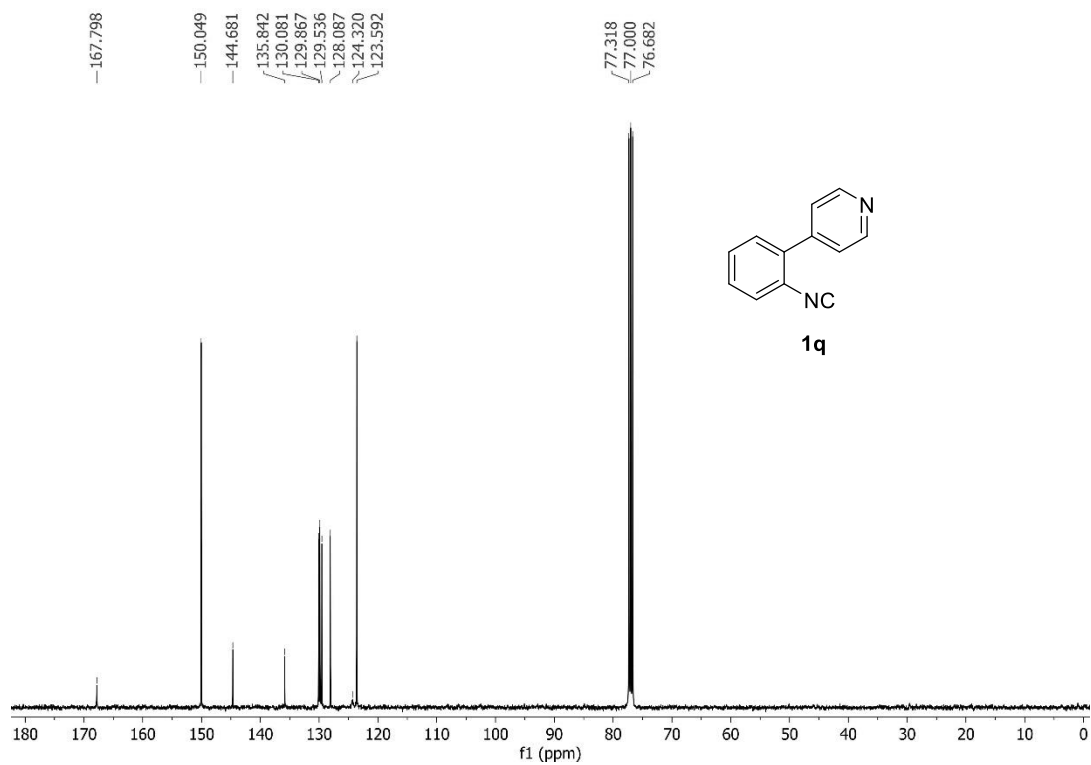

<sup>1</sup>H NMR spectrum of **1r** (400 MHz, CDCl<sub>3</sub>)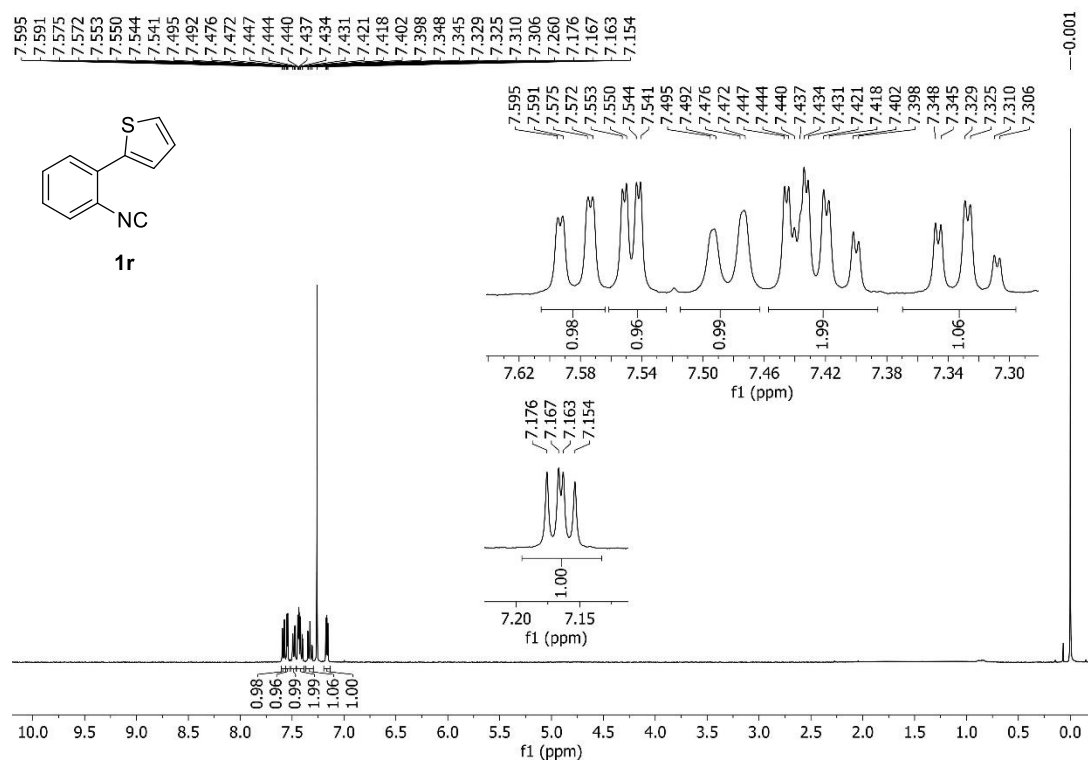<sup>13</sup>C NMR spectrum of **1r** (100 MHz, CDCl<sub>3</sub>)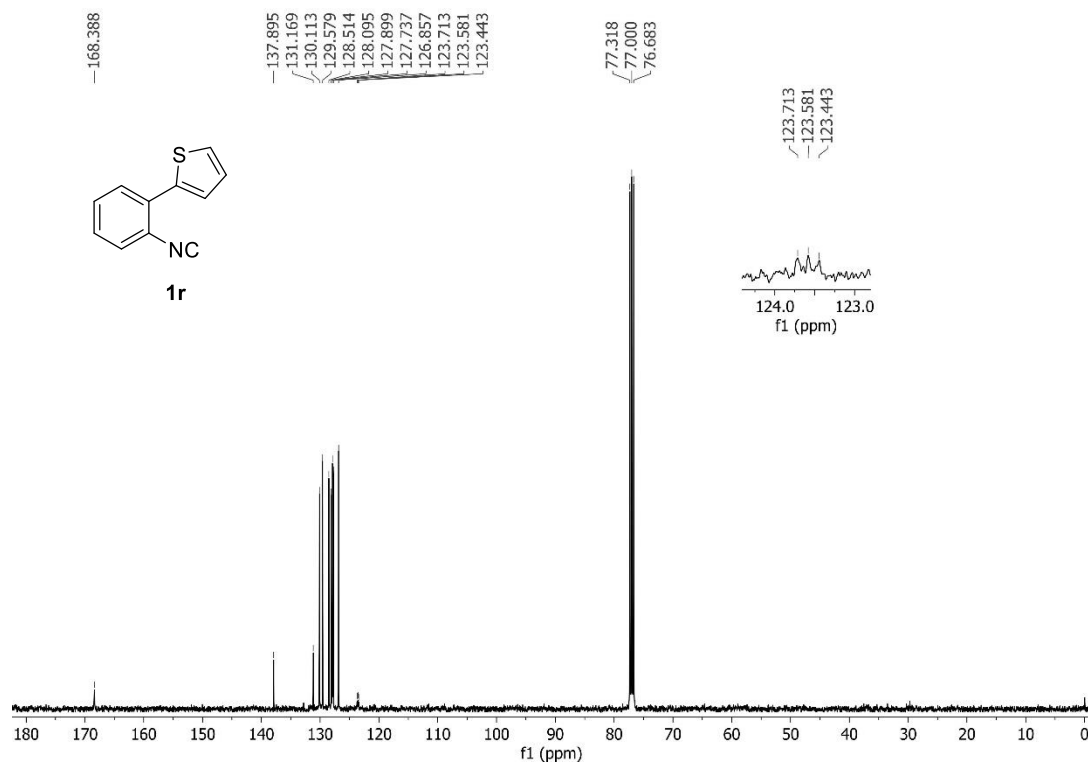

$^1\text{H}$  NMR spectrum of **1s** (400 MHz,  $\text{CDCl}_3$ )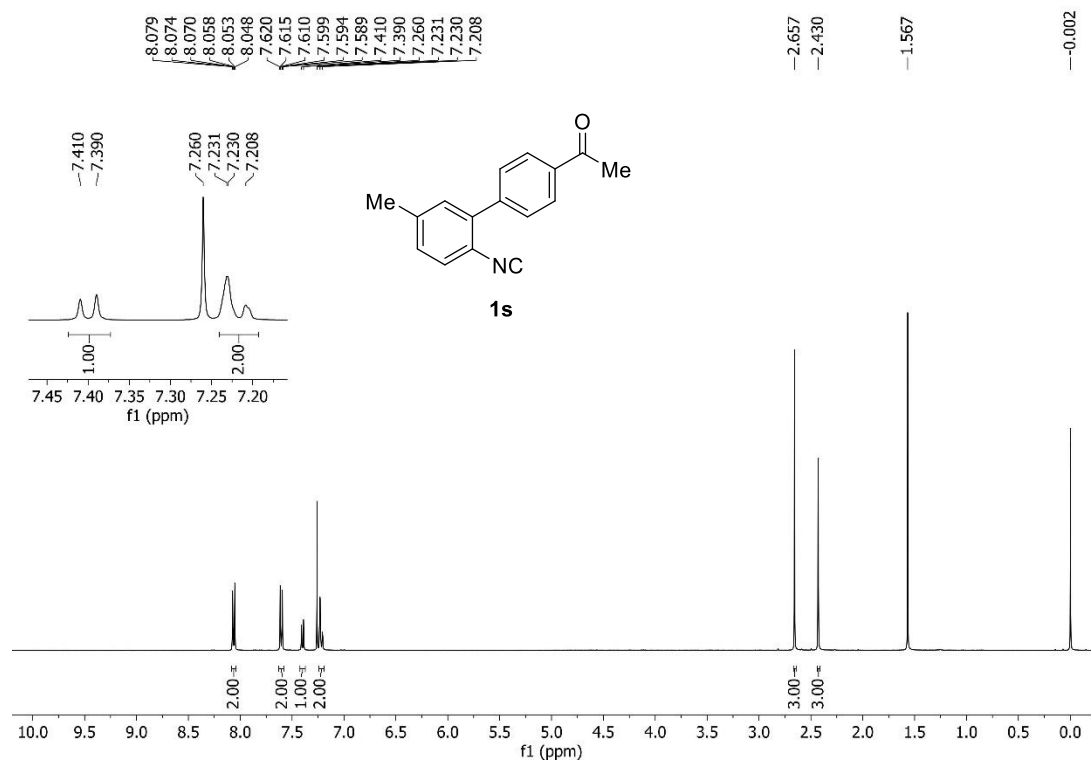 $^{13}\text{C}$  NMR spectrum of **1s** (100 MHz,  $\text{CDCl}_3$ )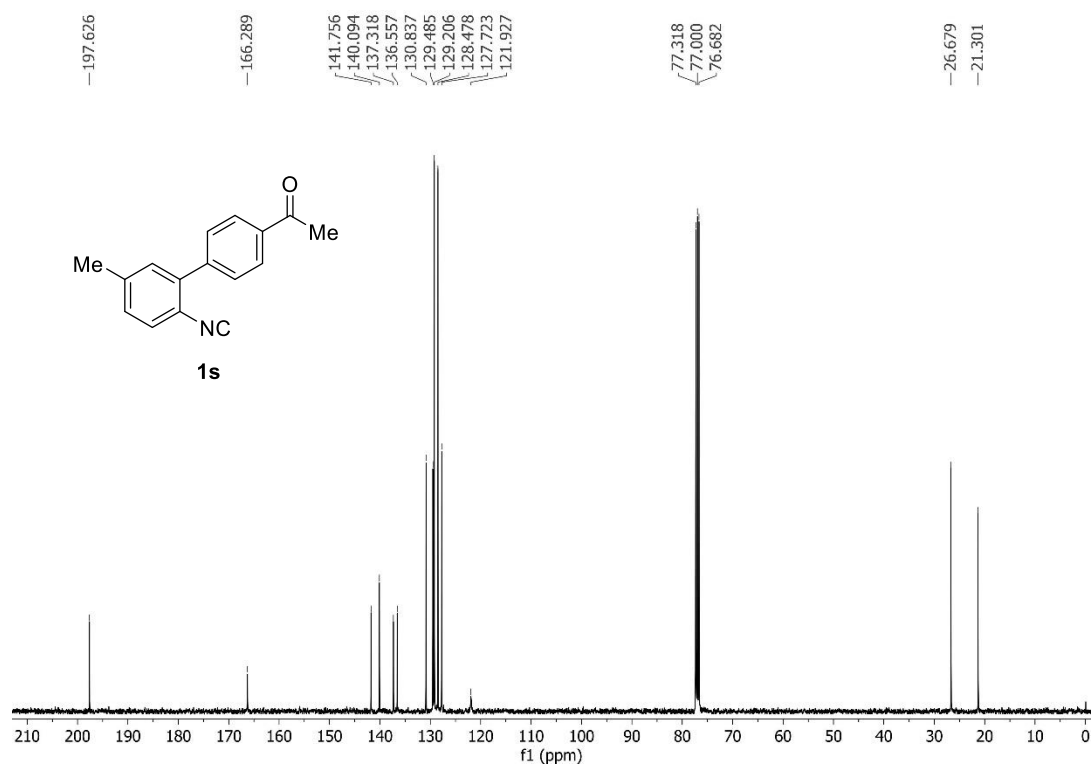

## 8. NMR spectra of 6-(trifluoromethyl)phenanthridines 3a-3s

<sup>1</sup>H NMR spectrum of **3a** (400 MHz, CDCl<sub>3</sub>)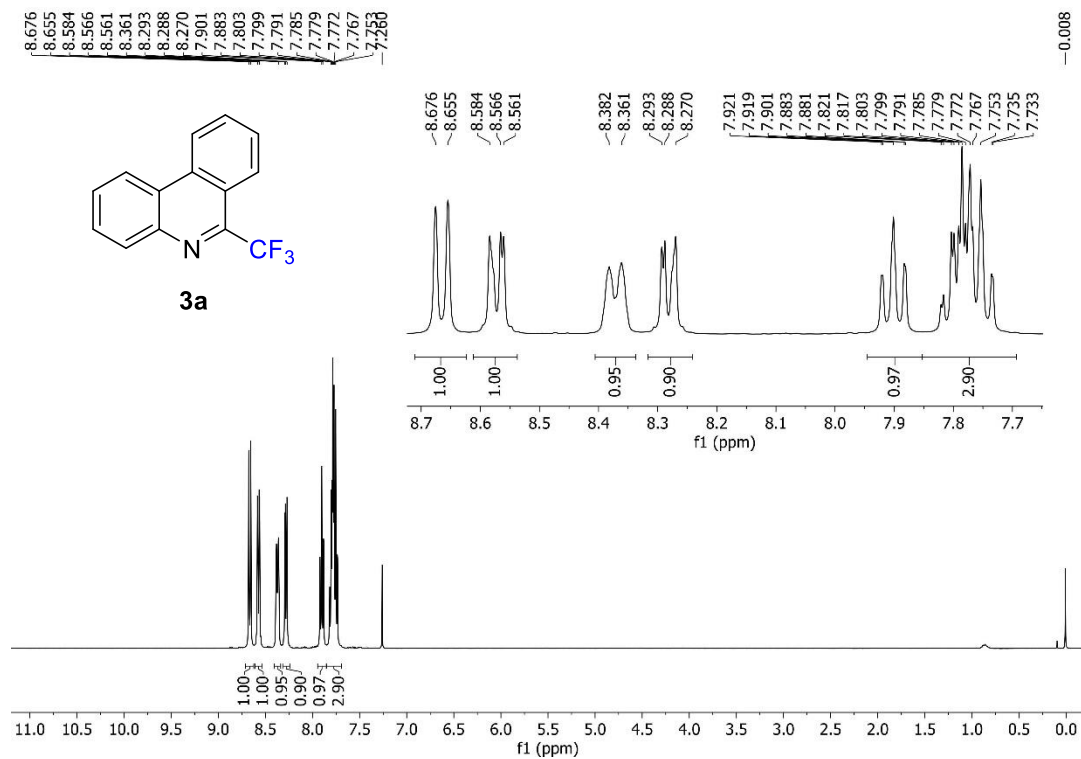<sup>13</sup>C NMR spectrum of **3a** (100 MHz, CDCl<sub>3</sub>)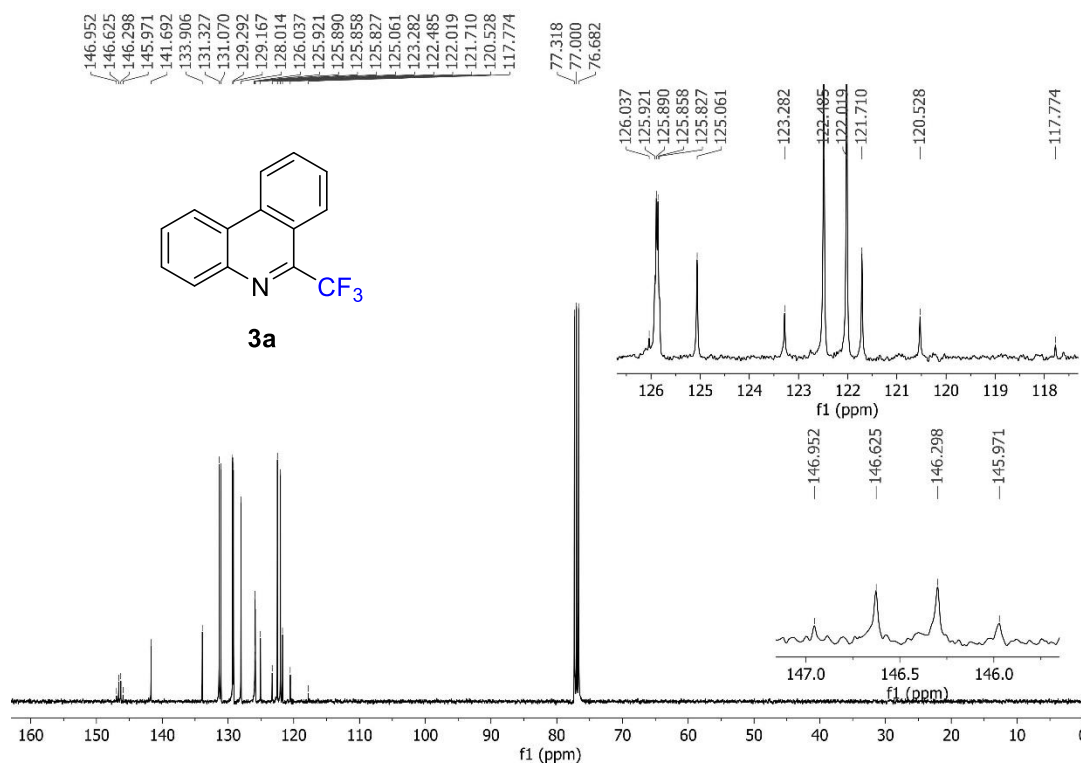

$^{19}\text{F}$  NMR spectrum of **3a** (376 MHz,  $\text{CDCl}_3$ )

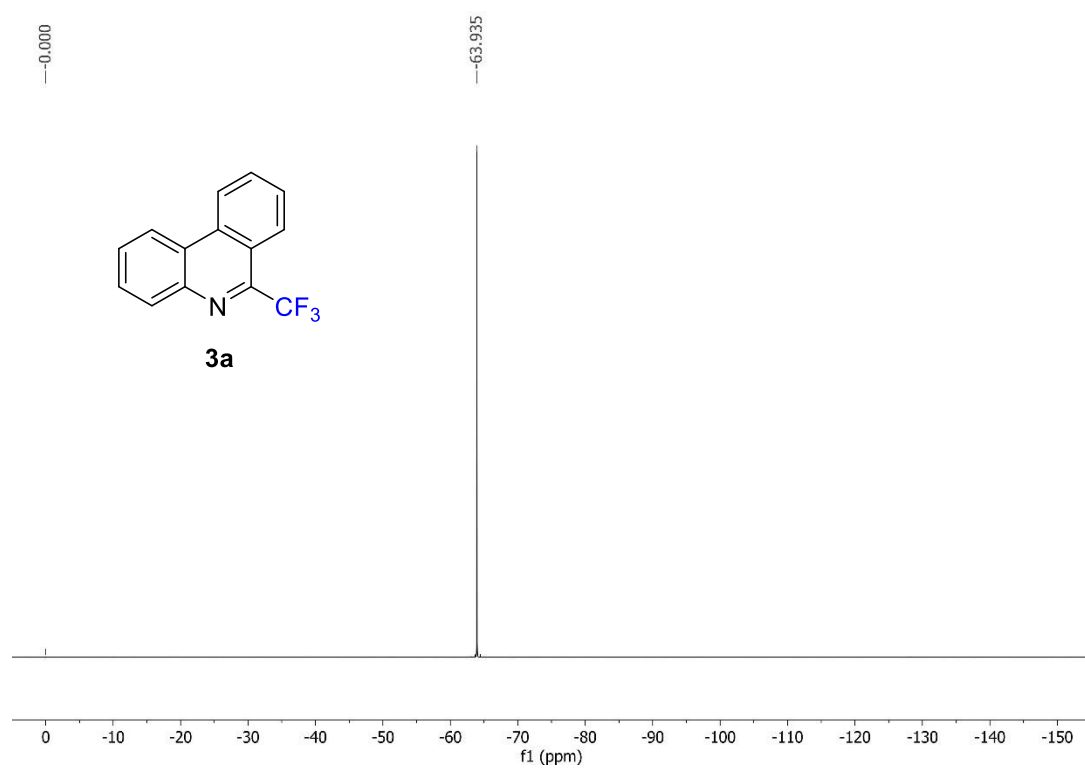

<sup>1</sup>H NMR spectrum of **3b** (400 MHz, CDCl<sub>3</sub>)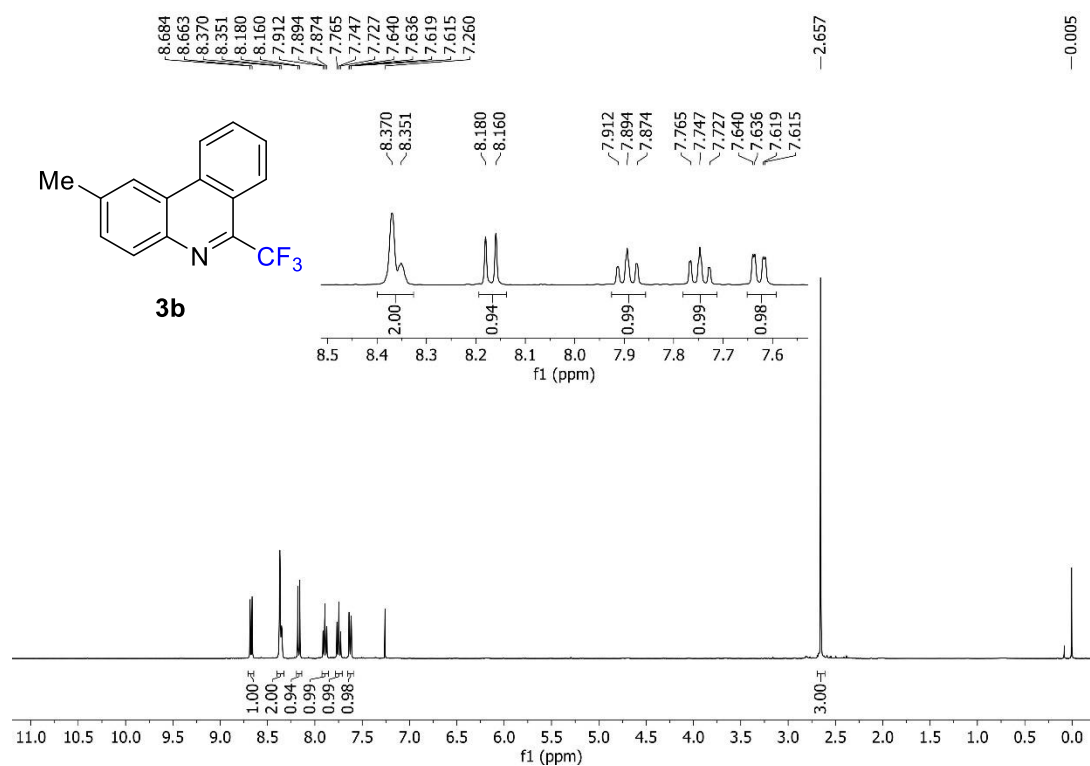<sup>13</sup>C NMR spectrum of **3b** (100 MHz, CDCl<sub>3</sub>)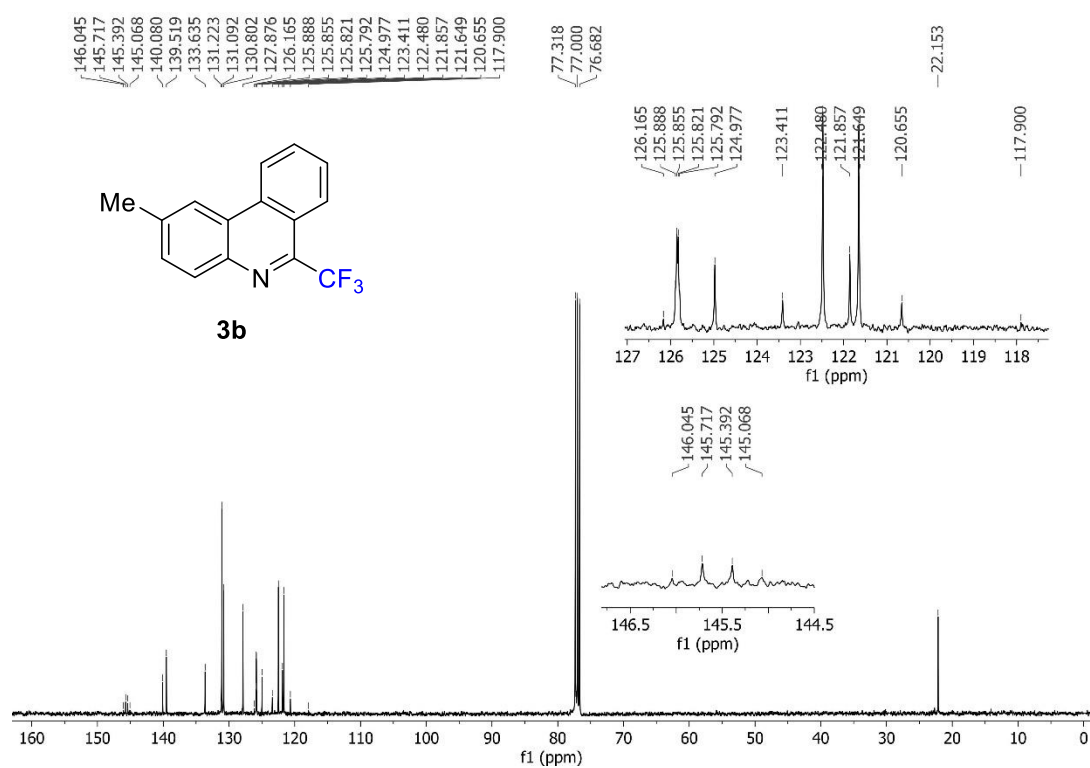

$^{19}\text{F}$  NMR spectrum of **3b** (376 MHz,  $\text{CDCl}_3$ )

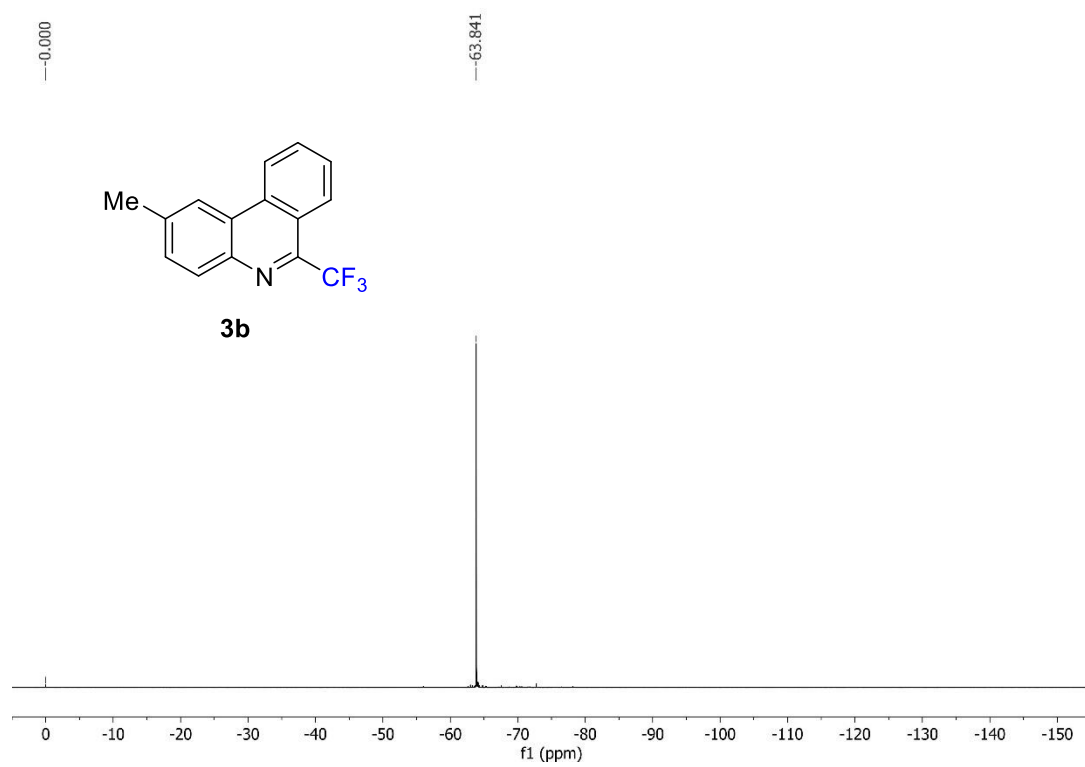

<sup>1</sup>H NMR spectrum of **3c** (400 MHz, CDCl<sub>3</sub>)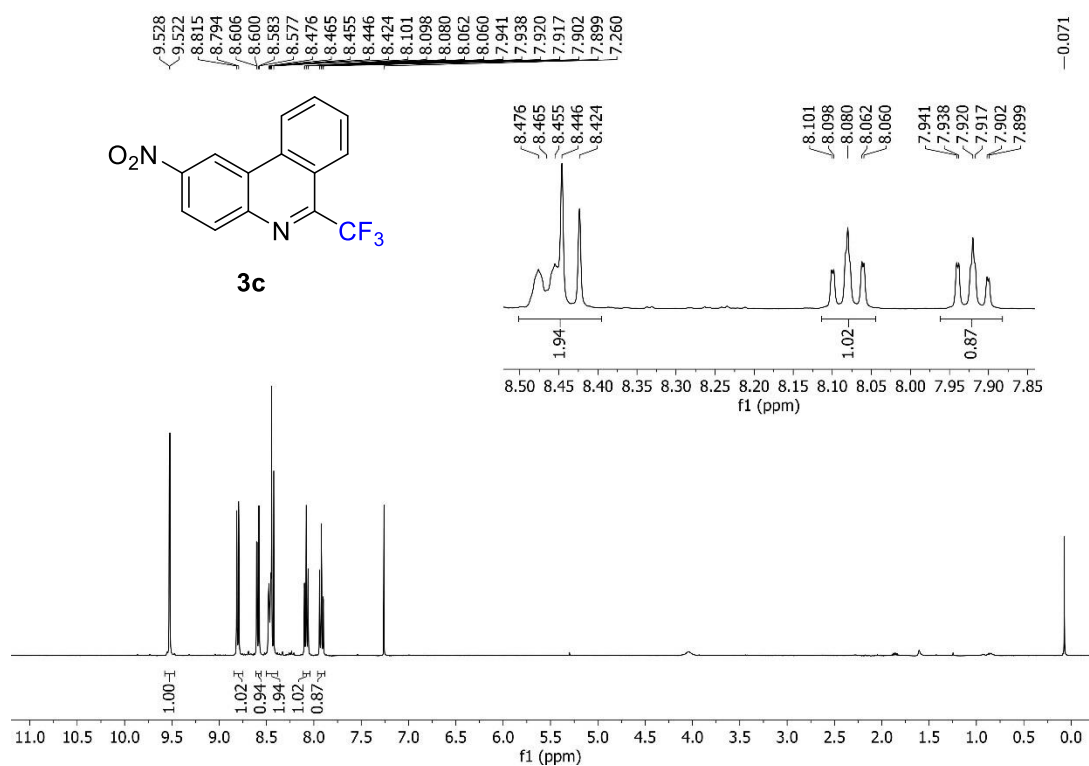<sup>13</sup>C NMR spectrum of **3c** (100 MHz, CDCl<sub>3</sub>)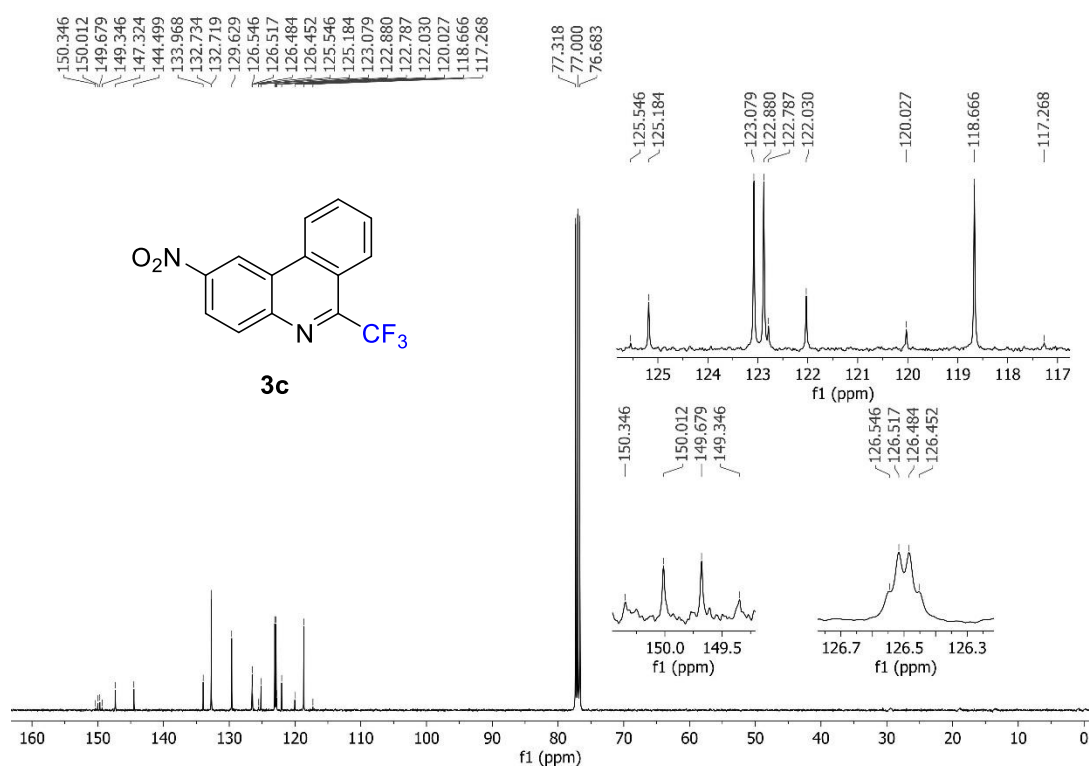



$^{19}\text{F}$  NMR spectrum of **3c** (376 MHz,  $\text{CDCl}_3$ )

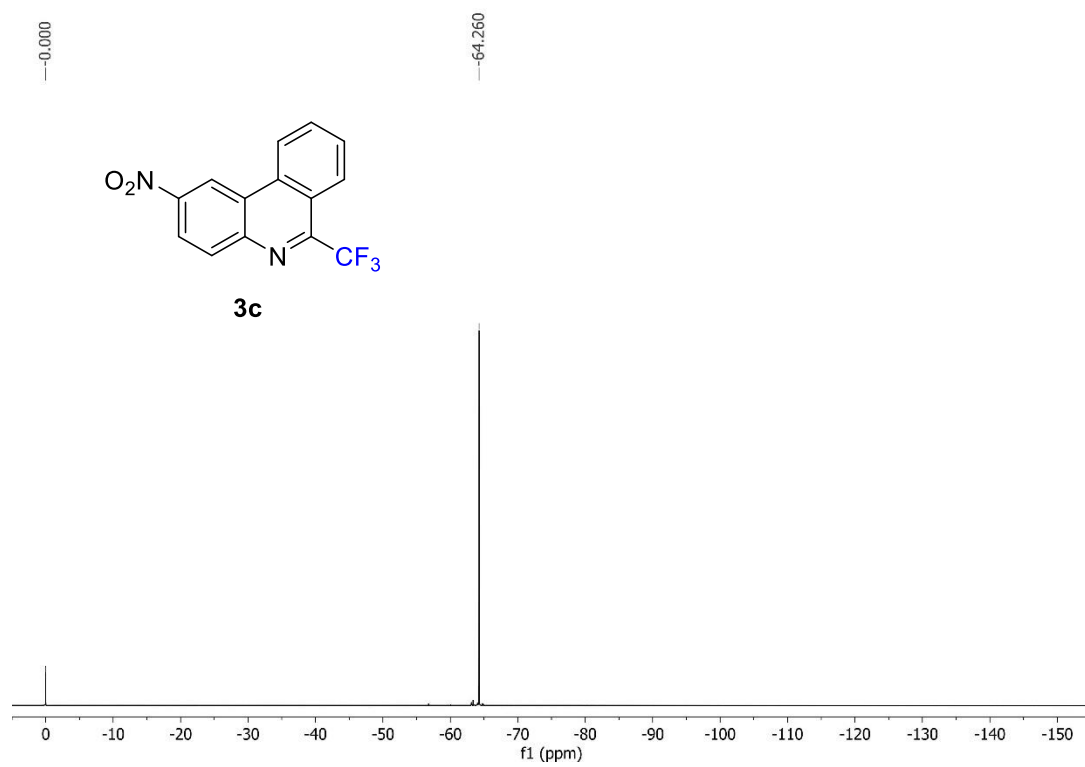

<sup>1</sup>H NMR spectrum of **3d** (400 MHz, CDCl<sub>3</sub>)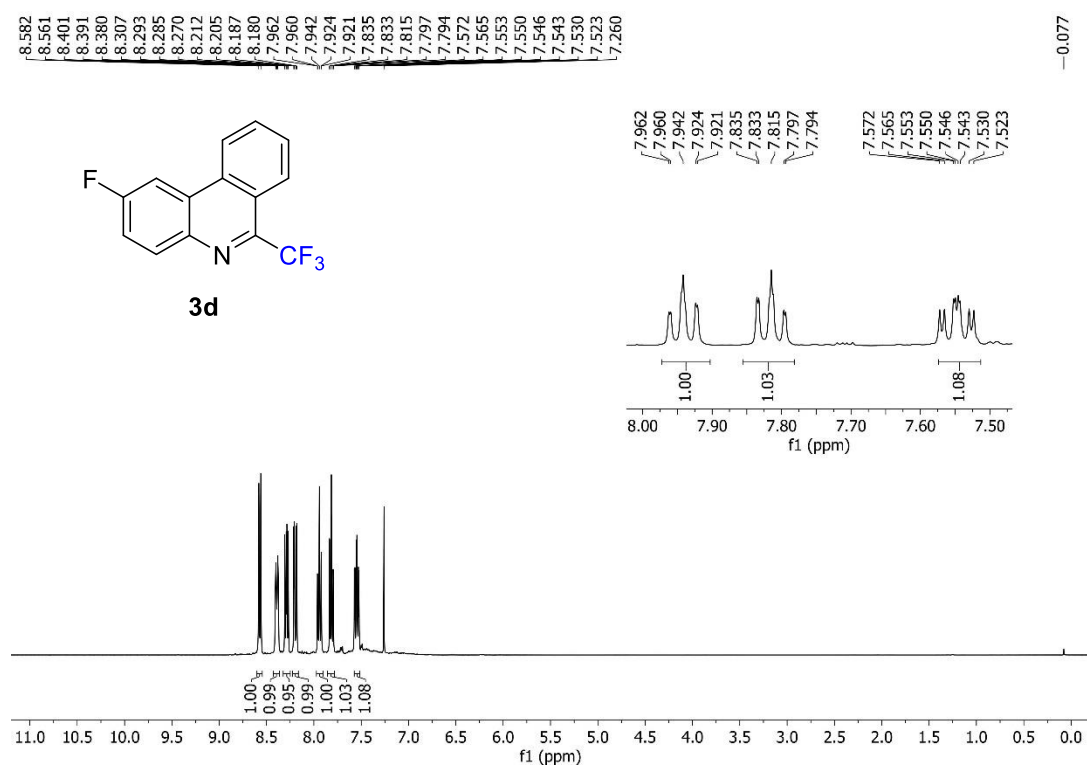<sup>13</sup>C NMR spectrum of **3d** (100 MHz, CDCl<sub>3</sub>)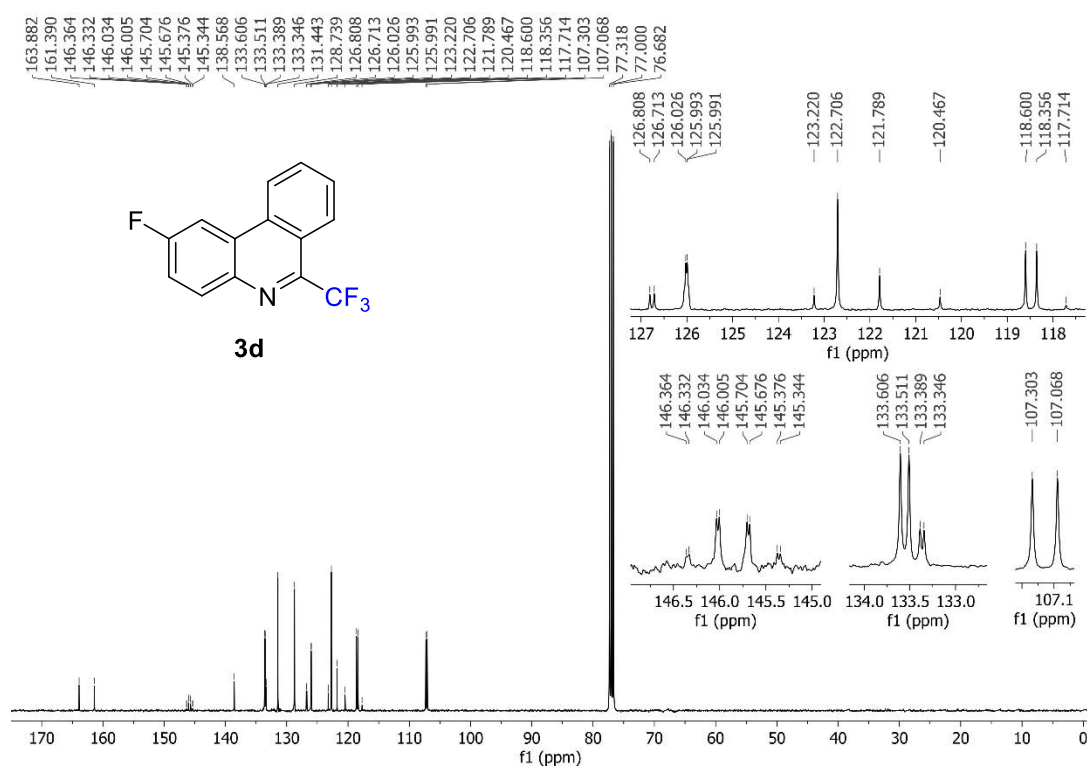

$^{19}\text{F}$  NMR spectrum of **3d** (376 MHz,  $\text{CDCl}_3$ )

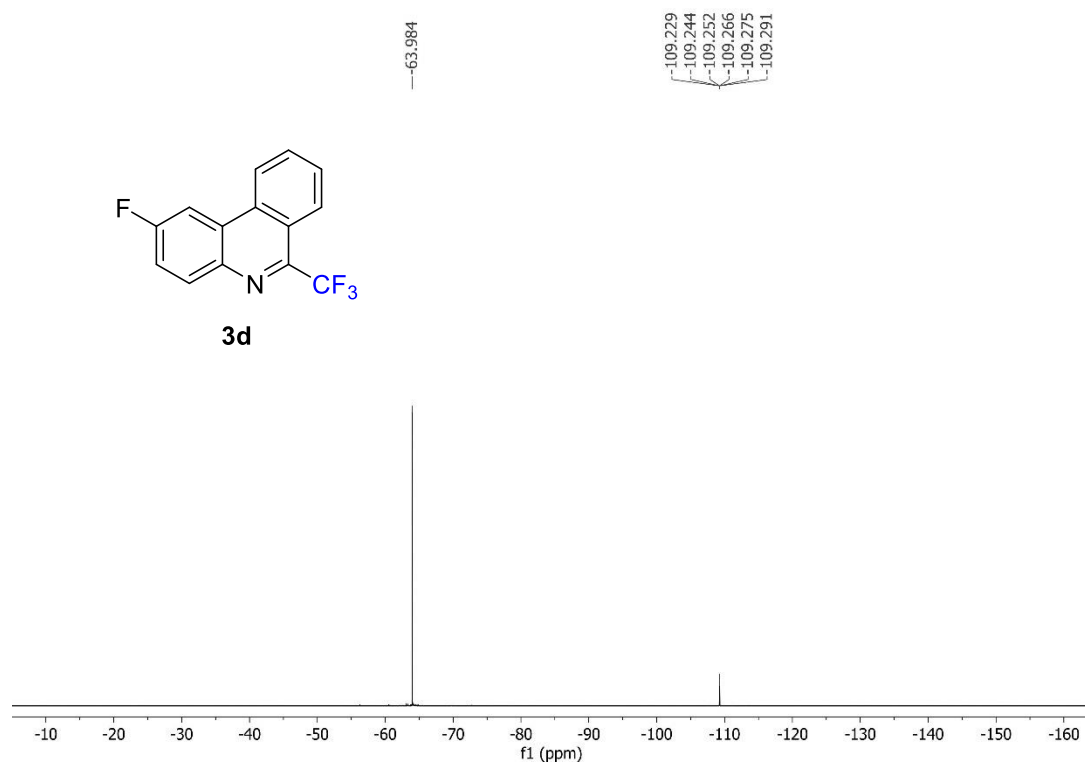

$^1\text{H}$  NMR spectrum of **3e** (400 MHz,  $\text{CDCl}_3$ )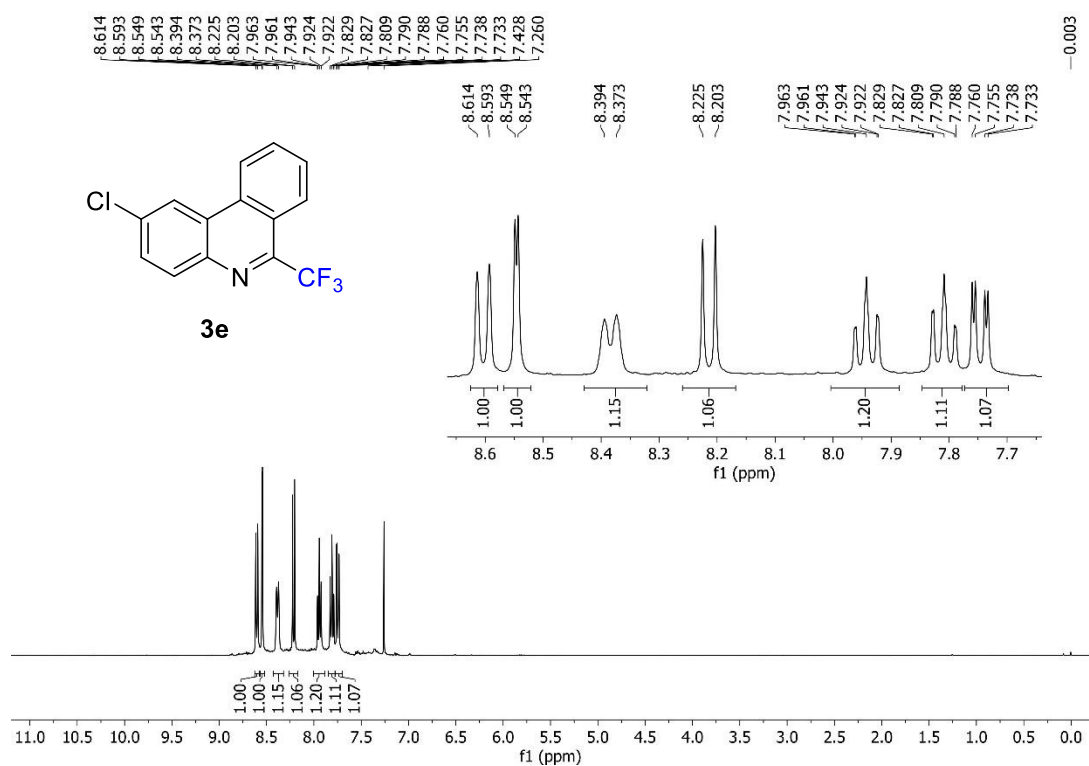 $^{13}\text{C}$  NMR spectrum of **3e** (100 MHz,  $\text{CDCl}_3$ )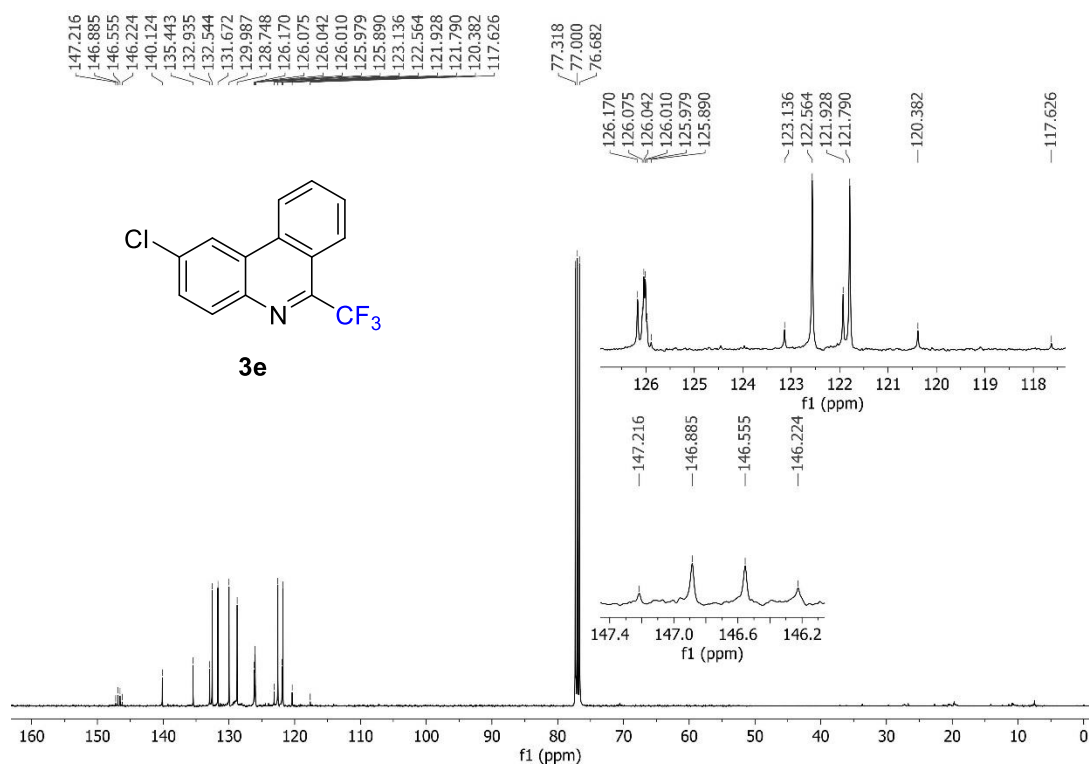

$^{19}\text{F}$  NMR spectrum of **3e** (376 MHz,  $\text{CDCl}_3$ )

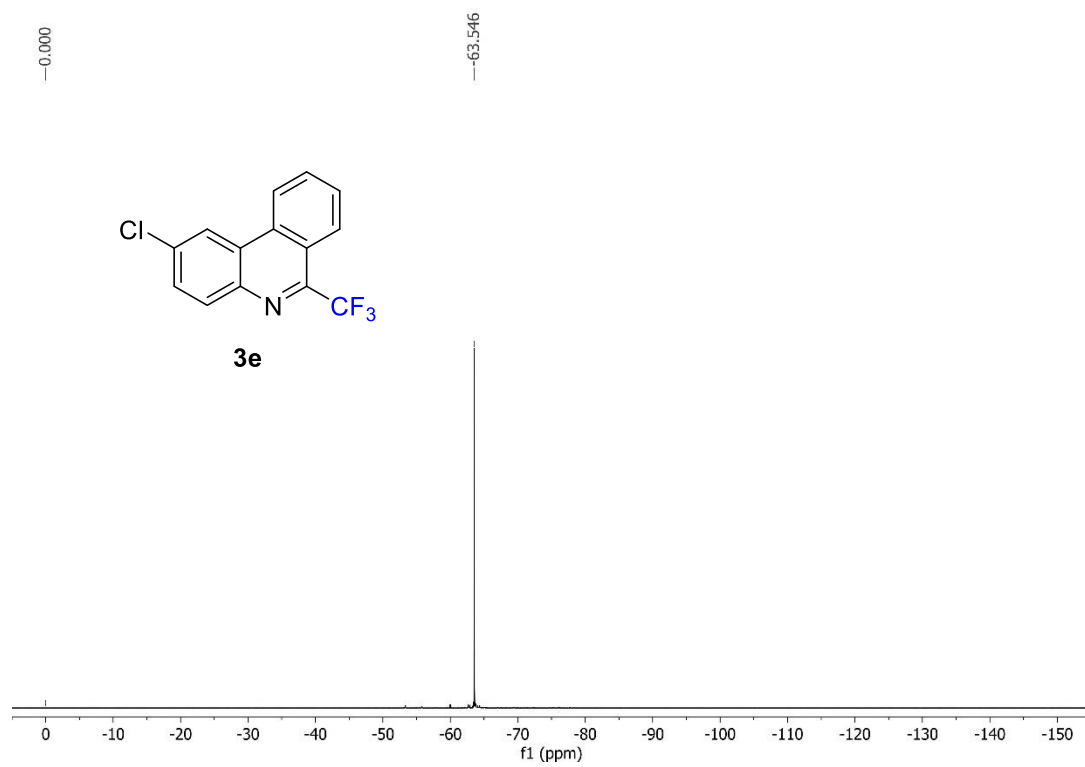

$^1\text{H}$  NMR spectrum of **3f** (400 MHz,  $\text{CDCl}_3$ )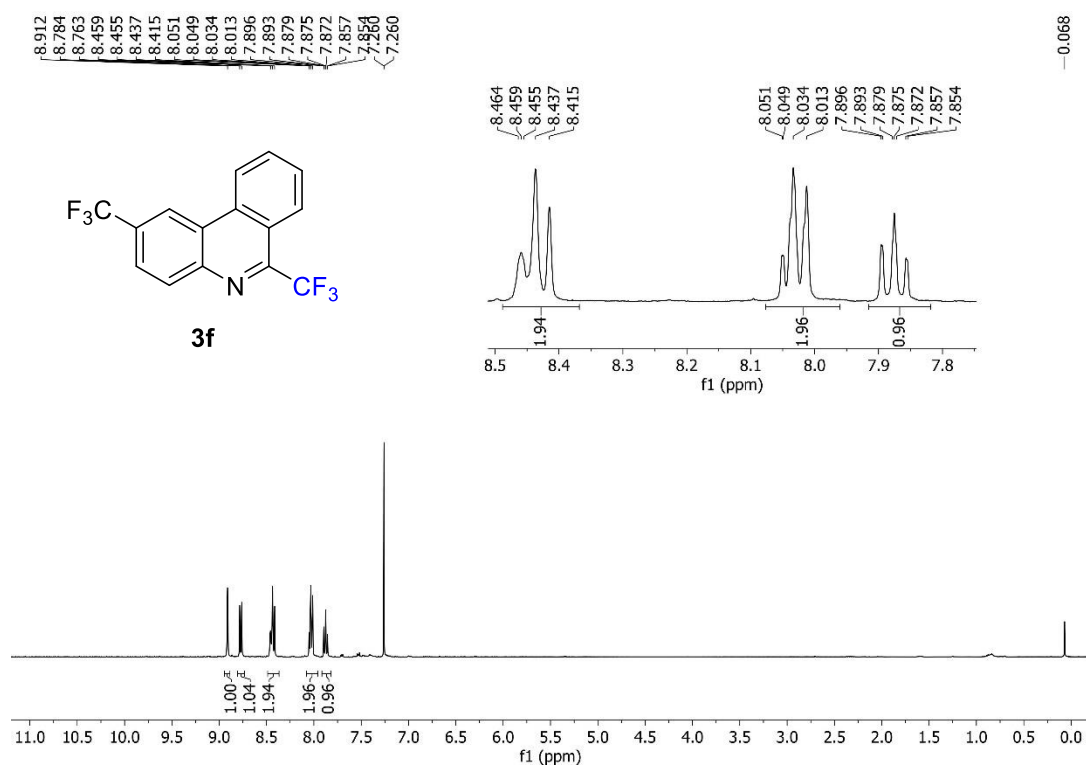 $^{13}\text{C}$  NMR spectrum of **3f** (125 MHz,  $\text{CDCl}_3$ )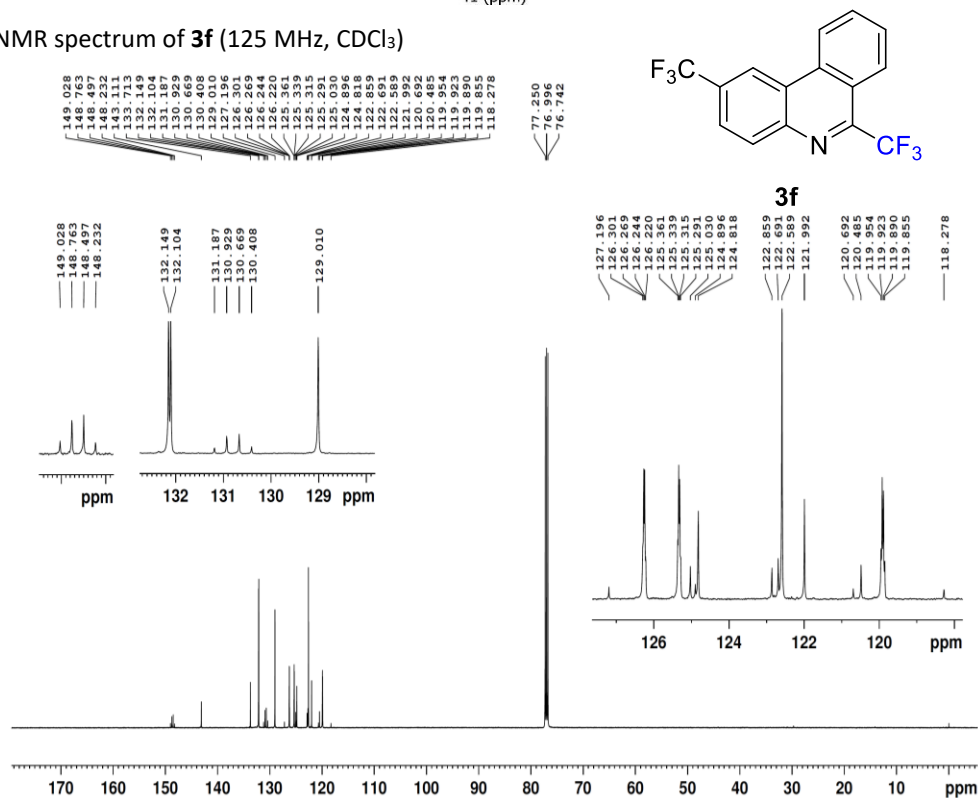

$^{19}\text{F}$  NMR spectrum of **3f** (376 MHz,  $\text{CDCl}_3$ )

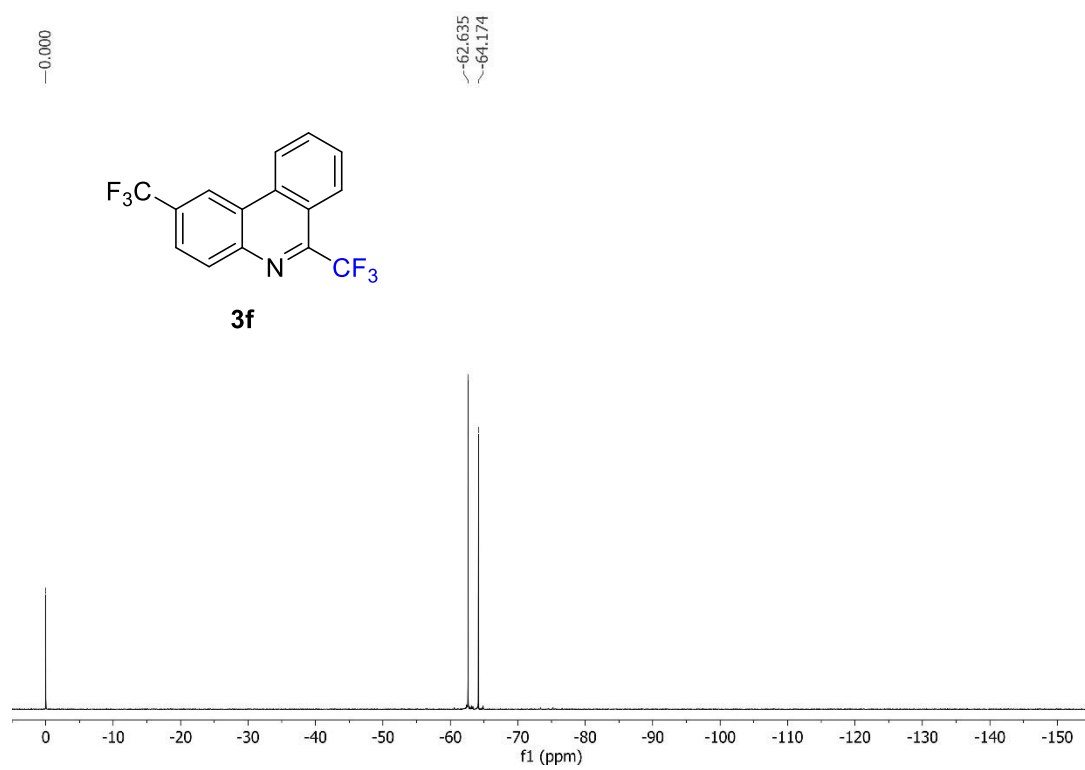

$^1\text{H}$  NMR spectrum of **3g** (400 MHz,  $\text{CDCl}_3$ )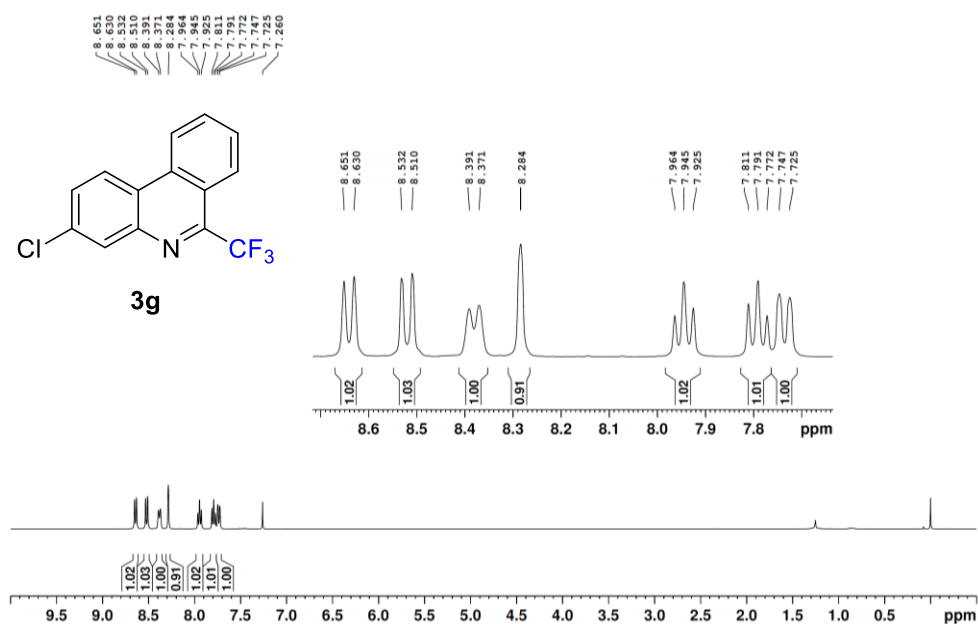 $^{13}\text{C}$  NMR spectrum of **3g** (100 MHz,  $\text{CDCl}_3$ )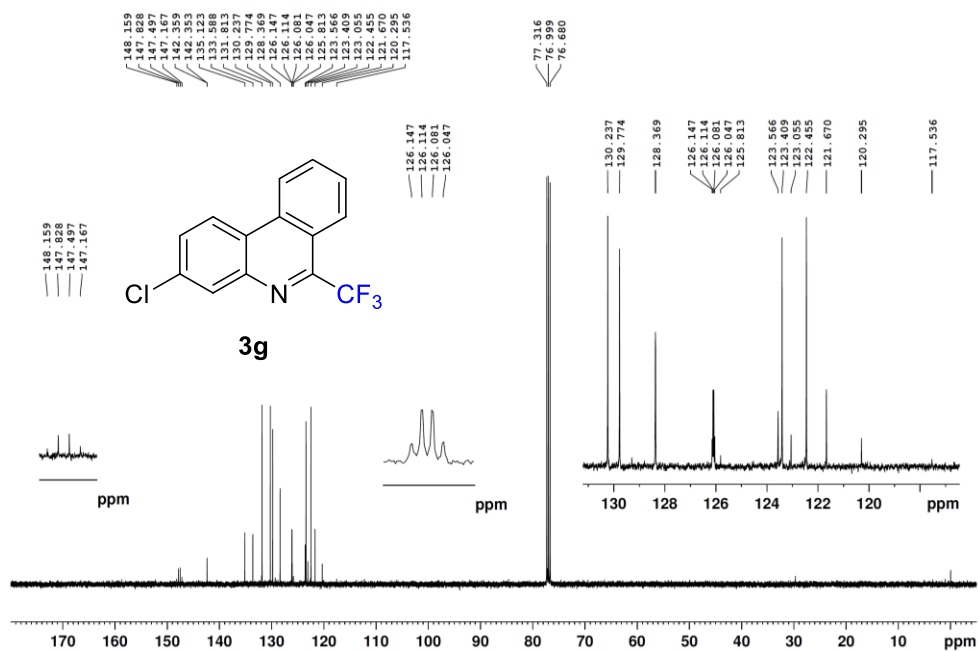



$^{19}\text{F}$  NMR spectrum of **3g** (376 MHz,  $\text{CDCl}_3$ )

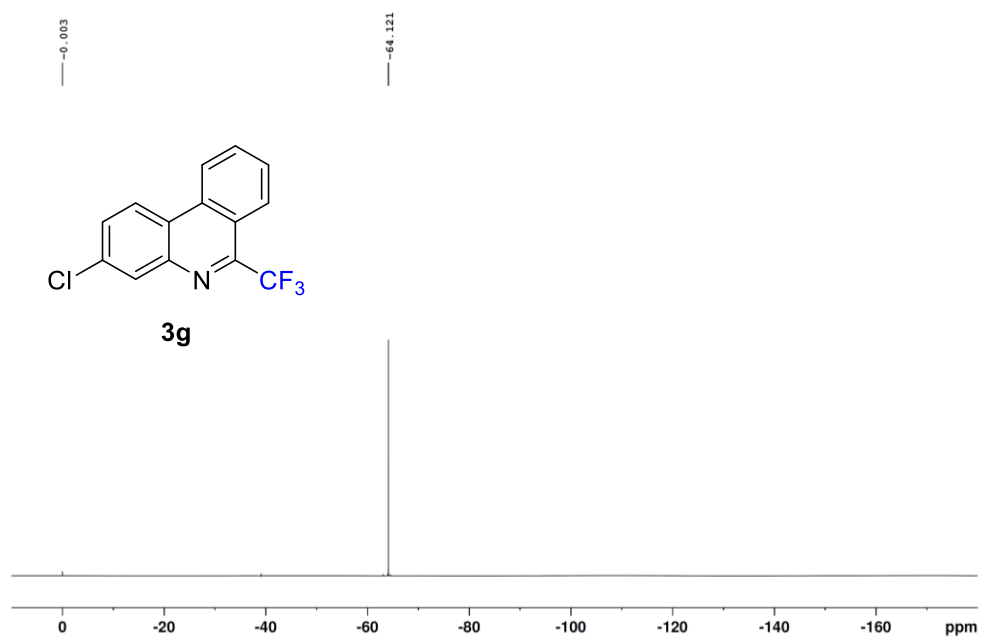

<sup>1</sup>H NMR spectrum of **3h** (400 MHz, CDCl<sub>3</sub>)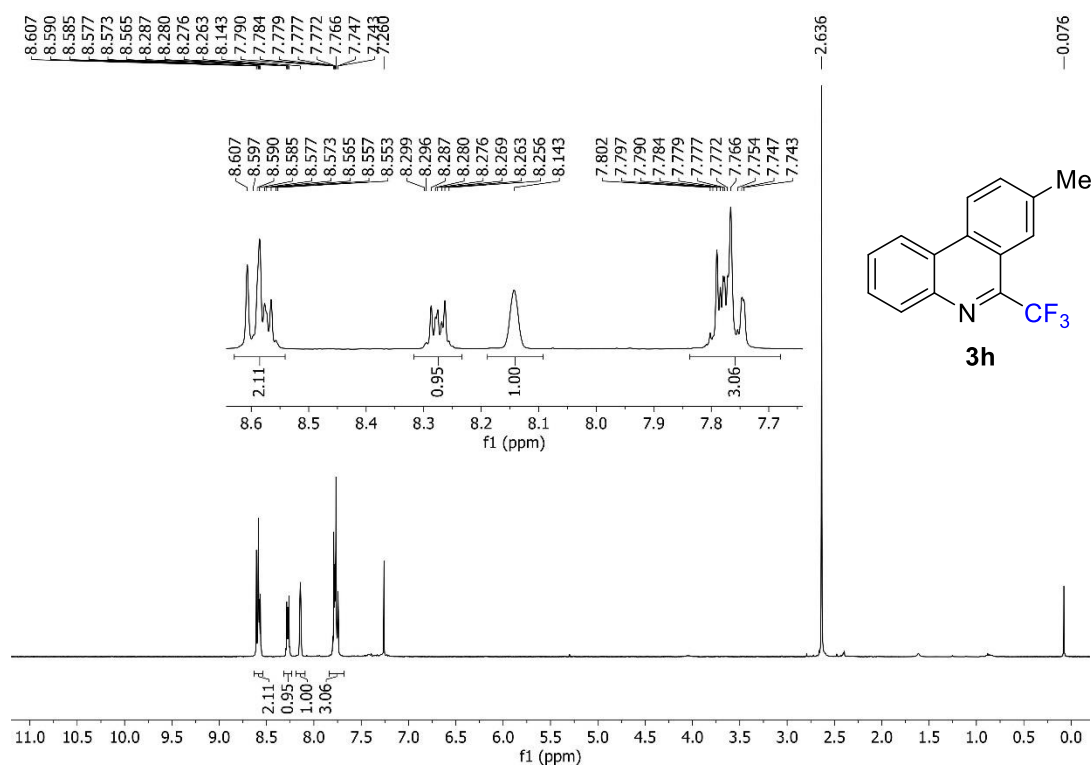<sup>13</sup>C NMR spectrum of **3h** (100 MHz, CDCl<sub>3</sub>)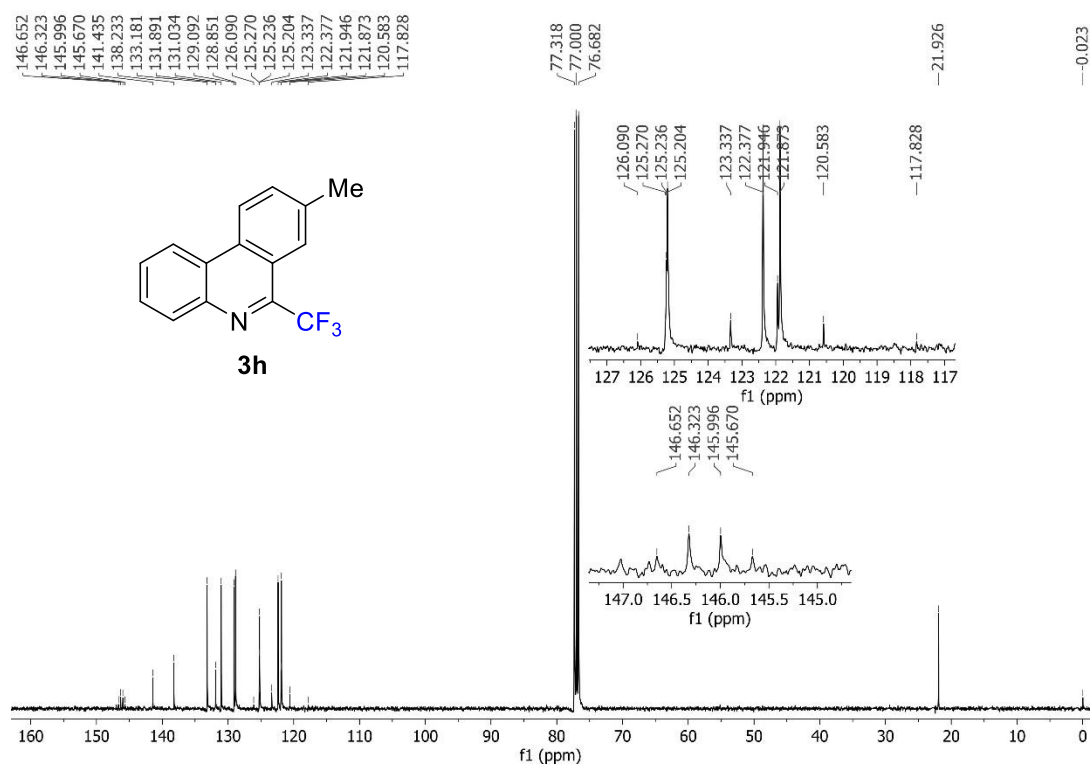

$^{19}\text{F}$  NMR spectrum of **3h** (376 MHz,  $\text{CDCl}_3$ )

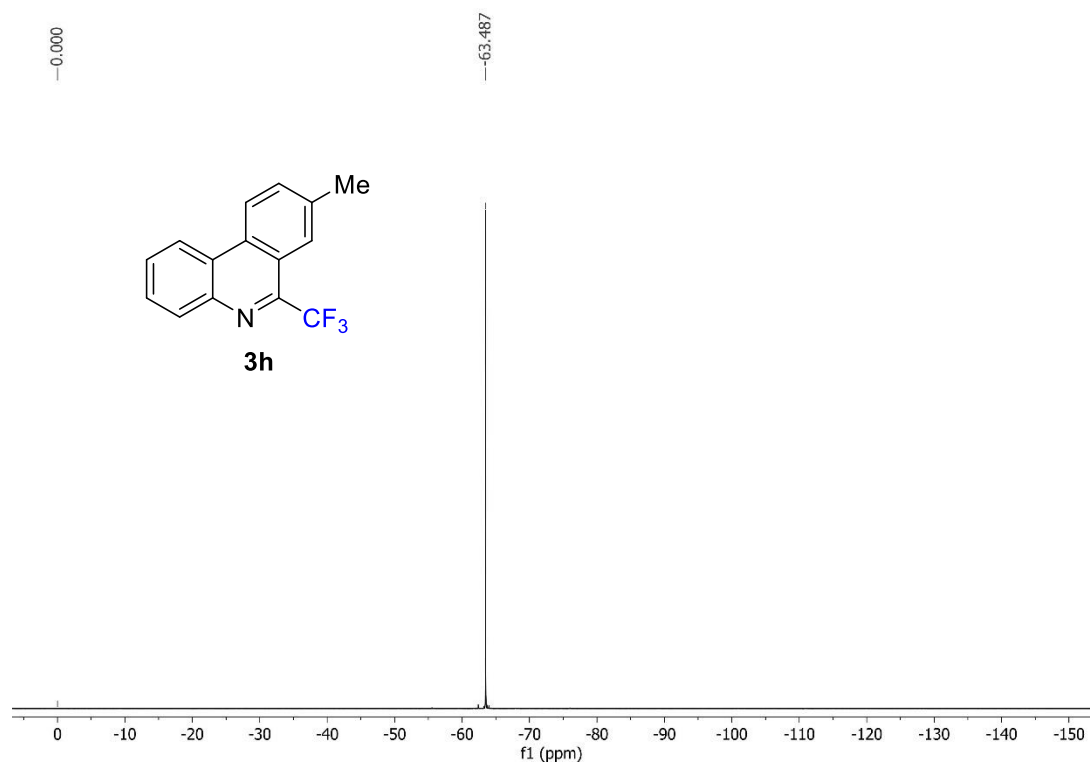

<sup>1</sup>H NMR spectrum of **3i** (400 MHz, CDCl<sub>3</sub>)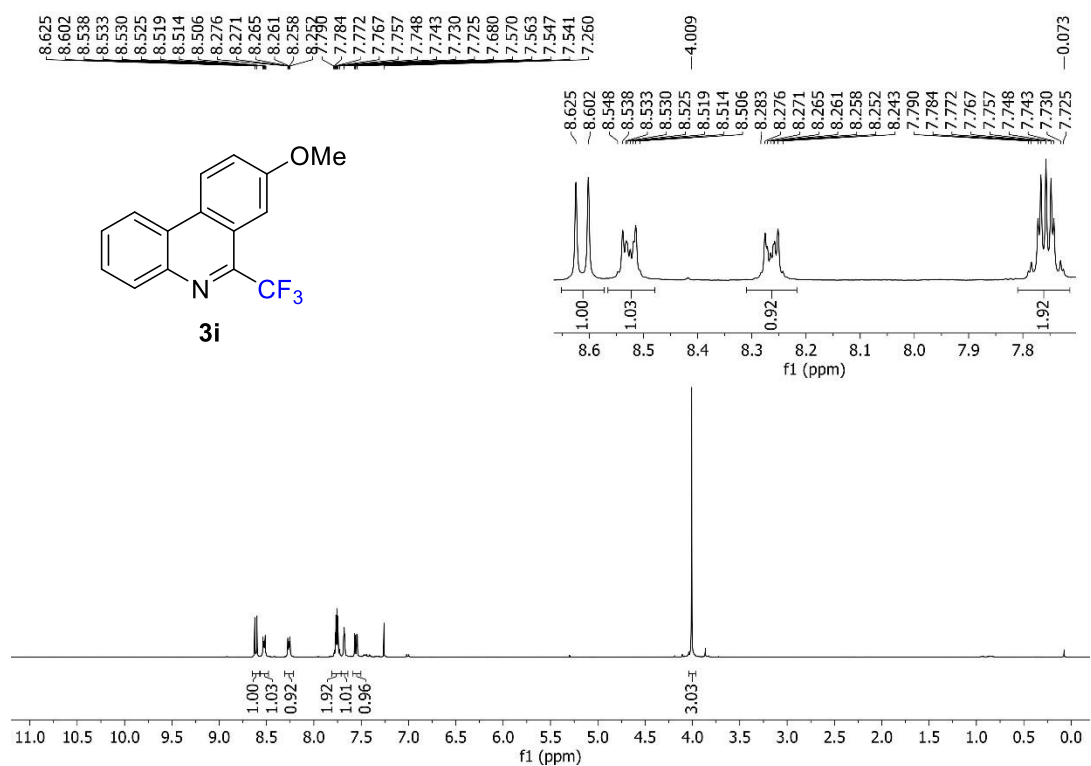<sup>13</sup>C NMR spectrum of **3i** (100 MHz, CDCl<sub>3</sub>)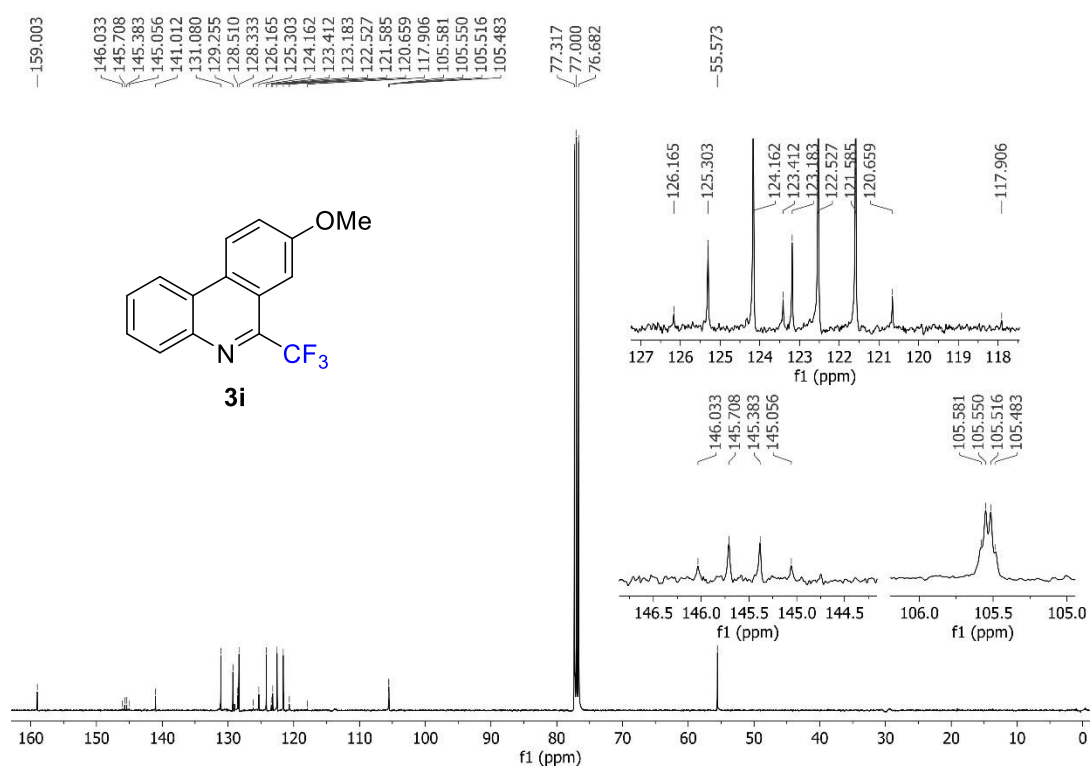

$^{19}\text{F}$  NMR spectrum of **3i** (376 MHz,  $\text{CDCl}_3$ )

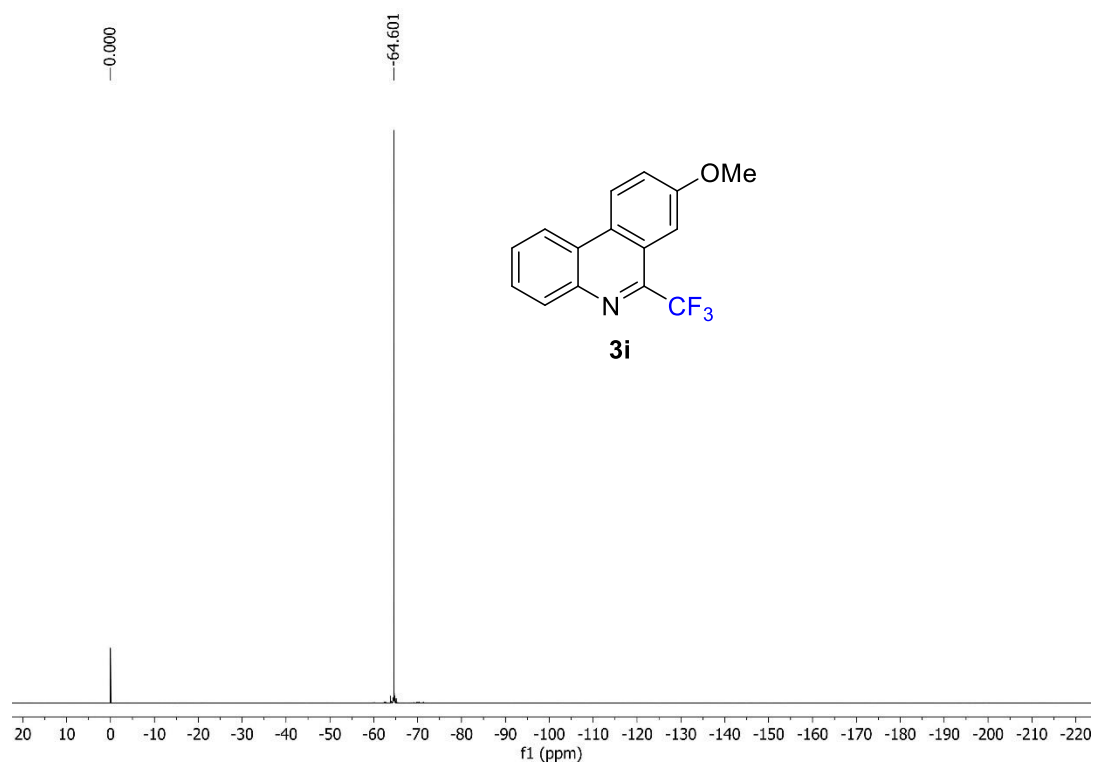

<sup>1</sup>H NMR spectrum of **3j** (400 MHz, CDCl<sub>3</sub>)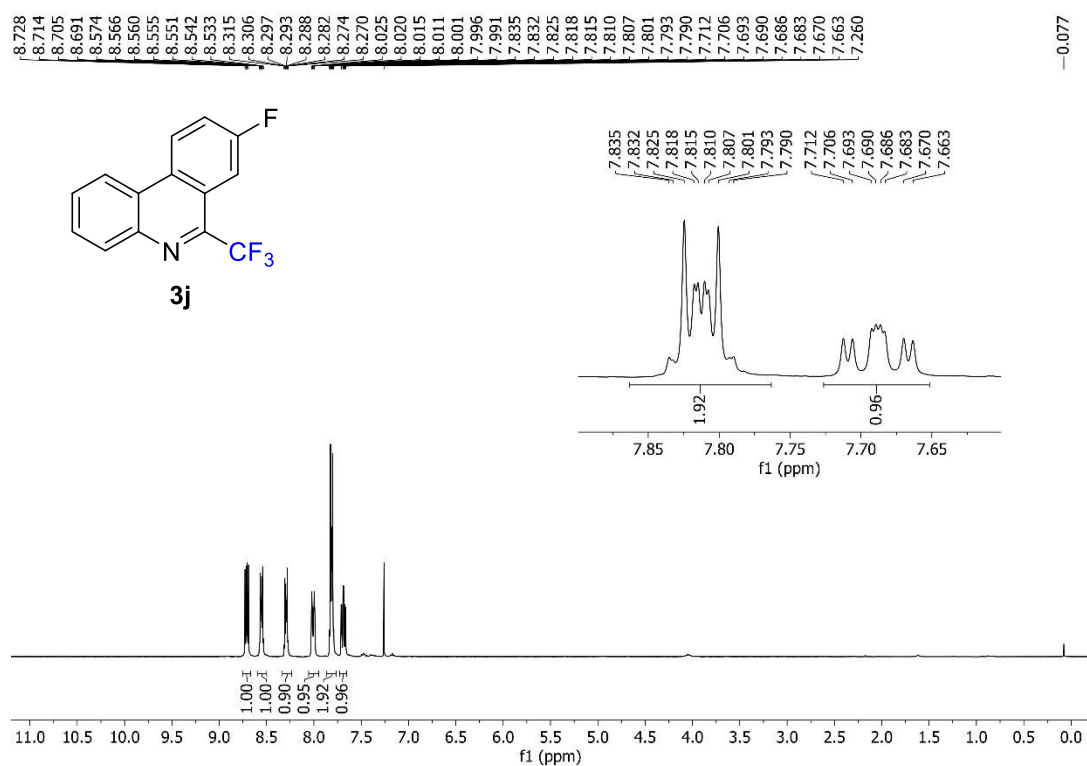<sup>13</sup>C NMR spectrum of **3j** (100 MHz, CDCl<sub>3</sub>)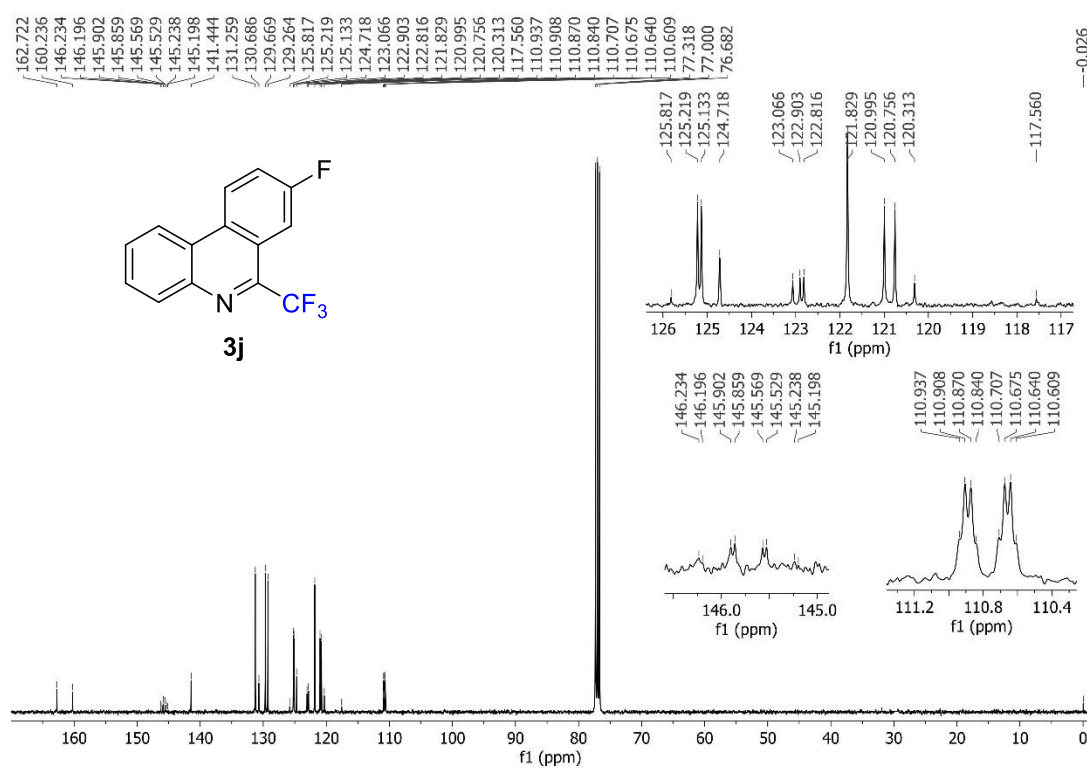

$^{19}\text{F}$  NMR spectrum of **3j** (376 MHz,  $\text{CDCl}_3$ )

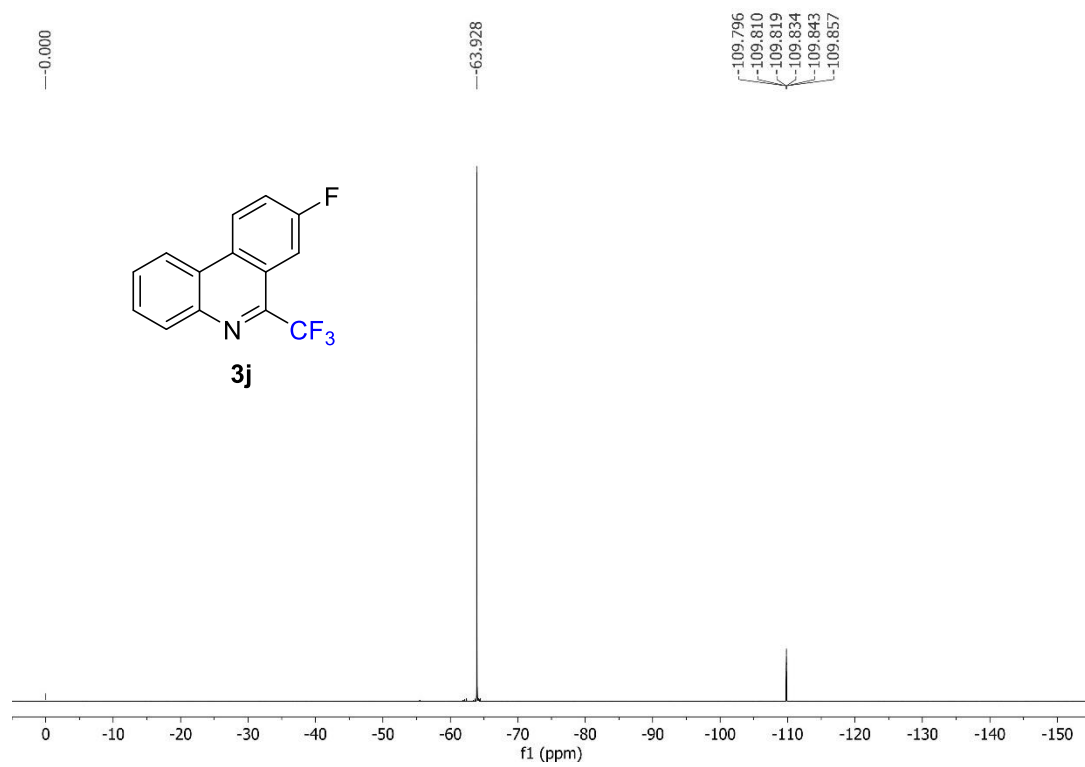

<sup>1</sup>H NMR spectrum of **3k** (400 MHz, CDCl<sub>3</sub>)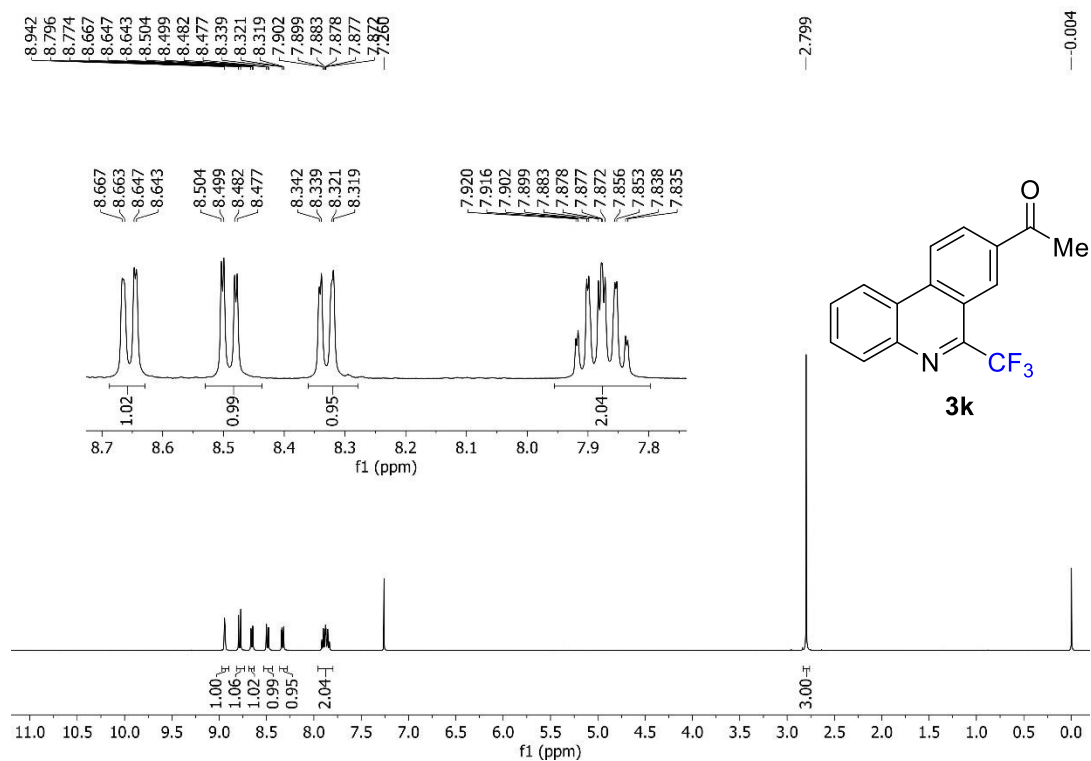<sup>13</sup>C NMR spectrum of **3k** (100 MHz, CDCl<sub>3</sub>)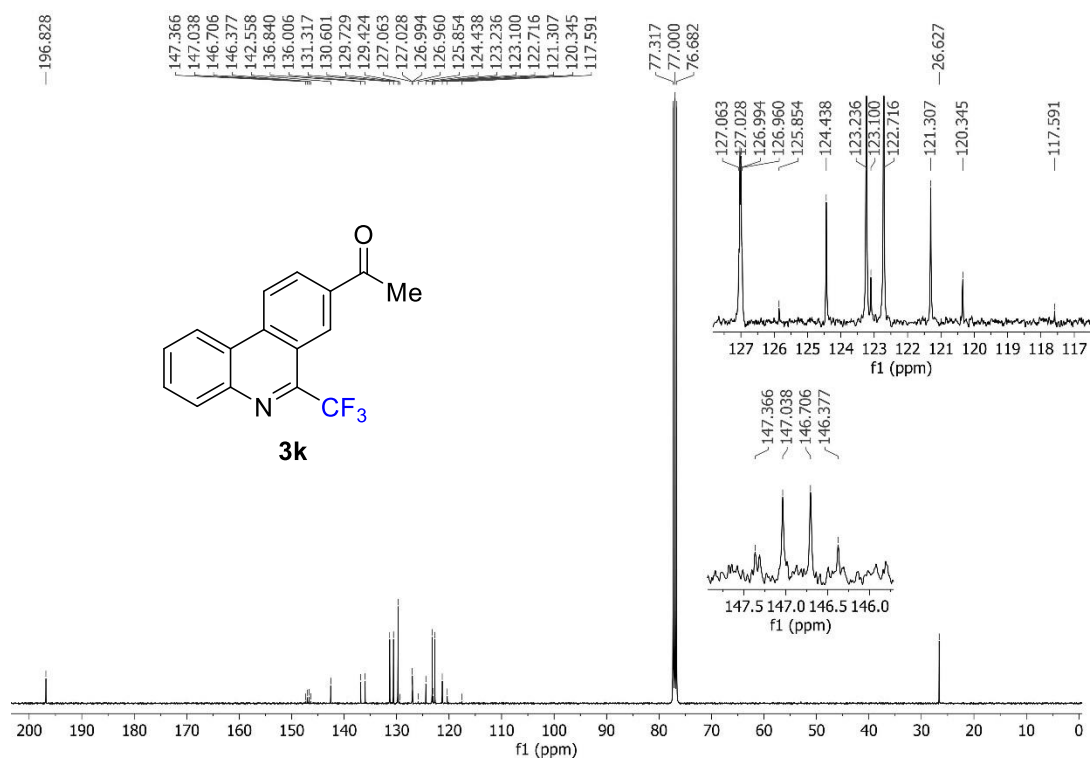



$^{19}\text{F}$  NMR spectrum of **3k** (376 MHz,  $\text{CDCl}_3$ )

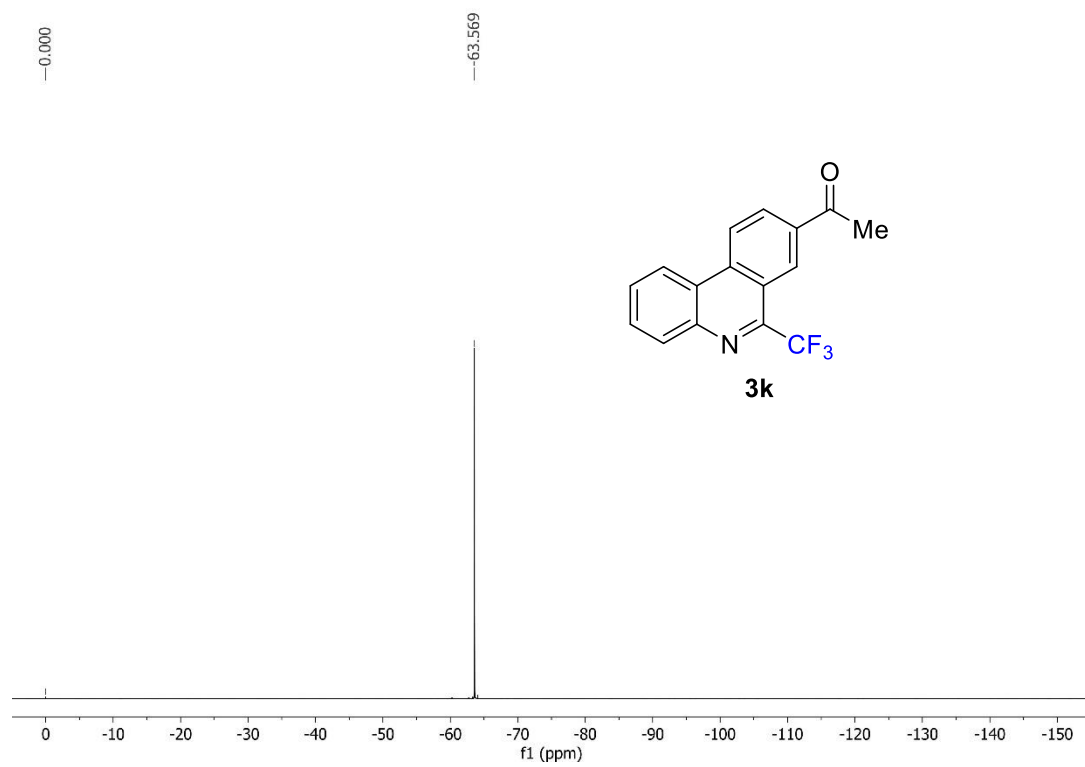

<sup>1</sup>H NMR spectrum of **3I** (400 MHz, CDCl<sub>3</sub>)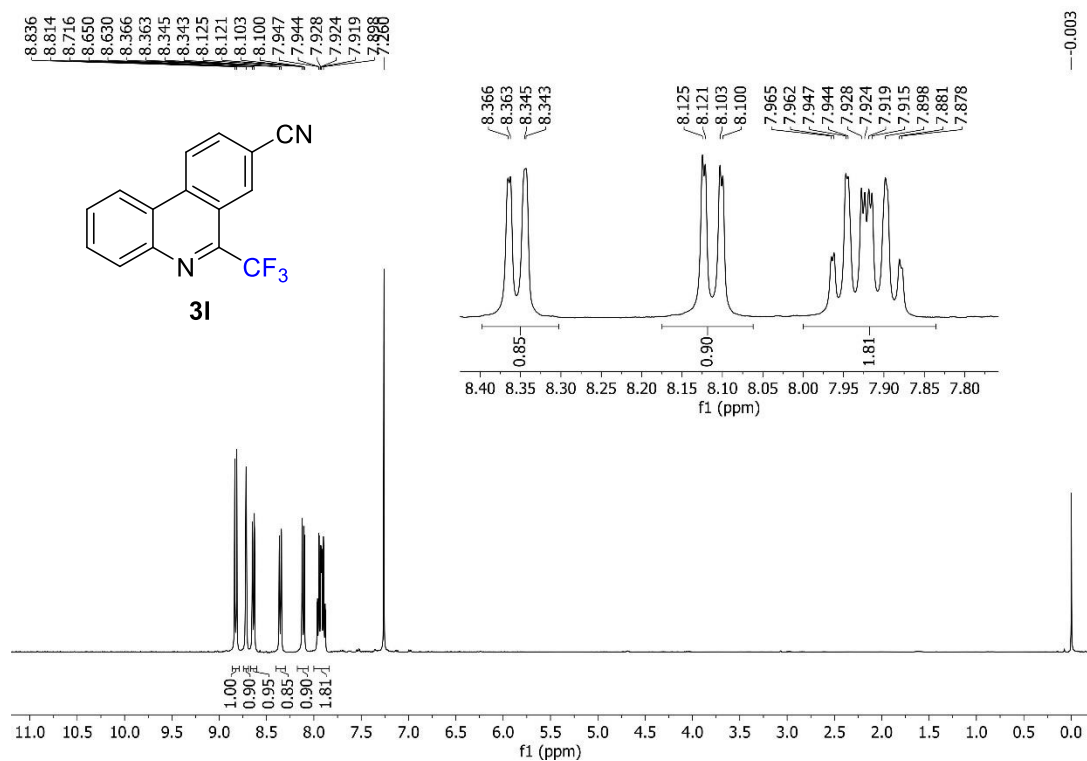<sup>13</sup>C NMR spectrum of **3I** (100 MHz, CDCl<sub>3</sub>)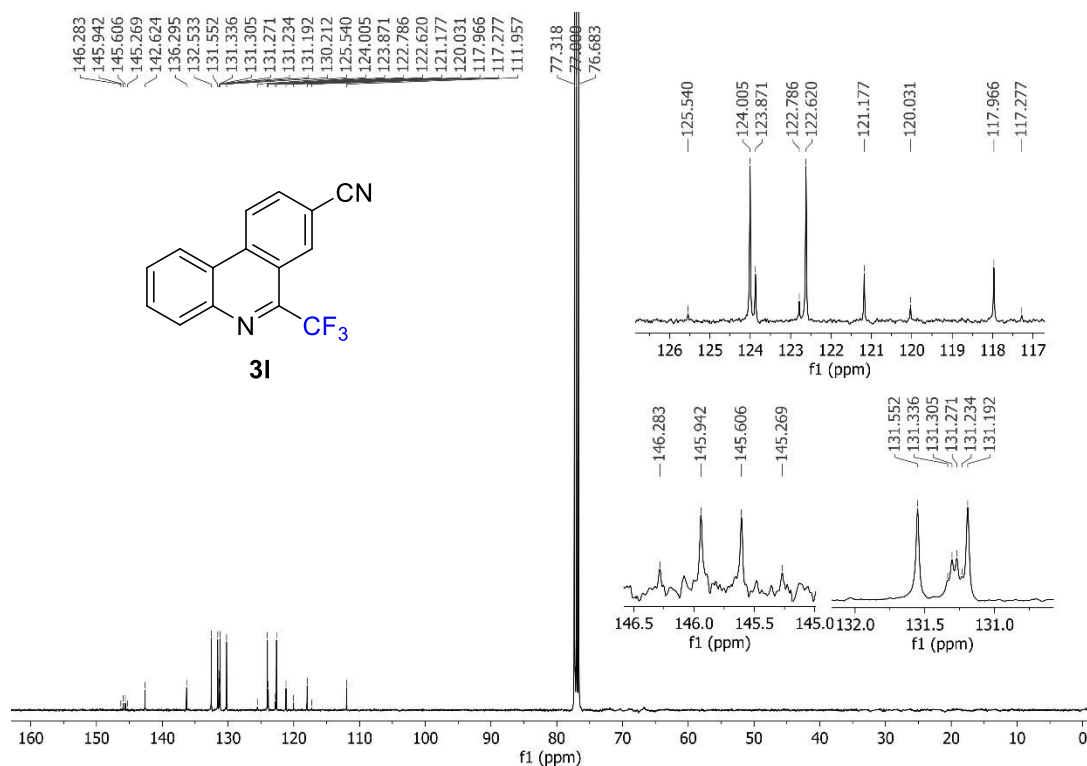

$^{19}\text{F}$  NMR spectrum of **3I** (376 MHz,  $\text{CDCl}_3$ )

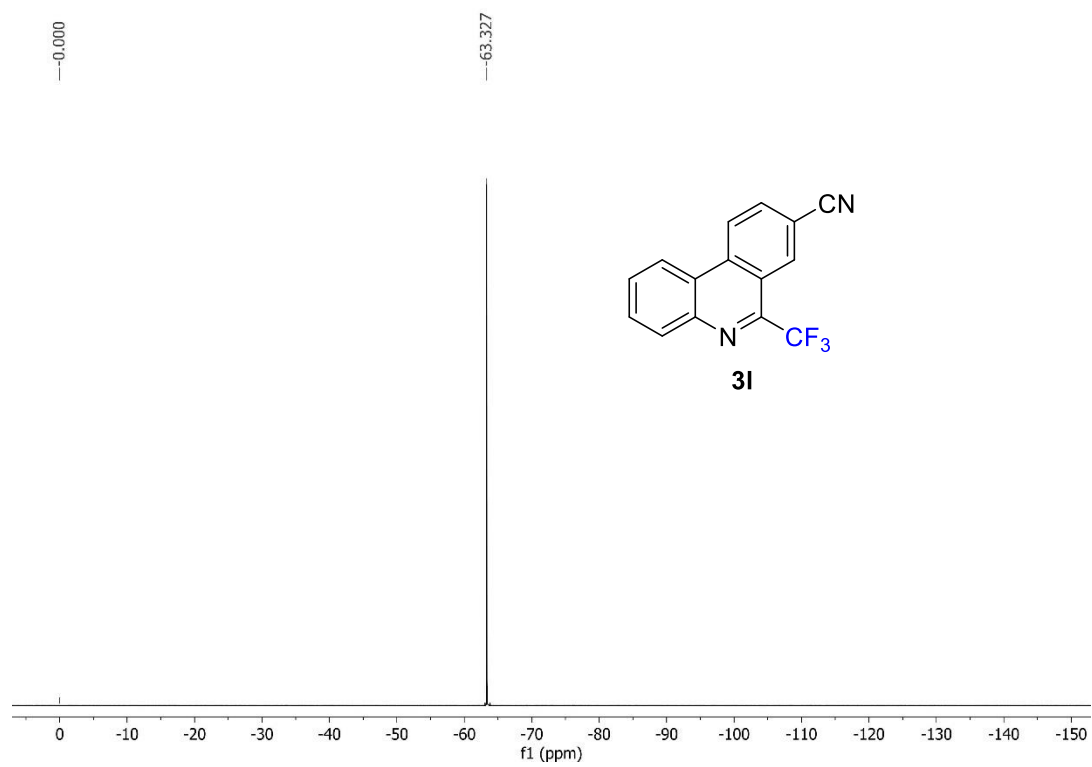

<sup>1</sup>H NMR spectrum of **3m** (400 MHz, CDCl<sub>3</sub>)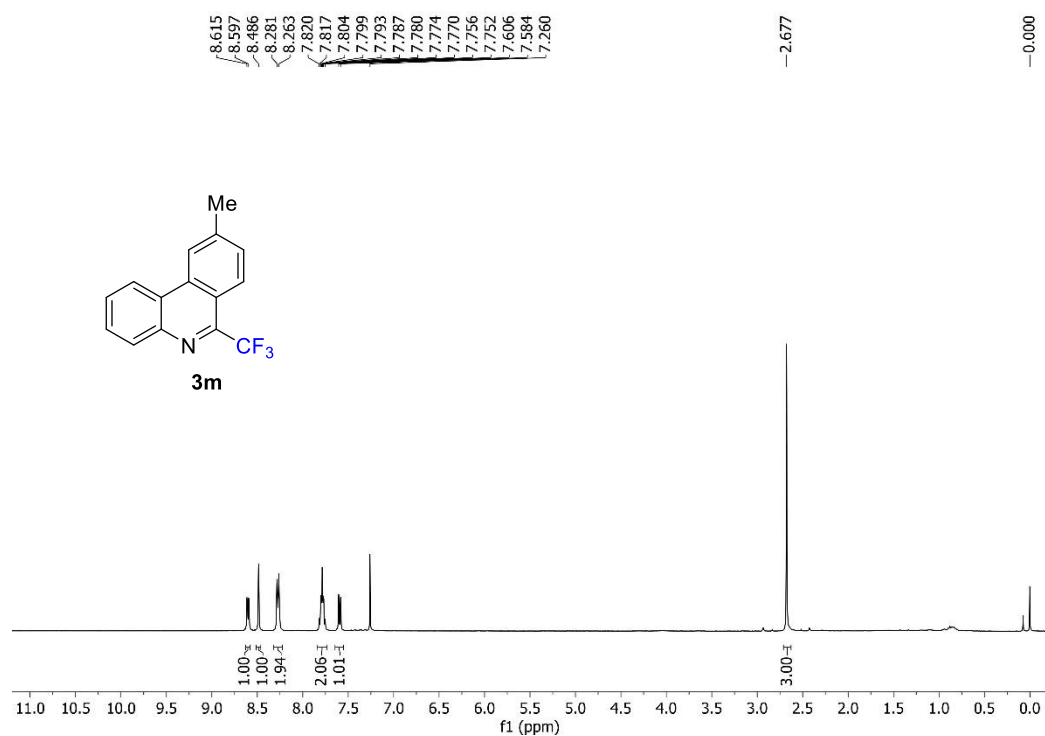<sup>13</sup>C NMR spectrum of **3m** (100 MHz, CDCl<sub>3</sub>)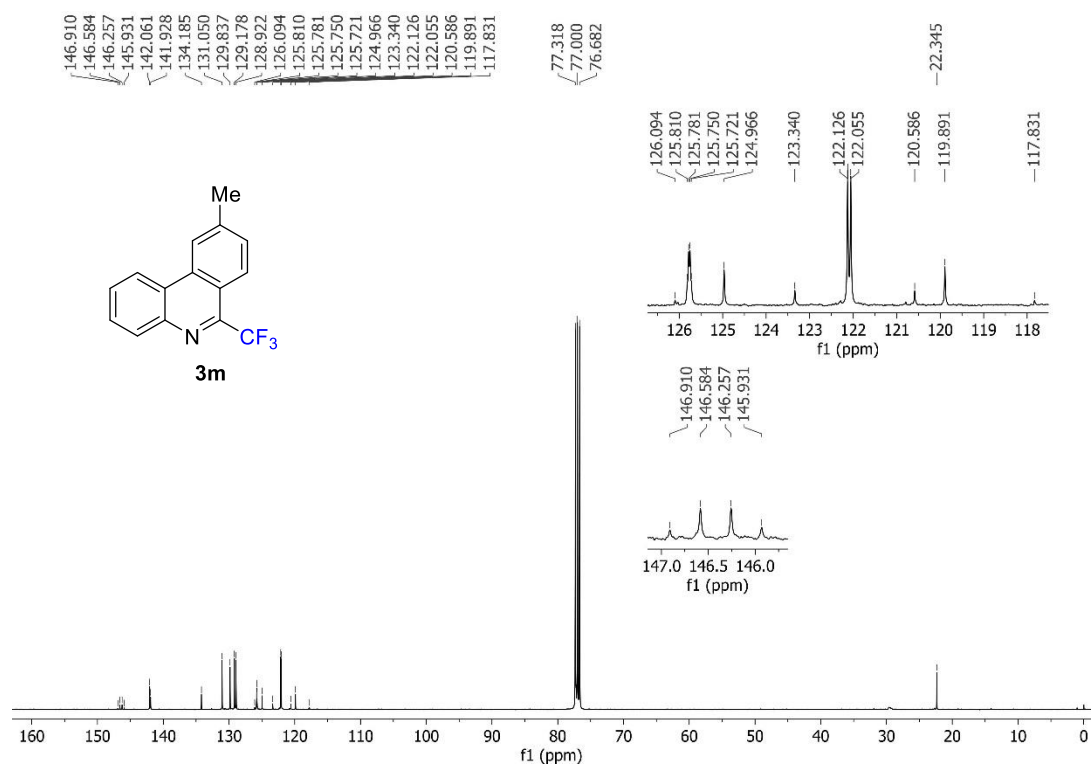

$^{19}\text{F}$  NMR spectrum of **3m** (376 MHz,  $\text{CDCl}_3$ )

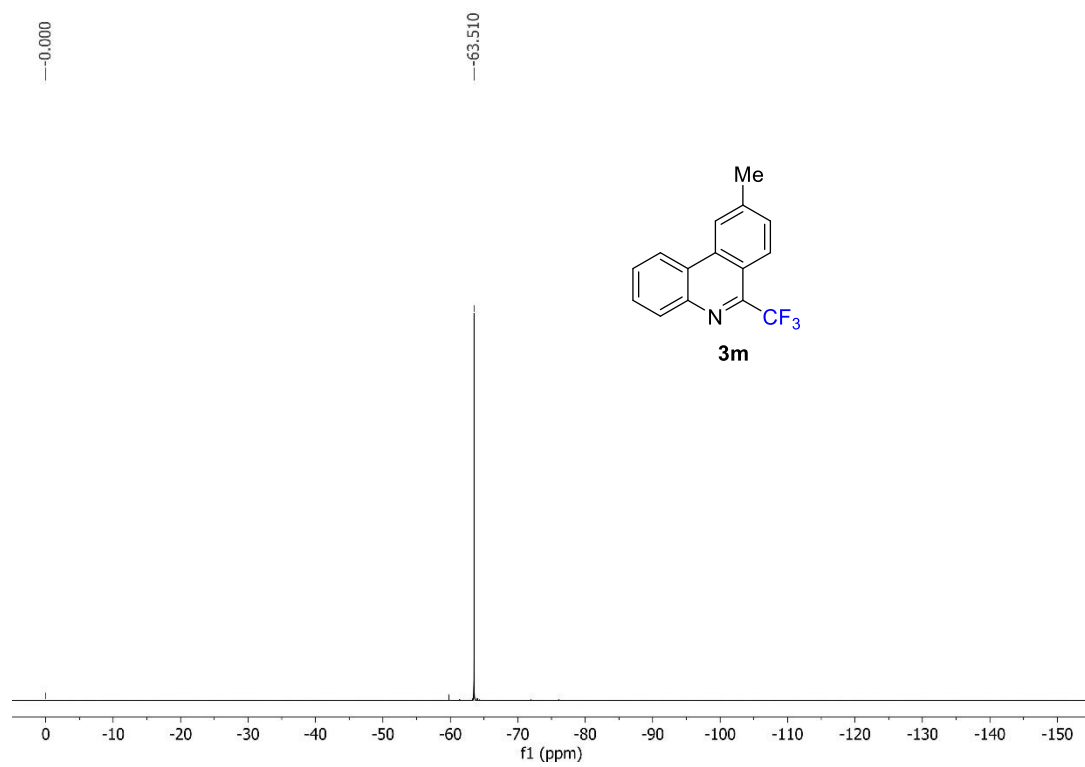

<sup>1</sup>H NMR spectrum of **3m'** (400 MHz, CDCl<sub>3</sub>)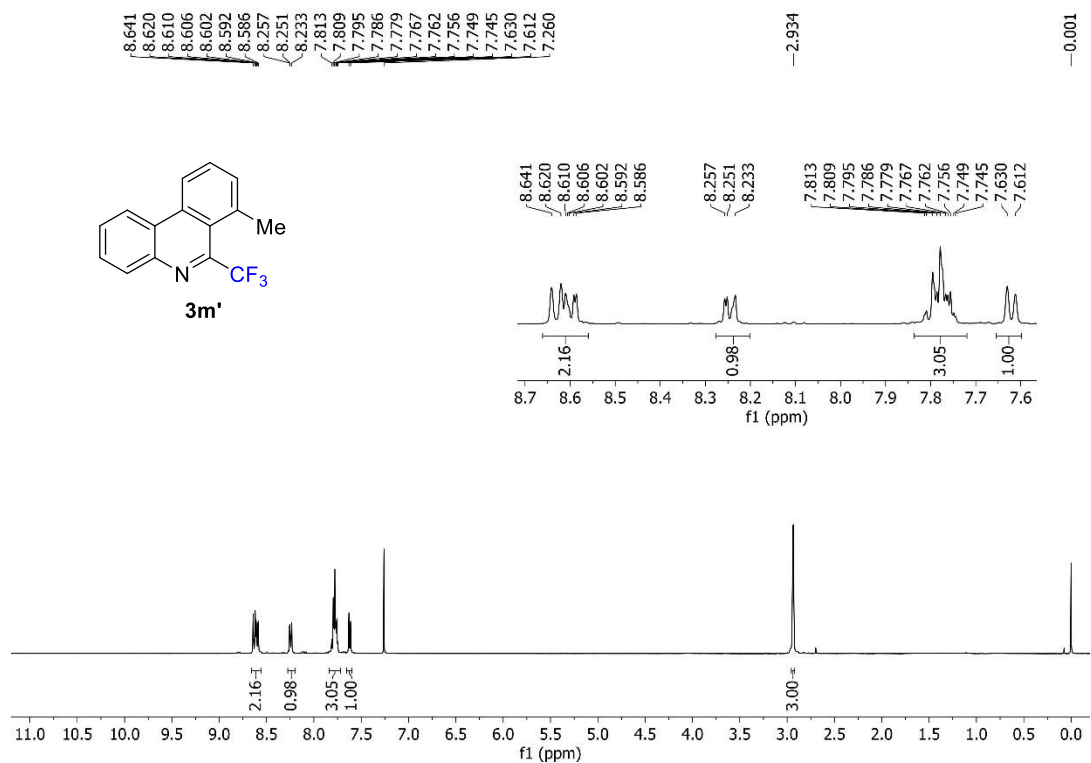<sup>13</sup>C NMR spectrum of **3m'** (100 MHz, CDCl<sub>3</sub>)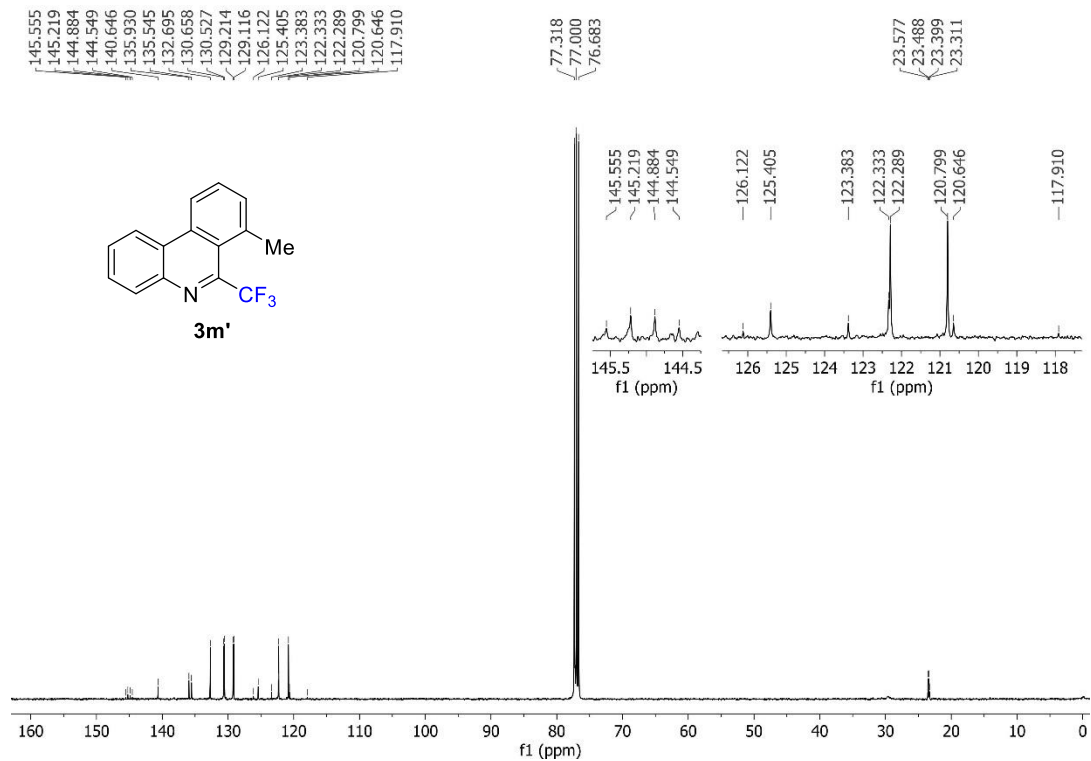

$^{19}\text{F}$  NMR spectrum of **3m'** (376 MHz,  $\text{CDCl}_3$ )

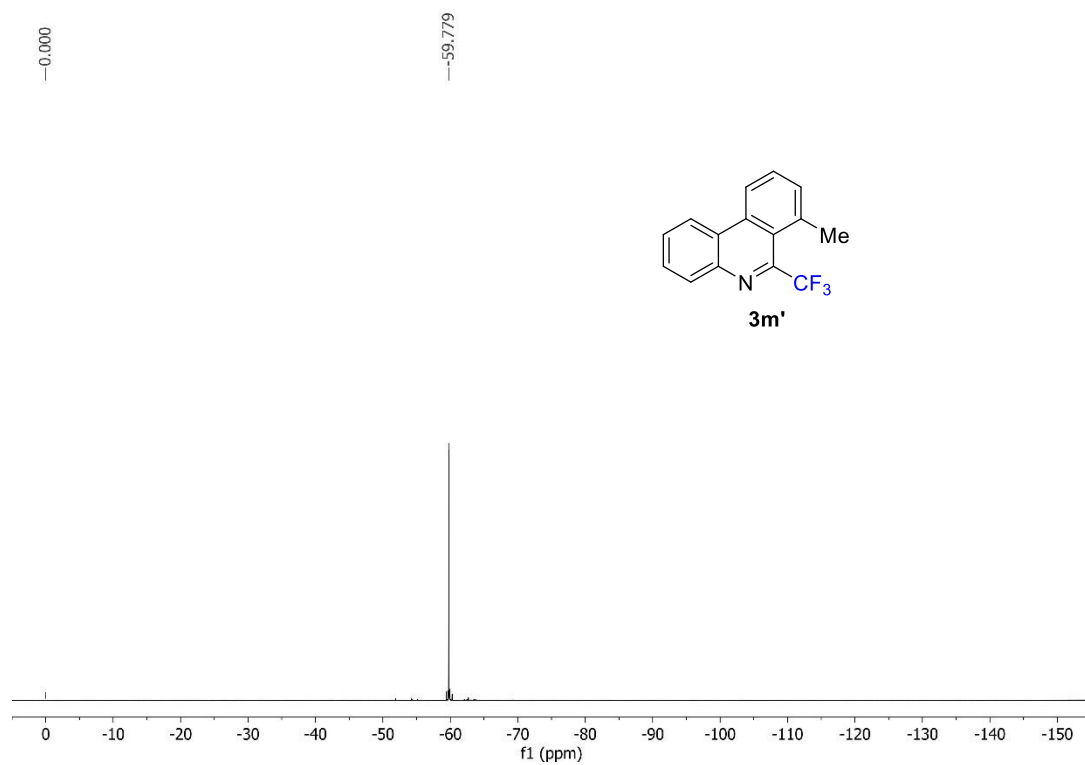

<sup>1</sup>H NMR spectrum of **3n** (500 MHz, CDCl<sub>3</sub>)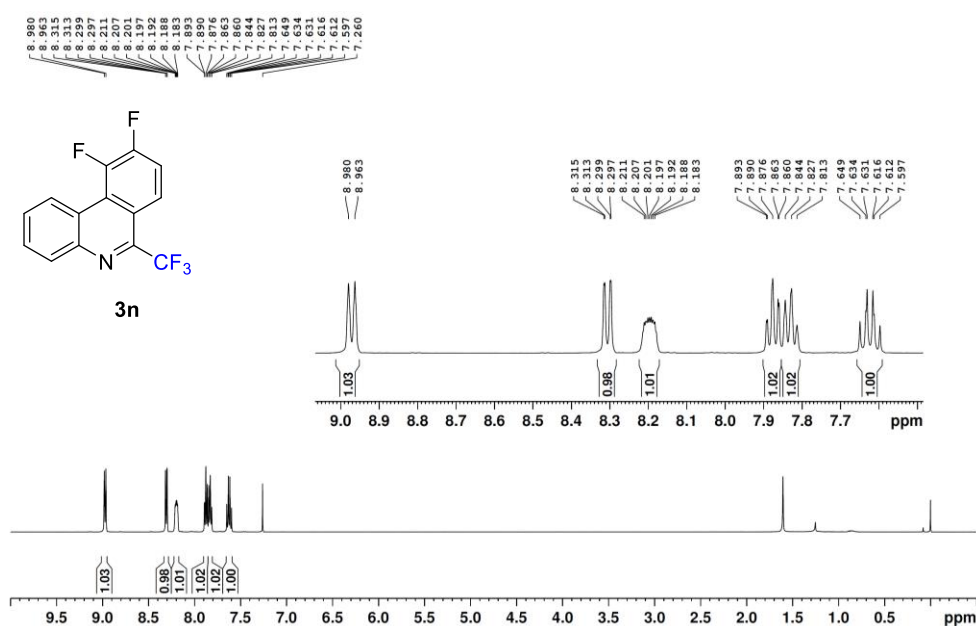<sup>13</sup>C NMR spectrum of **3n** (125 MHz, CDCl<sub>3</sub>)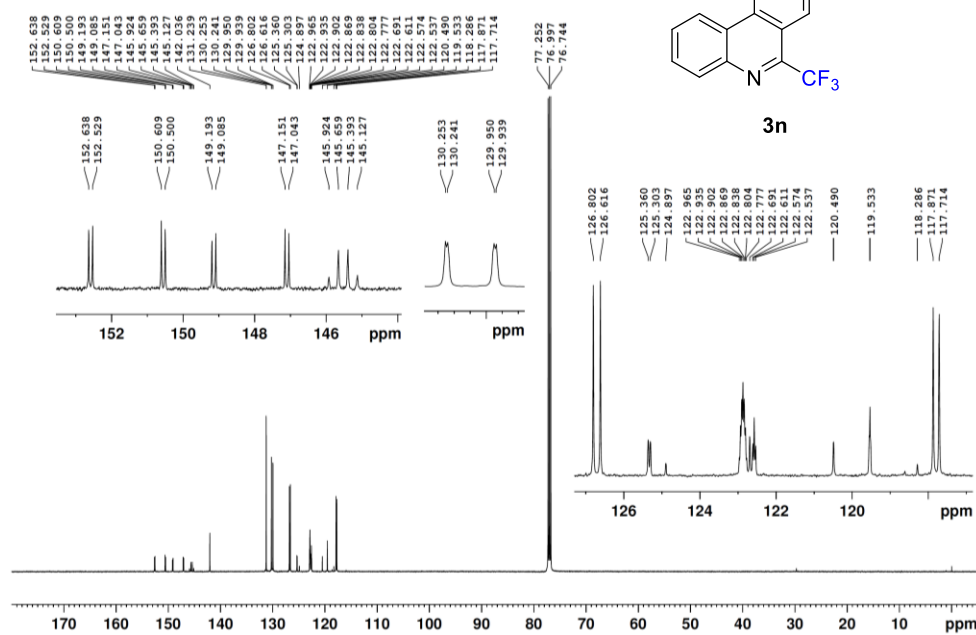



$^{19}\text{F}$  NMR spectrum of **3n** (470 MHz,  $\text{CDCl}_3$ )

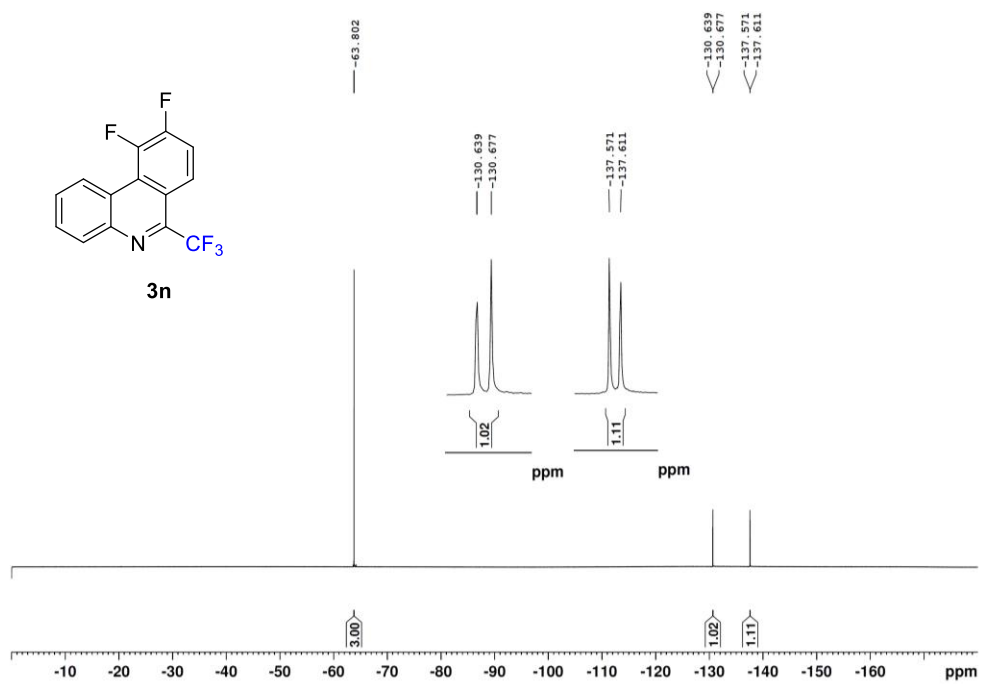

$^1\text{H}$  NMR spectrum of **3o** (500 MHz,  $\text{CDCl}_3$ )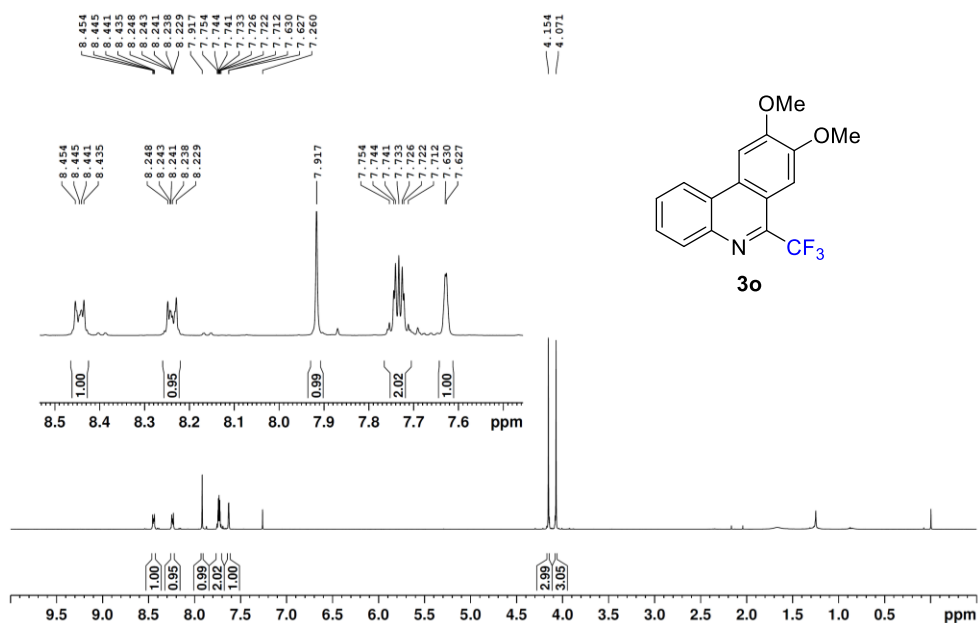 $^{13}\text{C}$  NMR spectrum of **3o** (125 MHz,  $\text{CDCl}_3$ )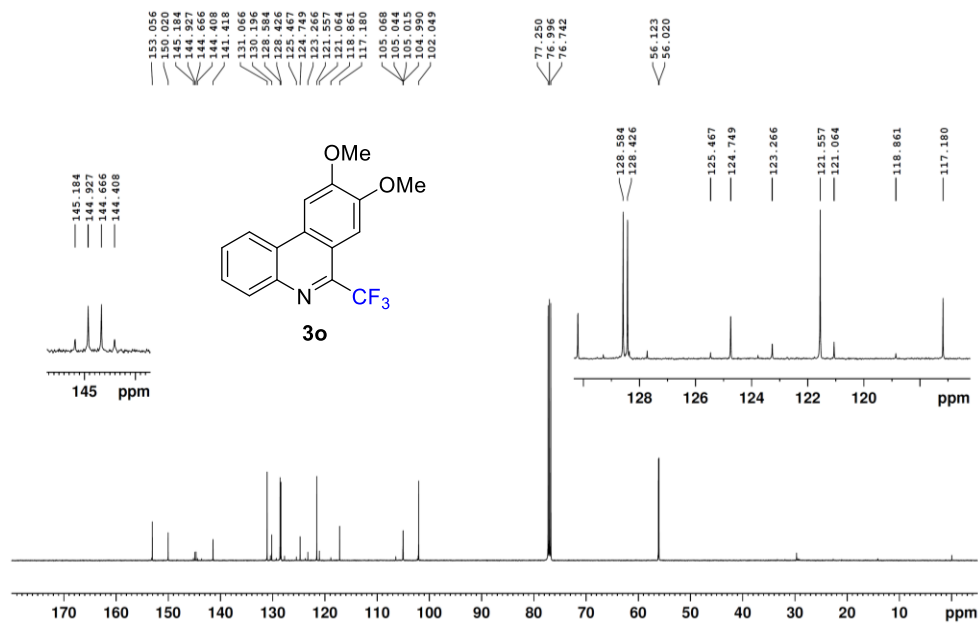

$^{19}\text{F}$  NMR spectrum of **3o** (470 MHz,  $\text{CDCl}_3$ )

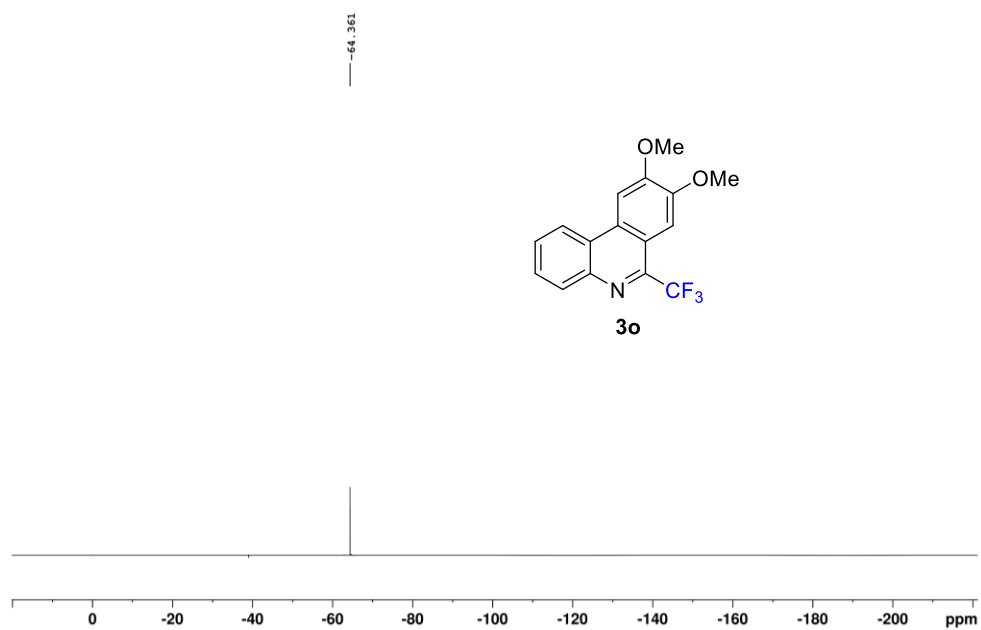

<sup>1</sup>H NMR spectrum of **3p** (400 MHz, CDCl<sub>3</sub>)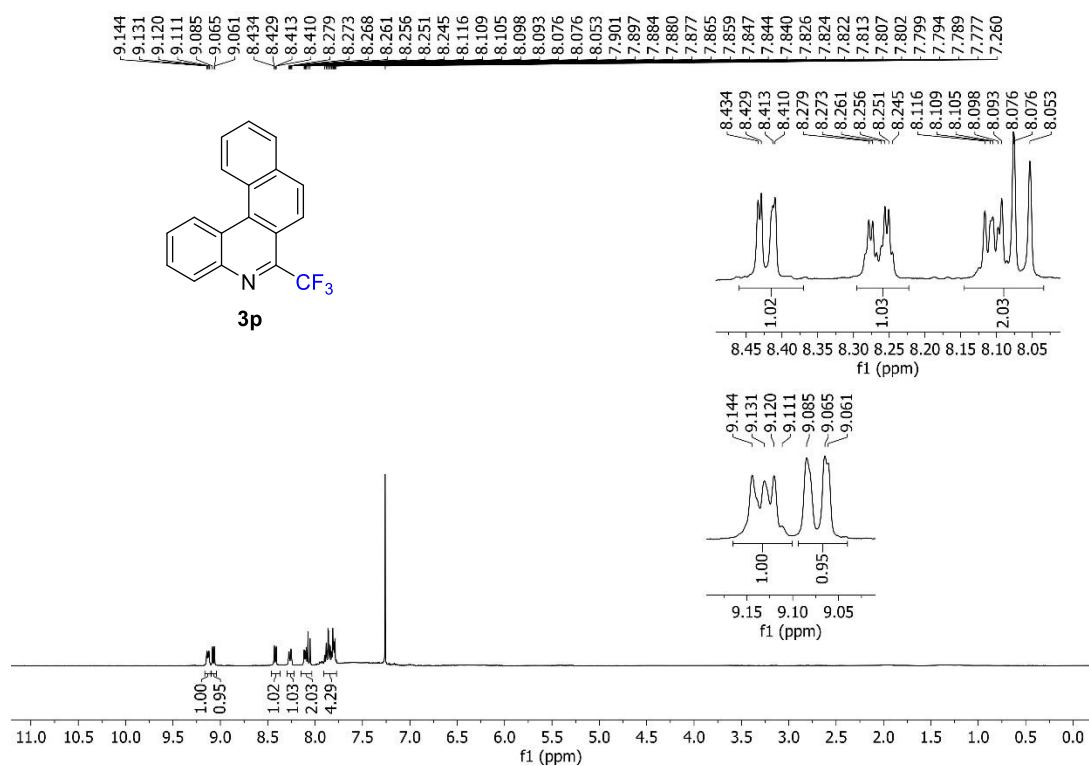<sup>13</sup>C NMR spectrum of **3p** (100 MHz, CDCl<sub>3</sub>)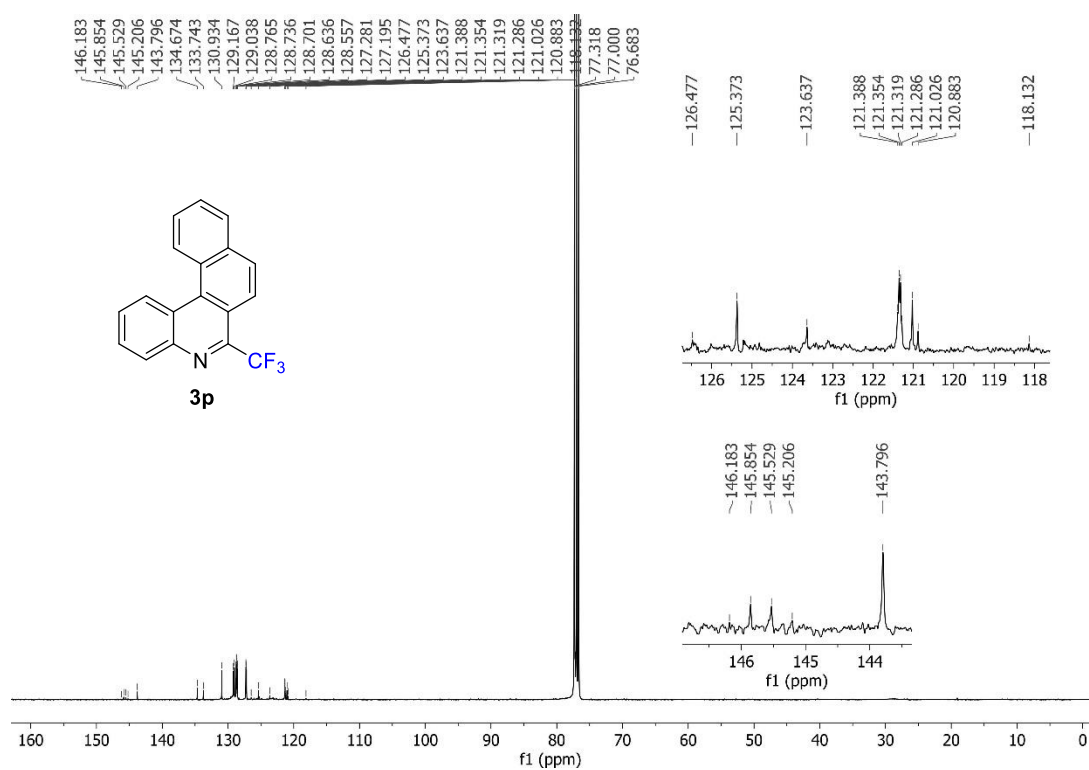

$^{19}\text{F}$  NMR spectrum of **3p** (376 MHz,  $\text{CDCl}_3$ )

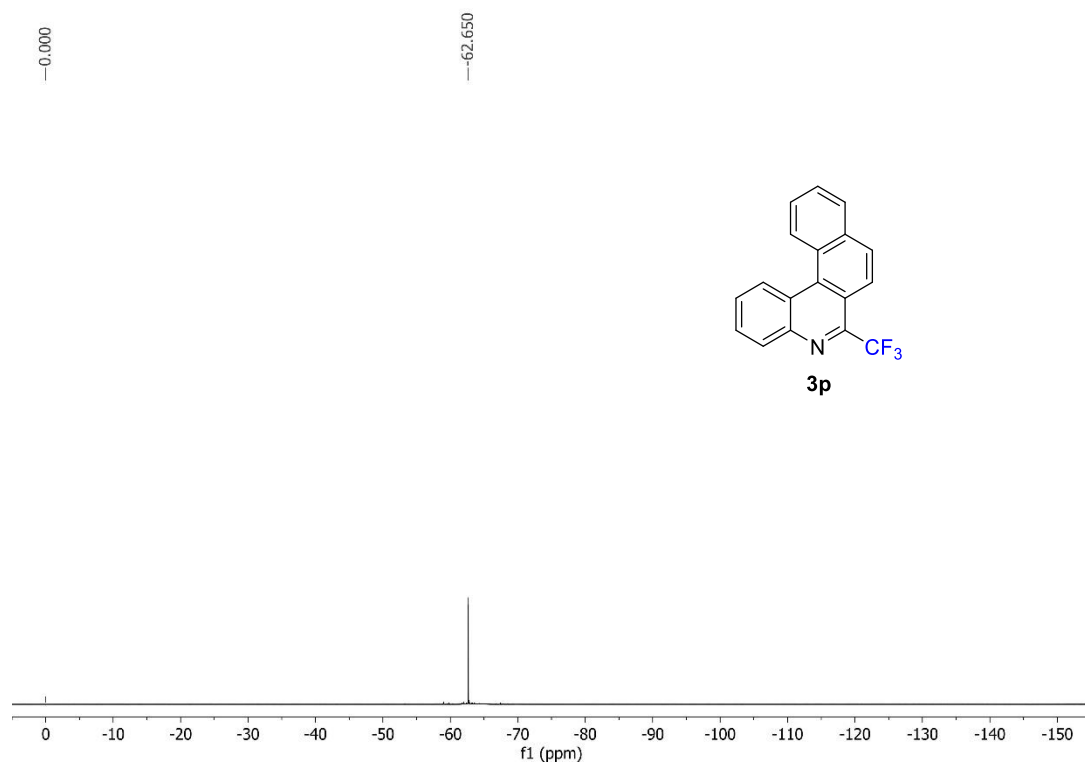

<sup>1</sup>H NMR spectrum of **3q** (400 MHz, CDCl<sub>3</sub>)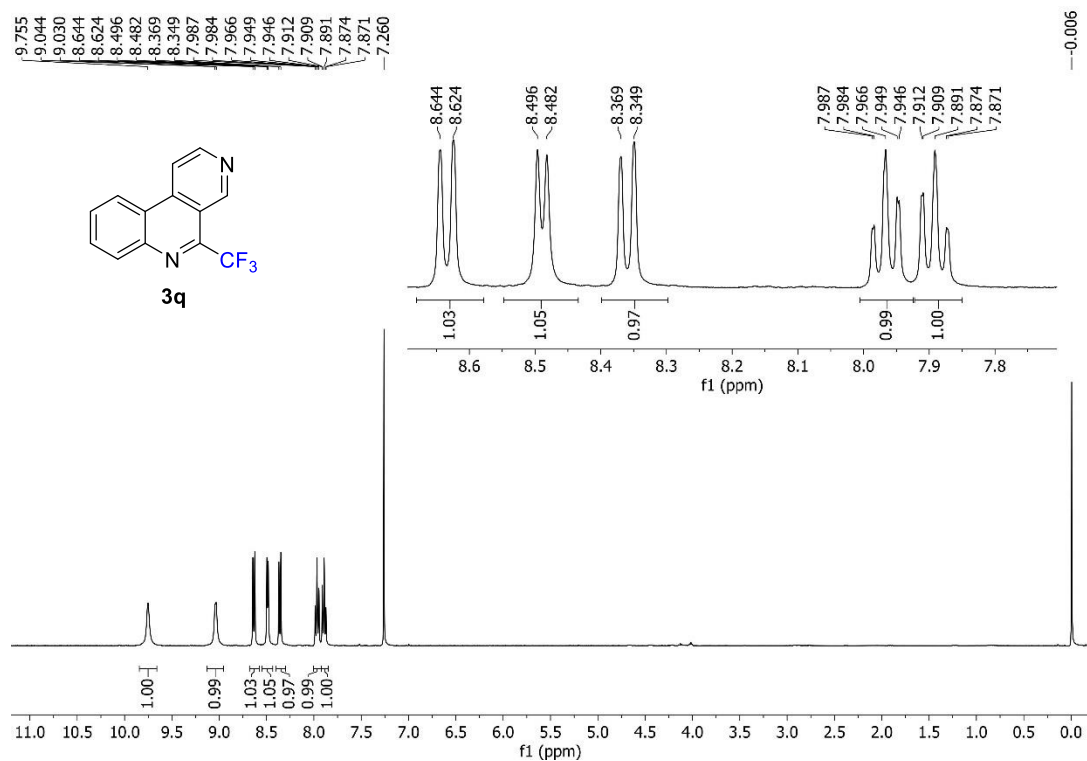<sup>13</sup>C NMR spectrum of **3q** (100 MHz, CDCl<sub>3</sub>)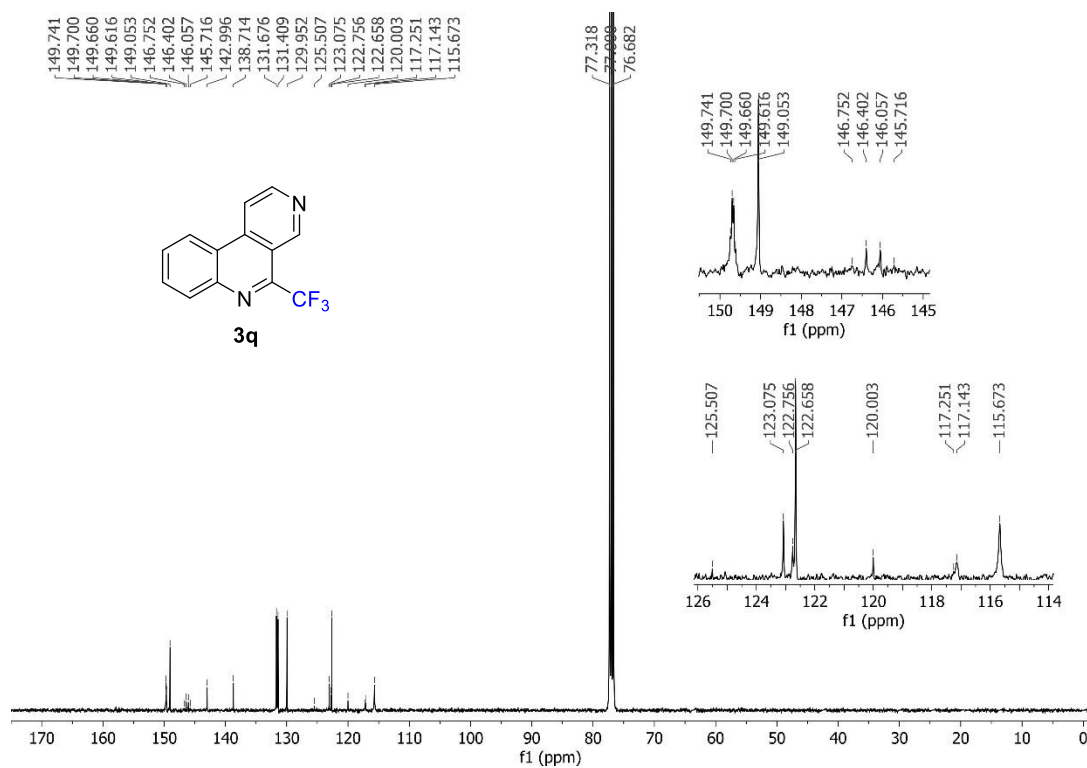

$^{19}\text{F}$  NMR spectrum of **3q** (376 MHz,  $\text{CDCl}_3$ )

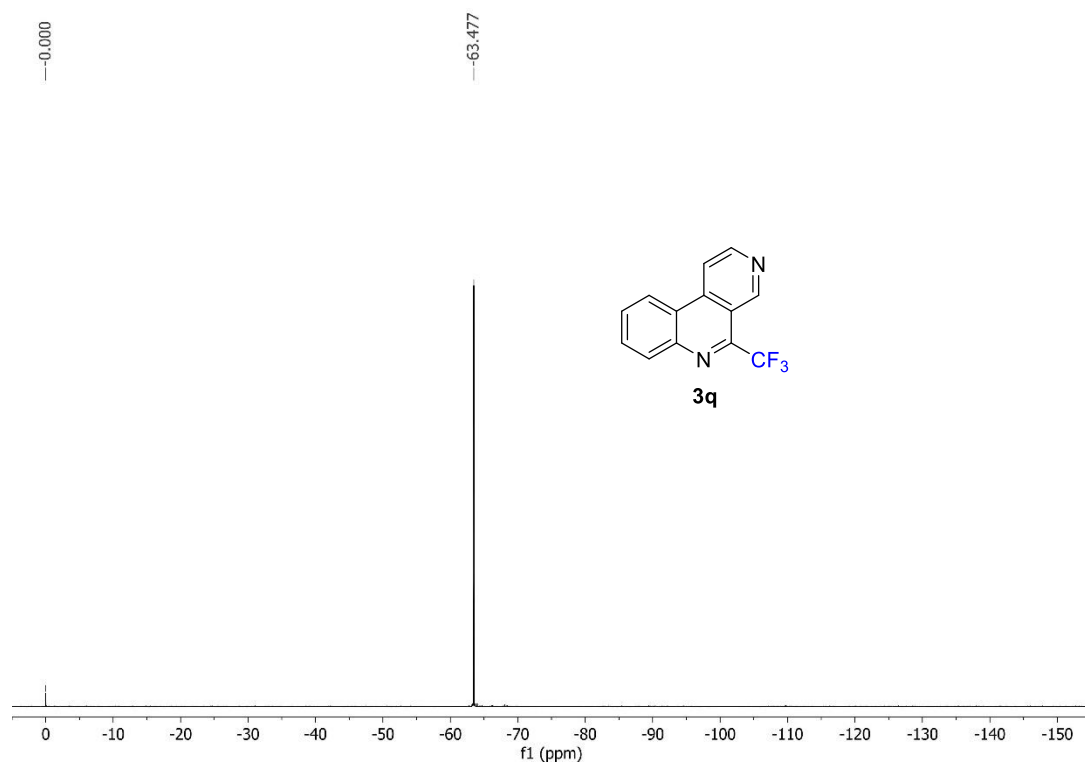

<sup>1</sup>H NMR spectrum of **3r** (400 MHz, CDCl<sub>3</sub>)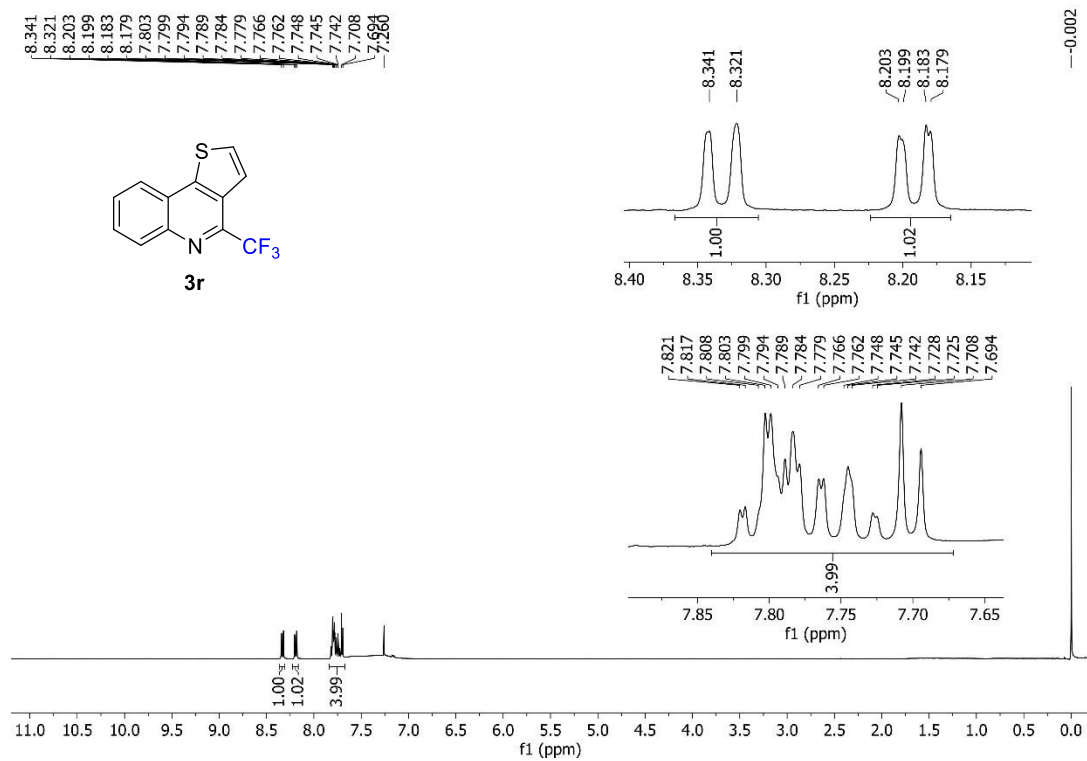<sup>13</sup>C NMR spectrum of **3r** (100 MHz, CDCl<sub>3</sub>)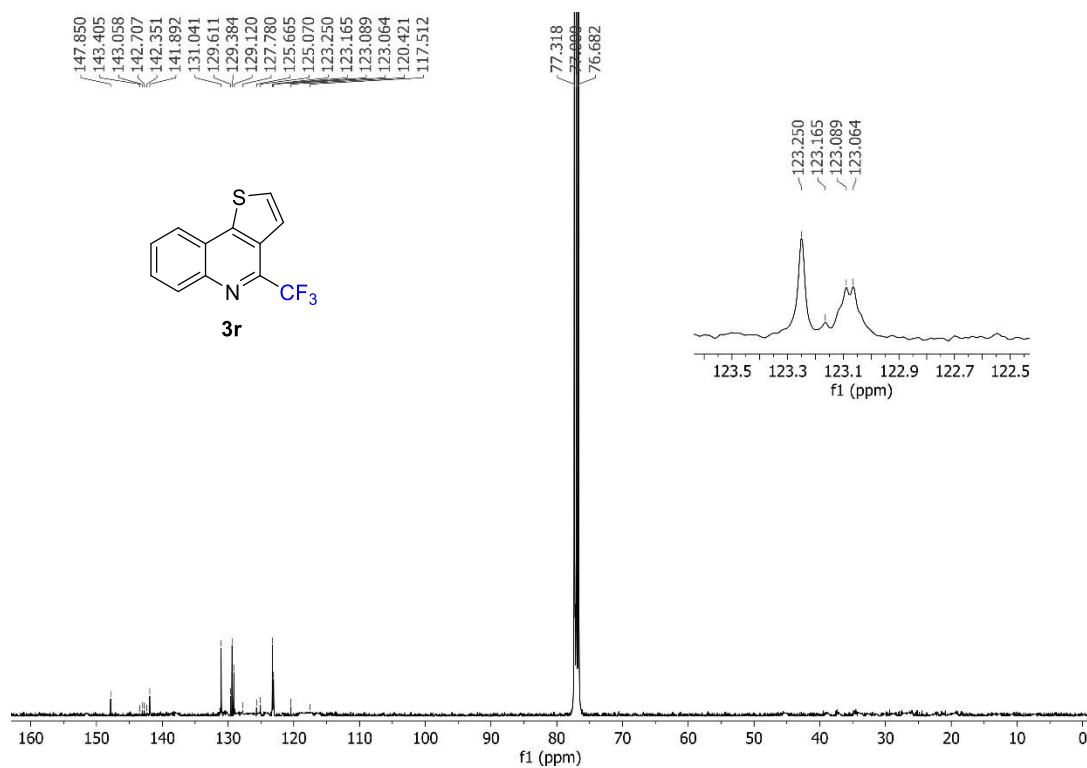



$^{19}\text{F}$  NMR spectrum of **3r** (376 MHz,  $\text{CDCl}_3$ )

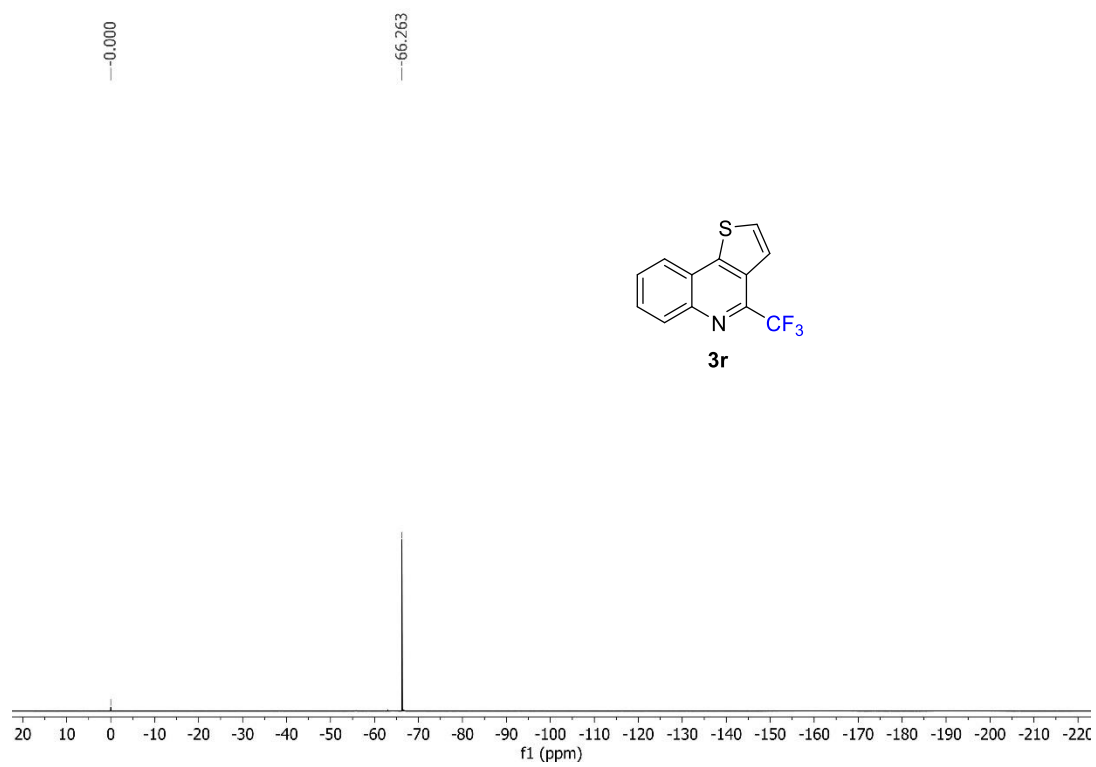

$^1\text{H}$  NMR spectrum of **3s** (400 MHz,  $\text{CDCl}_3$ )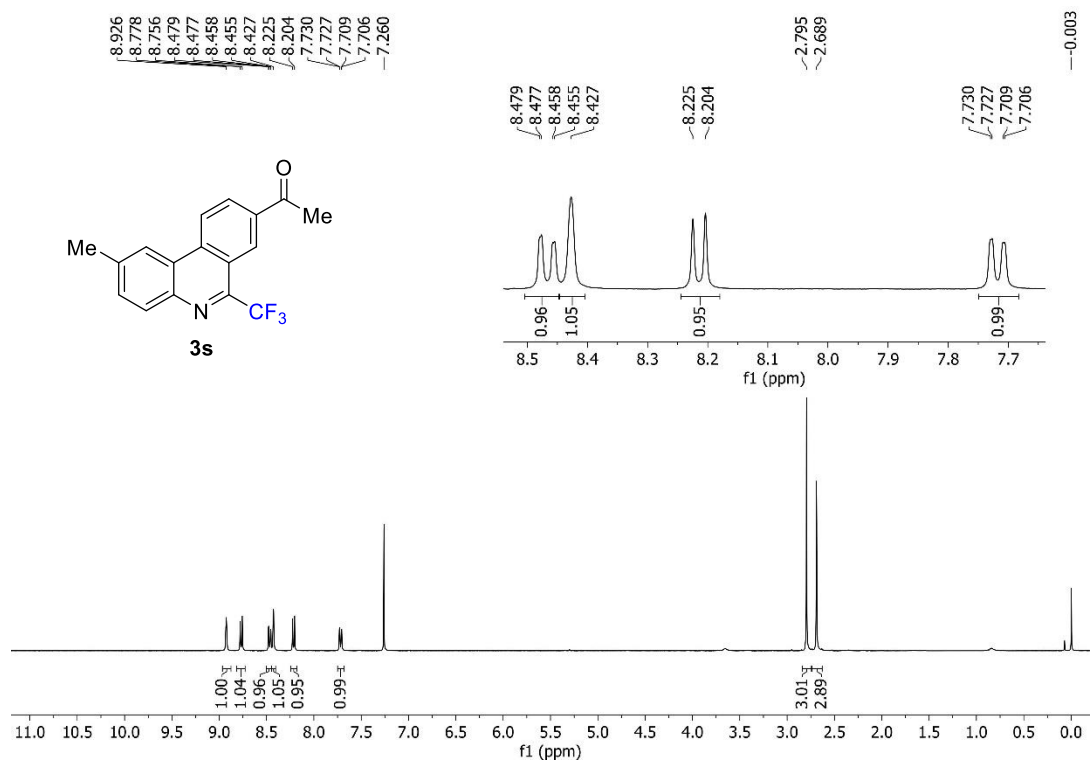 $^{13}\text{C}$  NMR spectrum of **3s** (100 MHz,  $\text{CDCl}_3$ )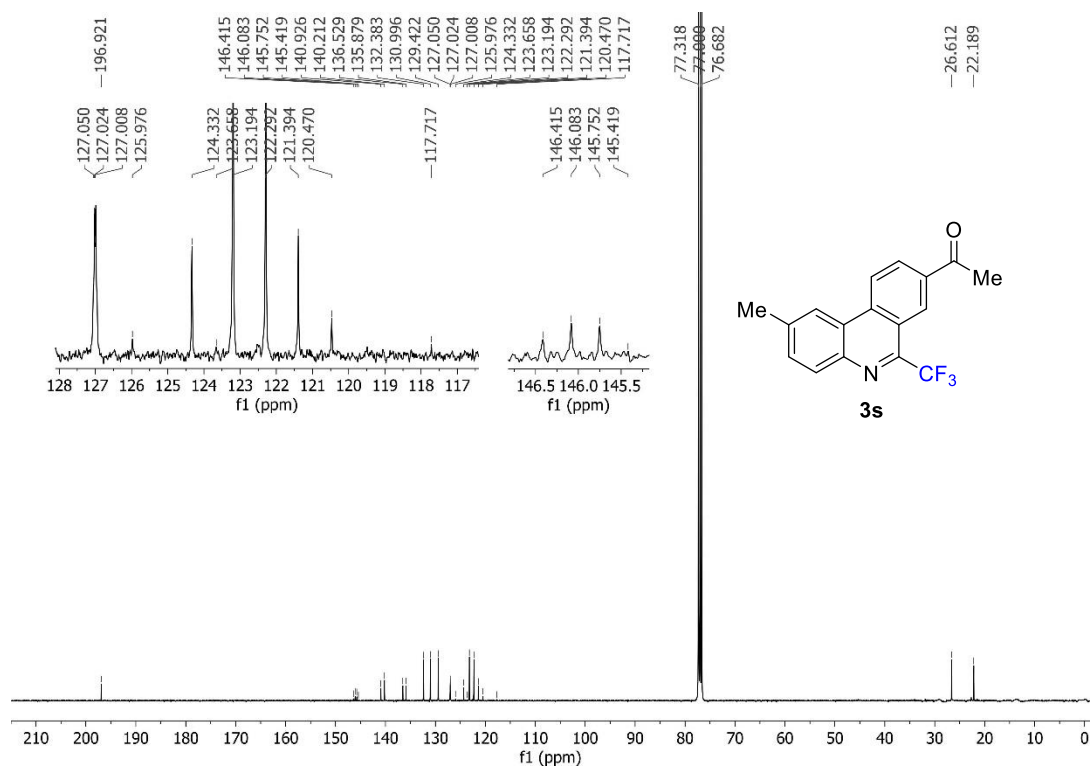

$^{19}\text{F}$  NMR spectrum of **3s** (376 MHz,  $\text{CDCl}_3$ )

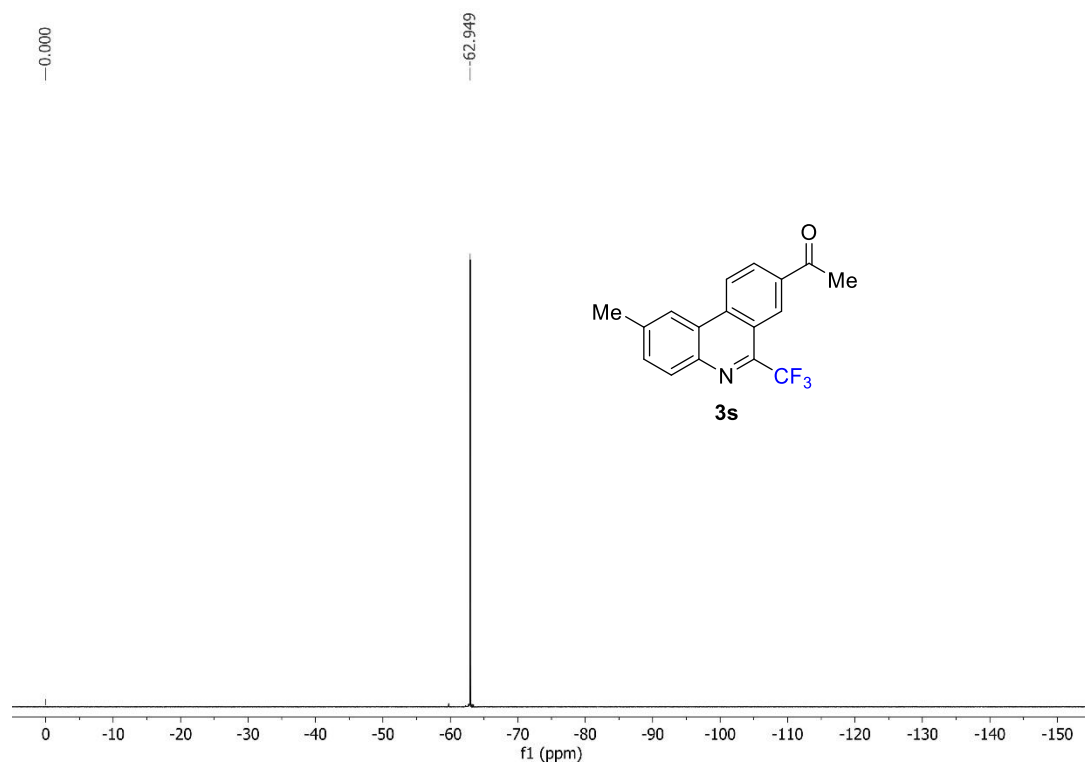

## 9. NMR spectra of (3,3,3-trifluoroprop-1-ene-1,1-diyl)dibenzene 4

<sup>1</sup>H NMR spectrum of 4 (400 MHz, CDCl<sub>3</sub>)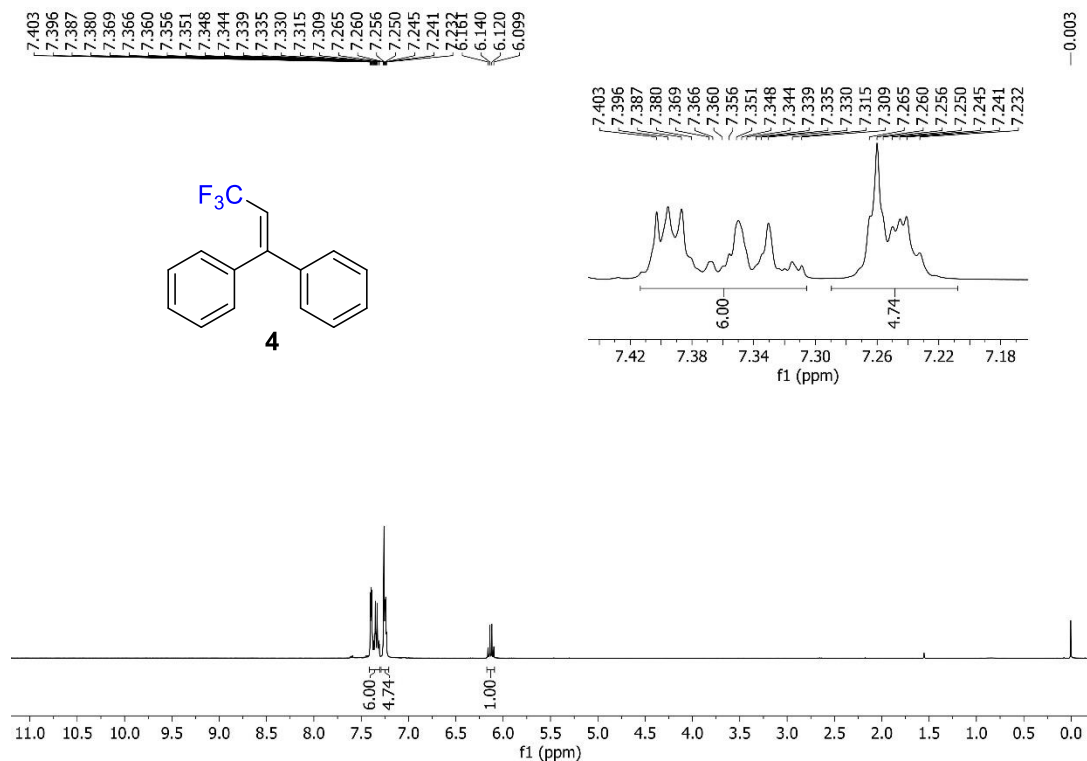<sup>13</sup>C NMR spectrum of 4 (100 MHz, CDCl<sub>3</sub>)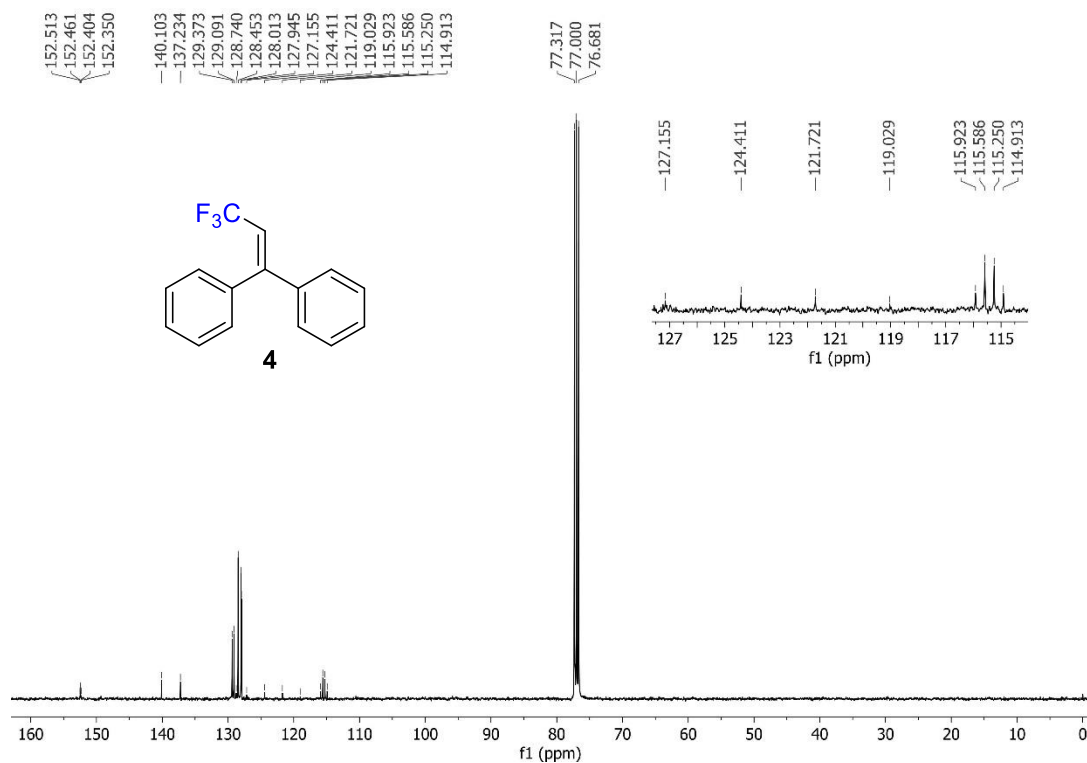

$^{19}\text{F}$  NMR spectrum of **4** (376 MHz,  $\text{CDCl}_3$ )

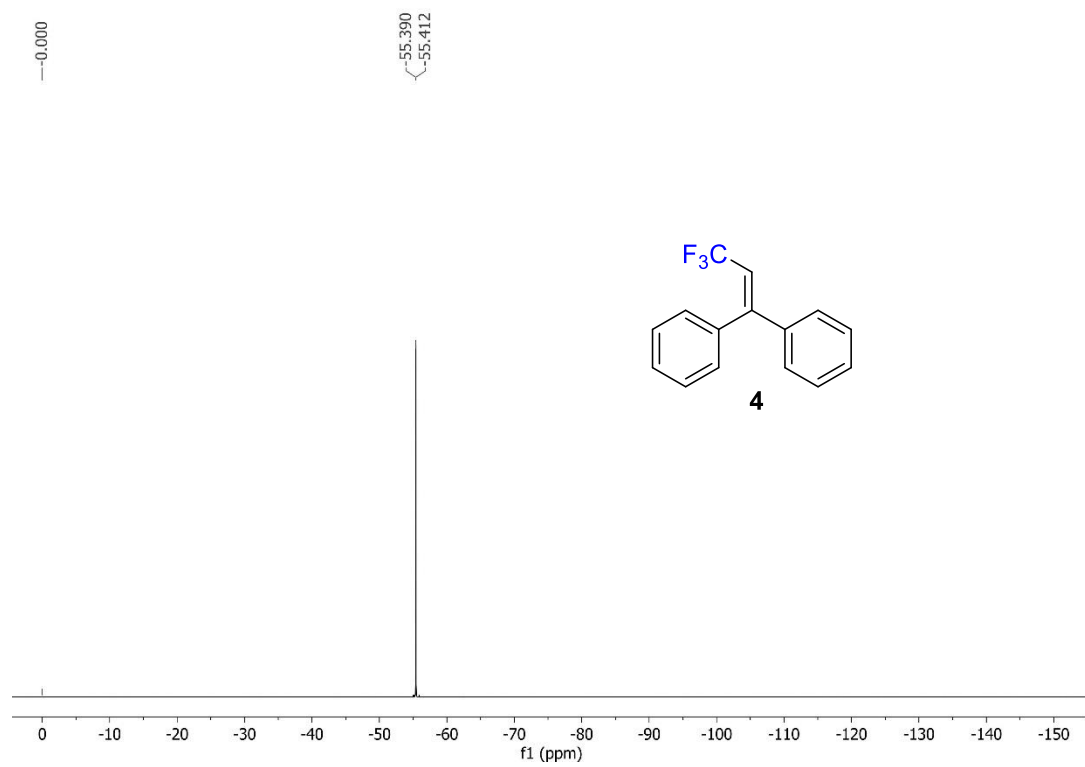

Supplement: d3ob00239j1.pdf [file d3ob00239j1.pdf]
